# Supplementary material for: Target Capture and Massive Sequencing of Genes Transcribed inMytilus galloprovincialis
Source: Hindawi journal article supplement (doi:10.1155/2014/538549), 2014-01-01

Genomic library before (A) and after (B) amplification (BioAnalyzer High Sensitivity DNA chip, Agilent Technologies). Dimension peak was measured at 690 and 680 bp, respectively.

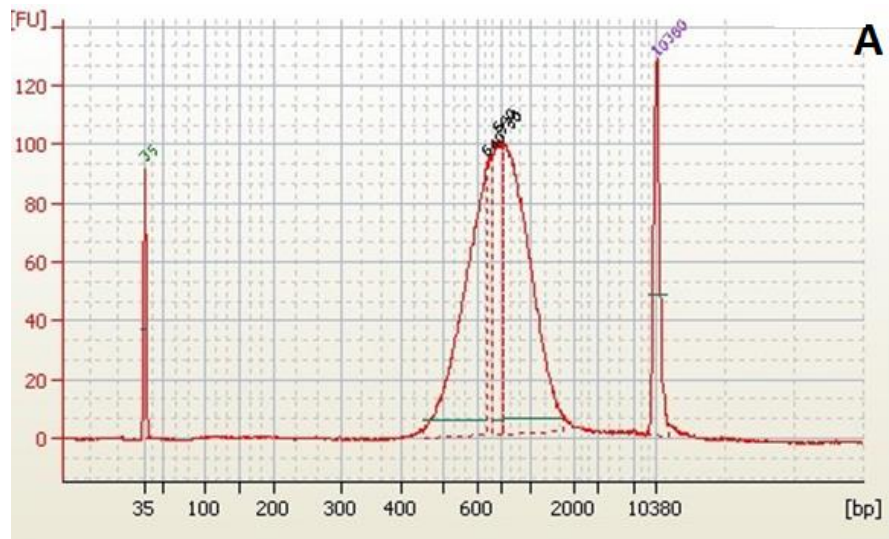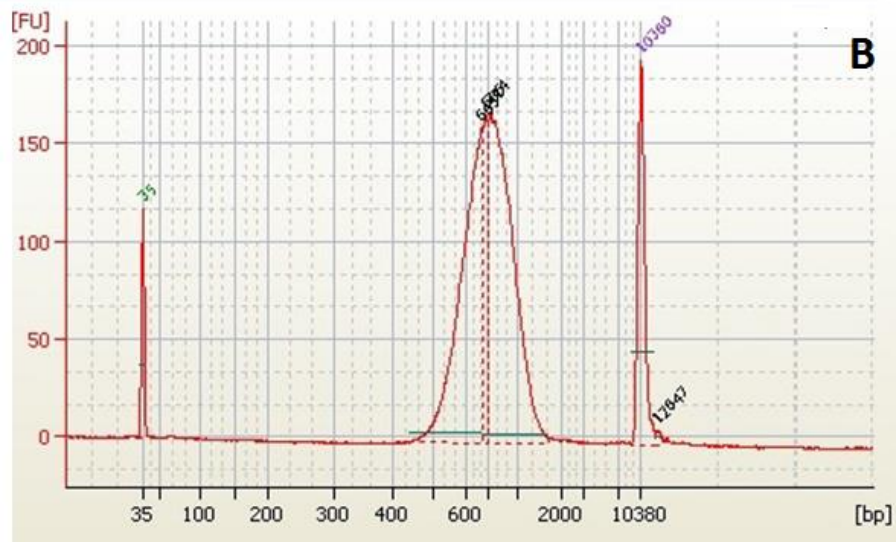

Sequencing output data: C) Read length distribution, D) GC content and E) PHRED quality score of the whole 454–sequencing dataset (RUN\_1 and RUN\_2).

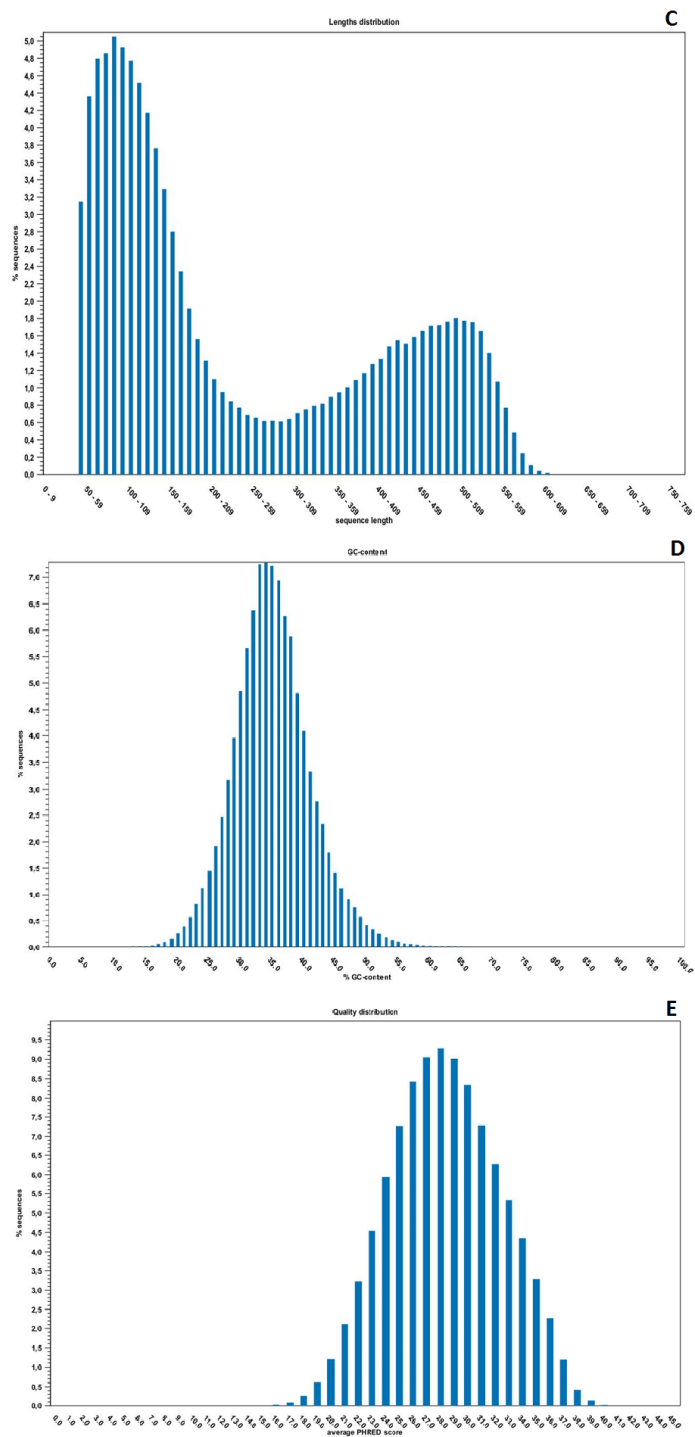

Supplement: f1 [file 538549.f1.zip]
