# Supplementary material for: Target Capture and Massive Sequencing of Genes Transcribed in Mytilus galloprovincialis
Source: Biomed Res Int. 2014 Jun 30;2014:538549. doi: 10.1155/2014/538549 (PMC4101229; doi:10.1155/2014/538549)
Supplement: Supplementary file 1 — SM1. Confirmatory analysis of six selected genomic amplicons. Contig number and ID; primer pairs, amplicon length, description and related fasta sequences. SM2. Genomic library before (A) and after (B) amplification (BioAnalyzer High Sensitivity DNA chip, Agilent Technologies). Dimension peak was measured at 690 and 680bp, respectively. Sequencing output data: C) read length distribution, D) GC content, and E) PHRED quality score of the whole 454-sequencing dataset (RUN_1 and RUN_2). SM3. List of the 1355 target sequences with read coverage. Target length, number of counted reads and average coverage are reported. SM4. Genomic contigs resulting from de-novo assembling of all 454 genomic reads (fasta format). SM5. First-hit BLASTX annotation. Sequence data (ID, length and description) and annotation results (hit description and accession ID, e-value and % similarity) are reported for the most covered contigs (> 100 reads). SM6. Gene structure of contig 2509 (GADD45). A) gene, mRNA and CSD annotation; B) mapping of genomic 454 reads along the contig; C) mapping of trascriptomic Illumina reads along the contig and the coverage graph used to predict the gene structure; D-E) variant positions detected on genome and transcriptome, respectively. [file 538549.f1.zip › 538549.f1/SM1.xlsx]

## Sheet: Foglio1
SM1. Confirmatory analysis of six selected genomic amplicons. Contig number and ID; primer pairs, amplicon length, description and related fasta sequences.
contig number	contig ID	Primer F	Primer R	Amplicon length (bp)	description
1	MytlC_gene	AGTTATCCTAGCCATCGC	ATGGTATGCTCGCTGGAA	972	Mytilin C, new gene
2	MytlC_gene	AGCGAGCATACCATGAAA	CAAGTGAAACGAAAGGGAAAG	500	Mytilin C, new gene
3	contig 251	ATAACCAAGCTACTACCACA	ATAAACACATGACAGACGG	691	intron
4	contig 702	ATACCATGAAATTCTCCCCT	TTGTTCGGTTTCTCCTTTCT	377	intron
5	contig 2509	AAACGGAGGAGGACAATAAA	AGACGGGAAGAATAAAGGA	677	GADD45, new gene
6	MSLAP	CCAGTATACAAACCTGTGAAGA	CTGGTGGATAATTTGTCTTTGC	150	MSLAP, gene
>contig1
TATCTGACTGACACGTAATATCTACAGCGTCTGGCTCTACAACGAGATTTACATCTGGAA
GCACAGCTTGCATCTGCGTCTTGCACTAAAAAAAATATCACGGTTGTAAGAATACAATAA
AAAAAAGTAAAAAGAGGGATATTTCTGATGCGTTATTTGTTTACATATCACGAGGTGTTT
TTTAATGTATATTCTTATATGACATGCTTATTTCTCTTTGTAAATAACACCGTGATAAAG
TTCTCGATATATCTATACCGAGCCTAGACTCAGATGTTCACATAAATCACTGTTACAATA
TACCTCACAAGTAAAAAGCAATTAGGTTTATTTTGTCACAGAATTCAAATAAGTCATTTC
AGGAAAAGTGTTCTATTGCTTGATAGTCAGCGCATTTGTTGAAAATAAGAAATAGCATTT
GCACGCTAGTAGACACAAGACGTGTTTAGATCCTCAGAGTTCATTATGATAGGAATTTCT
AAATCAATTTAAAGTGAGAAAAAATTGAAATAAGAATGTAAGGGTTTATTACAAAATAAT
TAATATGTCTTTATTTGTTTACTGGTAATGTTAATAATTATCAAAGGTACCAGTCTTATA
ATTTGATGCGCTAGACGAGCATTGCCTATGCGGCGAAAAAAACCAGACTTATTTGAATAC
ATTATGCACTCCTATTGGGCGTTCACTTTGTCTTCAAACTTGGGAAATATTTTTTCATAG
TGAAGCTATGCTAAACACACTATTATTCAATAAATAGATAGTATTTATTTGACTAAATAG
CAAAATTTAACAAACAACCATTTATTTCAAAACTTAATCTTCAGTTTTTGCATCCCGATT
TTTTTTAATTAATTTTGGCAATTTGTGTTTCTTCATTTTGGGTAGAATTTTTTTCCCGGG
TGAAGAAGGGTTGTGTGCTATTTACACCTGAGTAATTAACCAATCGGATTGTATGATATT
TGCTGCATCAGAAATAAAATTATGTAC
>contig_2
GGAAAGGTCTATTAACACAGGTCGAATCAGAATATCACTCTGAAACAGAATGTGTATCAA
CGTCACTTTATAAGGCCTTCTCTTTACATTCCAGTTTCACCTTGTTCGGTTTCTCCTTTC
TGCATGTCCTGGAATTGCTCATGGTCATTCATCTGTGCTGGCATCTCAGCTGGTCTGAAG
ATGAAATATGATATATAAGAAATTGGAGGAATACATCTAGATTTAAAAATTATTAAAACG
TGTACGATGTTAAAGTTTACTGTCAGTCTCTTTTAATCTTCTACTCTTGTCAAACATACT
GTTACCCTTTTCGTGATACATGATACAGGCATTATGTAATGCCTTTAATACATTAAGATG
AACTTAATTTTAAAATCATCCCAACTGATGTCTATATAGAAGGCAGTCAAAACTACTTCA
TAAATAAATGCTATAAATGTAACGTACCCTTCACTTTCAGGTGAGAATTTC
>contig_3
CGGTTCTCGTCCCAGAGTAACTGTGATGGACATGTTAGGACGTTTGCGTTTCCATTGAGA
TCACATTCAATGAATTGATGACTATCTGTAGCTACAGAGAAGTAAATTTTGCCGCTGTTG
ACGTTAGCAGTCGTACAAGGATTTTGTACTCCGGTGTTTGTTGTCTGTGAGGTTGTGGTC
TGTAATAGAAAAACAGTACTTGCTCATGCGAAACTATTAGTATTTATACCCATTTACATT
TGTACTCAGAAAACCCACCAATATGTTACTGACGAAGAGTTTTTAACAATTAATTTCGAT
TTAATCAAAATCTGTTTCTGAGATATAGGATGCATGTACTAAAATAAAATATTTTAAGTA
CTCTATTTTAACCAATCAGGTATGACAGTCATATACTTGGTGTGCTTTGTATACTTGAAG
CAAGATATACTTTATATGAAATATAAATTGTACTTAATTTACTAAAATCTATTAAGTAAA
TGTAATAATTTACTTAAATTTATACAAAAAAAACATATATGAAACTATCGTTCAAAGTTA
CACTACACTTAAACATTGAGATGTCTAAAATTGAATGGTAAAGTAAGTTGCGAAAGTGTT
TTTCTAAATGTCCTATGACTCATTGTCTTAAGTTTTAGAGAGGTTCTCATCATATATTAC
CTGTTGTTTGATACATGTG
>contig_4
TTTGTTCGGTTTCTCCTTTCTGCATGTCCTGGAATTGCTCATGGTCATTCATCTGTGCTG
GCATCTCAGCTGGTCTGAAGATGAAATATGATATATAAGAAATTGGAGGAATACATCTAG
ATTTAAAAATTATTAAAACGTGTACGATGTTAAAGTTTACTGTCAGTCTCTTTTAATCTT
CTACTCTTGTCAAACATACTGTTACCCTTTTCGTGATACATGATACAGGCATTATGTAAT
GCCTTTAATACATTAAGATGAACTTAATTTTAAAATCATCCCAACTGATGTCTATATAGA
AGGCAGTCAAAACTACTTCATAAATAAATGCTATAAATGTAACGTACCCTTCACTTTCAG
GGGAGAATTTCATGG
>contig_5
GATCTCATGTTTGGATTAAGCAACATTTTACAGGGTTCTACTTTGCGTCGAAGGCTTCCC
GGTGTTCTGCACGATAATCCAGCAAGTCCTGTTGAGATCTCGTTGCCTCTTTTTGACCTT
TGATTTGTTCCATGATGGTTTTATCAGTTAAGGTTAACTTCCAGGTTTTGGATTCCTGTA
AAAATAAAGAAGGATTATGGTATTAGAATATTTTCCTTTAAGAGTCCACACAAGGAAGAG
TTTTGAGTAAATTCTTATCAATGTTGTAAAATTAGCCTATAGTTTTCTAGGTATTAACCC
ACTTCTTTTCAGGAAATAGTTTTAGTATTGAATTAAAAAAAACTTGTTGATCGATCAATA
AATCGAAAACTTATCATGTACGTATATCAAATATTATTGACGAACTTCGAAAGTTCAATA
TGAAATACTAACAGTAAGTATATTACTTTATCTTTTTGACCTAAACCTAAACCTTACCTG
GTACTAAATCACATGATGATATGATATGCCCTCAATCTGGCAAAGCTACAACTGGTGTCT
GGTTAGCTAACATGGAGTAGTAGTTATTGATGAAATCATTGGCACTCTCATCTGTTTTCT
CGTCTGTTTTTGTGTTTTGTATTAGAACACAACCAACATCTTTATTG
>contig_6
TCTGGTGGATAATTTGTCTTTGCATTATATGTTGTCTTAATAGGTTTGTAAGATGACAGC
TTCTTTGCAAGTGGCAGATAGTTTGTCTTTGATCCATATGTTGGCGGATAACTATTCGTA
GGATGATAACTTGTCTTCACAGGTTTGTATACTGGA
