# Supplementary material for: Target Capture and Massive Sequencing of Genes Transcribed in Mytilus galloprovincialis
Source: Biomed Res Int. 2014 Jun 30;2014:538549. doi: 10.1155/2014/538549 (PMC4101229; doi:10.1155/2014/538549)
Supplement: Supplementary file 1 — SM1. Confirmatory analysis of six selected genomic amplicons. Contig number and ID; primer pairs, amplicon length, description and related fasta sequences. SM2. Genomic library before (A) and after (B) amplification (BioAnalyzer High Sensitivity DNA chip, Agilent Technologies). Dimension peak was measured at 690 and 680bp, respectively. Sequencing output data: C) read length distribution, D) GC content, and E) PHRED quality score of the whole 454-sequencing dataset (RUN_1 and RUN_2). SM3. List of the 1355 target sequences with read coverage. Target length, number of counted reads and average coverage are reported. SM4. Genomic contigs resulting from de-novo assembling of all 454 genomic reads (fasta format). SM5. First-hit BLASTX annotation. Sequence data (ID, length and description) and annotation results (hit description and accession ID, e-value and % similarity) are reported for the most covered contigs (> 100 reads). SM6. Gene structure of contig 2509 (GADD45). A) gene, mRNA and CSD annotation; B) mapping of genomic 454 reads along the contig; C) mapping of trascriptomic Illumina reads along the contig and the coverage graph used to predict the gene structure; D-E) variant positions detected on genome and transcriptome, respectively. [file 538549.f1.zip › 538549.f1/SM3.xlsx]

## Sheet: Data
SM3. List of the 1355 covered target sequences. Number of counted reads, average coverage and reference length are reported.
Name	Target length	Total reads counted	Average coverage
MGC07516	827	41496	9222.75
MGC02388	870	31456	6571.28
MGC01446	962	27964	4595.81
MGC02470	988	16745	3156.87
MGC05133	1000	14405	3203.31
MGC03985	773	11581	2491.4
MGC07846	1188	10663	1819.07
MGC04673	939	9973	1893.91
MGC01886	1117	9532	1357.55
MGC09130	820	9119	2567.96
MGC05048	859	8633	1979.72
MGC03473	1115	8351	1339.83
MGC04733	819	6832	1102.05
MGC04047	1079	6510	1121.81
MGC07841	760	5115	685.82
MGC07960	789	4726	867.18
MGC07638	754	4593	1163.26
MGC03415	801	4480	891.28
MGC00872	1153	4471	671.45
MGC09112	764	4041	912.95
MGC01387	1242	3359	422.51
MGC00246	802	3063	685.28
MGC09115	794	3062	495.78
MGC02301	1214	2734	375.6
MGC07245	758	1663	163.07
MGC02542	788	1621	339.88
MGC07602	757	1533	152.24
MGC03867	771	1530	304.68
MGC04757	789	1394	275.1
MGC04713	768	1264	245.27
MGC01655	768	1198	229.89
MGC08244	770	1169	243.04
MGC05897	1106	1161	124.48
MGC02963	775	1048	280.8
MGC07357	751	899	143.94
MGC00318	1389	748	129.74
MGC04552	809	742	205.34
MGC01332	786	719	104
MGC04284	1100	718	123.46
MGC00175	1579	655	92.23
MGC03603	769	648	110.64
MGC00475	906	580	84.02
MGC08208	772	555	104.64
MGC07820	761	547	76.91
MGC08460	777	539	142.81
MGC01326	764	533	105.85
MGC05074	1035	527	50.51
MGC04687	750	526	80.97
MGC04346	827	490	106.09
MGC01578	918	478	98.47
MGC08501	1136	472	26.09
MGC06692	811	431	33.47
MGC00430	927	410	101.5
MGC00302	1508	384	57.02
MGC00477	1659	330	42.86
MGC03845	777	330	78.92
MGC08226	1054	324	60.75
MGC04136	1033	323	45.41
MGC02996	1216	321	56.26
MGC07616	786	295	46.16
MGC09128	782	294	39.59
MGC04037	762	285	42.91
MGC01790	1325	281	47.25
MGC01962	936	281	55.78
MGC06043	1112	278	40.33
MGC07015	877	277	48.39
MGC00640	772	277	21.47
MGC00243	752	277	68.43
MGC03728	794	276	51.27
MGC03549	803	265	77.96
MGC04333	1095	262	45.16
MGC07456	771	258	60.06
MGC02483	904	257	70.47
MGC01307	846	250	54.35
MGC03879	1427	248	30.86
MGC04257	831	246	31.01
MGC00161	1197	243	31.49
MGC02055	754	243	48.45
MGC00678	2015	240	24.8
MGC04277	904	238	58
MGC01107	1328	234	32.63
MGC03195	1012	233	45.46
MGC04785	866	230	51.75
MGC09450	822	228	31.06
MGC01767	800	226	48.47
MGC00310	940	222	48.58
MGC00269	878	222	46.69
MGC08909	767	213	45.03
MGC01319	1445	212	29.27
MGC00453	977	206	29.07
MGC04188	801	203	27.11
MGC00720	769	203	45.59
MGC02414	1079	197	27.6
MGC03320	790	195	18.46
MGC03169	757	194	35.98
MGC07399	829	191	34.41
MGC05622	834	188	41.56
MGC06219	1415	185	28.23
MGC01633	750	183	33.63
MGC05436	969	179	32.5
MGC03757	838	178	45.7
MGC04310	1739	177	22.93
MGC00145	1663	175	21.63
MGC00015	916	174	14.12
MGC04411	1259	170	30.58
MGC04094	801	170	17.82
MGC07394	753	170	33.29
MGC04355	1398	168	25.05
MGC03852	1038	167	28.15
MGC00030	1107	165	22.19
MGC00586	886	165	42.46
MGC03070	860	165	34.8
MGC00214	847	165	31.68
MGC06446	766	163	26.87
MGC00206	1472	162	23.87
MGC02150	1058	161	37.17
MGC07304	837	161	12.94
MGC02940	799	161	41.02
MGC07286	1028	160	29.17
MGC04338	851	160	37.69
MGC02341	1288	159	22.86
MGC02267	946	159	35.68
MGC04726	788	159	31.35
MGC04695	1281	154	18.99
MGC06141	1186	154	28.89
MGC05714	914	154	30.6
MGC00611	1206	153	26.7
MGC01680	1181	153	29.46
MGC01745	789	153	30.28
MGC03955	771	153	39.44
MGC04740	1310	152	21.31
MGC02765	880	152	36.87
MGC04054	839	152	43.35
MGC03572	1165	151	26.12
MGC01186	1396	150	22.31
MGC01801	992	150	19.88
MGC04385	962	150	32.18
MGC01337	956	149	34.43
MGC06272	800	149	28.72
MGC00233	803	148	38.4
MGC03922	1184	147	28.29
MGC02672	797	147	34.38
MGC04470	753	147	40.46
MGC03862	835	145	29.5
MGC03515	770	145	12.45
MGC00934	887	144	23.84
MGC04124	794	144	14.69
MGC03731	896	143	32.18
MGC04640	818	142	21.93
MGC02201	772	142	32.25
MGC03636	813	137	34.02
MGC03951	772	136	16.28
MGC03224	1487	135	8.49
MGC05467	773	135	25.09
MGC00047	1547	134	16.73
MGC00564	1186	134	28.89
MGC01310	987	134	29.05
MGC00099	803	134	21.49
MGC00568	751	134	40.42
MGC02106	1804	132	14
MGC01501	1533	132	13.61
MGC04021	910	132	24.31
MGC02440	1132	131	17.43
MGC00143	841	131	34.52
MGC05012	1000	130	17.32
MGC00405	1154	128	20.36
MGC05693	1075	128	20.71
MGC03796	835	128	25.41
MGC04478	1264	127	20.94
MGC04375	1528	125	11.56
MGC04662	1384	125	20.06
MGC00336	1005	124	24.49
MGC07714	1597	123	12.68
MGC00594	796	123	21.78
MGC02212	871	122	29.65
MGC04452	801	122	25.66
MGC00688	997	121	25.55
MGC05037	772	121	26.78
MGC00533	757	118	28.33
MGC04104	1482	117	9.15
MGC00948	1054	117	21.21
MGC01716	750	117	30.89
MGC06979	1598	116	9.75
MGC04145	834	116	9.6
MGC08907	791	116	17.17
MGC00293	829	115	27.33
MGC01791	750	115	27.86
MGC04121	834	113	12.25
MGC04460	817	113	28.71
MGC03642	805	113	23.29
MGC04085	761	113	30.6
MGC02805	1387	112	11.96
MGC07371	882	112	17.46
MGC05090	878	111	21.86
MGC03678	769	111	18.38
MGC08087	1445	110	11.74
MGC00653	984	110	15.29
MGC00455	813	110	24.55
MGC04318	1051	109	18.73
MGC03682	1021	109	20.83
MGC04429	1015	109	21.27
MGC03556	964	109	21.14
MGC00187	873	109	14.18
MGC03645	808	109	24.23
MGC02932	1575	108	13.87
MGC06230	1083	108	10.71
MGC02343	1069	108	21.01
MGC02481	859	108	24.22
MGC00020	814	108	21.72
MGC01942	1261	107	15.25
MGC00650	1136	107	10.61
MGC01031	1047	106	15.05
MGC00326	893	106	24.3
MGC08598	751	106	29.96
MGC00663	1354	105	16.04
MGC04225	1180	105	9.72
MGC03707	1094	105	21.38
MGC05682	888	105	25.84
MGC03577	813	105	21.4
MGC03992	988	104	14.18
MGC06493	750	104	28.29
MGC02227	1189	103	13.74
MGC08291	764	103	24.41
MGC06314	1035	102	15.74
MGC00276	1245	101	15.86
MGC07656	1218	101	16.35
MGC00500	1019	101	18.74
MGC04423	978	101	18.63
MGC00072	831	101	20.38
MGC04387	827	101	7.89
MGC01693	814	101	14.81
MGC07257	788	101	20.07
MGC07984	757	101	27.36
MGC07355	751	101	32.3
MGC01879	841	100	24.95
MGC09094	786	100	21.17
MGC04324	772	100	29.24
MGC03633	1009	99	13.19
MGC05575	889	99	20.32
MGC07728	755	99	26.87
MGC01042	1035	98	16.19
MGC00388	827	98	27.05
MGC05582	1183	97	18.13
MGC01495	990	97	18.53
MGC02351	775	97	16.26
MGC00857	1435	96	15.37
MGC01286	1426	96	14.57
MGC03521	1051	96	17.91
MGC04053	863	96	19.68
MGC00157	1101	95	7.66
MGC00361	952	95	19.13
MGC00774	903	95	21.28
MGC08439	777	95	18
MGC08986	755	95	27.55
MGC03972	1206	94	10.82
MGC05006	1090	94	15.42
MGC03736	1019	94	13.11
MGC03975	785	94	23.63
MGC07764	781	94	20.09
MGC04763	1224	93	15.92
MGC03566	1212	93	15.4
MGC02785	1134	93	12.97
MGC00058	917	93	18.7
MGC06315	808	93	24.8
MGC05604	803	93	17.91
MGC07312	801	93	19.49
MGC03671	781	93	25.4
MGC04078	769	93	15.27
MGC03934	1422	92	13.17
MGC00545	1070	92	15.81
MGC02970	887	92	14.11
MGC07277	1206	91	9.91
MGC00365	845	91	20.67
MGC00488	802	91	13.63
MGC04340	1545	90	6.32
MGC07852	1245	90	13.49
MGC00509	1183	90	11.99
MGC04360	1113	90	16.12
MGC03983	1102	90	14.96
MGC07089	1015	90	19.49
MGC00003	785	90	18.06
MGC03799	753	90	25.26
MGC07631	750	90	26.31
MGC07920	1187	89	8.18
MGC04936	943	89	20.96
MGC04252	889	89	15.22
MGC00986	807	89	18.23
MGC07730	806	89	8.39
MGC05736	782	89	19.03
MGC07787	758	89	20.93
MGC04690	756	89	21.95
MGC00831	1489	88	8.71
MGC04082	1363	88	7.25
MGC04607	1078	88	15.47
MGC00314	890	88	16.73
MGC03954	1390	87	10.13
MGC03168	1342	87	13.86
MGC00907	1212	87	11.87
MGC00195	972	87	12.5
MGC00493	941	87	17.25
MGC07116	897	87	19.3
MGC03957	823	87	21.22
MGC05759	755	87	20.16
MGC05435	1193	86	13.9
MGC00417	1172	86	13.54
MGC06736	1147	86	9.16
MGC01843	996	86	18.14
MGC00750	814	86	16.33
MGC01590	775	86	22.79
MGC04194	1088	85	8.65
MGC04271	796	85	17.71
MGC00258	792	85	19.2
MGC00147	763	85	17.5
MGC03809	763	85	14.9
MGC03196	880	84	20.33
MGC04262	842	84	18.44
MGC03619	834	84	12.63
MGC08771	768	84	21.09
MGC04930	761	84	23.48
MGC04543	759	84	19.29
MGC07175	1151	83	15.31
MGC04667	967	83	14.44
MGC04131	919	83	17.26
MGC02457	817	83	19.17
MGC07696	788	83	21.65
MGC03591	760	83	14.16
MGC01287	751	83	23.67
MGC04639	862	82	16.83
MGC03623	828	82	19.94
MGC03561	811	82	22.55
MGC08805	769	82	18.64
MGC07264	767	82	16.06
MGC08378	766	82	26.93
MGC01604	1394	81	5.21
MGC02759	1164	81	14.07
MGC03984	1094	81	13.23
MGC04381	917	81	10.74
MGC02839	870	81	14.95
MGC00304	839	81	10.86
MGC00351	814	81	20.66
MGC04737	778	81	20.26
MGC00752	767	81	11.85
MGC09439	767	81	15.79
MGC07755	760	81	18.33
MGC03557	887	80	16.56
MGC04072	856	80	10.96
MGC03600	826	80	13.18
MGC03644	799	80	23.11
MGC05999	1220	79	10.63
MGC04992	1073	79	8.76
MGC04668	1047	79	14.36
MGC04548	818	79	24.62
MGC07413	772	79	18.91
MGC00300	690	79	20.93
MGC04227	1230	78	8.99
MGC01247	955	78	16.33
MGC05087	1258	77	12.88
MGC01735	1106	77	9.88
MGC04705	1039	77	13.96
MGC02816	977	77	10.79
MGC04455	945	77	13.72
MGC06017	869	77	20.29
MGC04139	806	77	14.03
MGC07308	789	77	6.11
MGC09056	767	77	15.35
MGC03848	1091	76	9.92
MGC02558	1010	76	14.31
MGC04681	990	76	9.04
MGC03539	851	76	14.53
MGC00402	781	76	16.14
MGC05137	780	76	16.57
MGC03210	1273	75	7.87
MGC08739	932	75	11.18
MGC07729	794	75	20.23
MGC01699	787	75	14.56
MGC00221	759	75	21.72
MGC02678	1204	74	8.94
MGC01593	972	74	11.01
MGC05508	935	74	11.82
MGC04306	892	74	15.14
MGC04176	836	74	19.33
MGC03693	816	74	12.99
MGC07609	772	74	14.86
MGC01586	1092	73	7.26
MGC01829	1041	73	12.79
MGC06701	841	73	20.22
MGC02628	821	73	17.14
MGC04207	784	73	20.01
MGC05017	762	73	15.01
MGC00069	1331	72	8.36
MGC05322	1087	72	10.3
MGC06334	913	72	9.22
MGC00287	823	72	16.81
MGC04728	784	72	21.58
MGC04012	781	72	18.53
MGC01624	1537	71	5.99
MGC00484	1305	71	10.3
MGC02119	1073	71	9.84
MGC00165	1020	71	8.73
MGC00371	962	71	11.2
MGC03634	765	71	12.44
MGC07705	764	71	17.18
MGC00138	917	70	10.58
MGC01894	863	70	19.97
MGC04426	822	70	14.63
MGC04445	794	70	16.95
MGC07856	777	70	16.17
MGC03657	758	70	17.38
MGC07620	754	70	20.67
MGC04783	1259	69	10.48
MGC02094	1004	69	8.79
MGC03898	985	69	12.79
MGC03838	822	69	10.06
MGC01922	792	69	17.56
MGC07570	768	69	18.15
MGC04297	761	69	18.5
MGC02777	754	69	17.75
MGC07686	829	68	18.12
MGC00400	827	68	13.62
MGC04187	826	68	16.23
MGC05509	793	68	16.21
MGC00225	785	68	14.63
MGC00715	785	68	13.7
MGC00322	782	68	16.72
MGC05699	1387	67	5.96
MGC04688	1259	67	6.65
MGC00019	1036	67	9.98
MGC02128	961	67	9.6
MGC04942	923	67	11.22
MGC00344	872	67	13.92
MGC03994	802	67	10.74
MGC06568	795	67	15.69
MGC06722	754	67	10.26
MGC00680	1156	66	12.95
MGC01282	997	66	10
MGC00757	939	66	14.39
MGC04249	868	66	9.87
MGC04520	848	66	15.53
MGC00384	811	66	15.8
MGC03523	810	66	18.63
MGC03758	805	66	10.19
MGC00438	780	66	20.1
MGC07943	773	66	11.3
MGC04541	771	66	10.13
MGC00597	769	66	14.56
MGC04193	764	66	16.21
MGC00464	1975	65	5.15
MGC05157	980	65	11.15
MGC03563	887	65	13.62
MGC04451	814	65	10.2
MGC04420	799	65	17.69
MGC05476	786	65	12.37
MGC08225	786	65	8.92
MGC04457	777	65	15.66
MGC05835	1249	64	8.42
MGC03660	1228	64	9.21
MGC00007	899	64	12.05
MGC03551	855	64	12.78
MGC04074	776	64	12.32
MGC08266	773	64	17
MGC04466	761	64	16.18
MGC03554	753	64	19.74
MGC04493	1507	63	5.82
MGC00189	1242	63	5.38
MGC06771	846	63	16.62
MGC04326	819	63	13.64
MGC04174	813	63	13.21
MGC03632	812	63	16.74
MGC00367	799	63	13.47
MGC00313	791	63	15.57
MGC08006	779	63	12.4
MGC00433	774	63	19.5
MGC03808	757	63	14.89
MGC01012	755	63	19.05
MGC00054	1340	62	6.64
MGC05020	1039	62	10.58
MGC00681	879	62	9.26
MGC03942	878	62	14.89
MGC01383	820	62	10.15
MGC03691	789	62	13.76
MGC04050	762	62	15.82
MGC03528	1049	61	15.03
MGC02287	994	61	9.58
MGC07784	915	61	14.91
MGC00425	835	61	16.28
MGC03553	818	61	16.31
MGC04190	788	61	12.72
MGC05191	783	61	11.76
MGC02493	779	61	11.64
MGC07295	778	61	15.24
MGC05338	757	61	15.82
MGC00935	817	60	15.45
MGC02675	789	60	10.09
MGC07697	786	60	16.27
MGC03869	774	60	10.39
MGC09406	774	60	12.03
MGC08283	762	60	16.67
MGC03726	759	60	10.26
MGC08145	759	60	16.39
MGC03857	1160	59	10.23
MGC00616	956	59	11.87
MGC03990	882	59	6.06
MGC03855	806	59	13.39
MGC04116	805	59	10.02
MGC04092	800	59	11.25
MGC04328	790	59	14.82
MGC02408	784	59	12.78
MGC04155	772	59	13.55
MGC08564	762	59	10.65
MGC02335	755	59	9.68
MGC05677	938	58	7.82
MGC02435	857	58	12.37
MGC03446	857	58	10.25
MGC04382	811	58	9.83
MGC07318	799	58	12.94
MGC03599	796	58	13.64
MGC08737	784	58	8.61
MGC01966	770	58	12.26
MGC00060	2033	57	4.11
MGC05984	1206	57	5.6
MGC02445	1030	57	7.13
MGC05146	889	57	11.3
MGC05257	847	57	7.62
MGC03626	828	57	10.7
MGC03587	817	57	13.51
MGC03778	808	57	11.25
MGC00192	796	57	9.18
MGC08210	771	57	10.76
MGC07843	759	57	10.33
MGC07396	754	57	12.85
MGC08725	752	57	17.55
MGC02120	1441	56	8.59
MGC06635	1425	56	5.64
MGC02143	1189	56	9.25
MGC04376	1167	56	9.07
MGC01597	937	56	11.49
MGC07561	881	56	12.72
MGC04839	849	56	9.88
MGC03661	807	56	13.19
MGC04407	800	56	9.32
MGC04566	760	56	13.39
MGC07923	757	56	14.81
MGC01636	1110	55	9.03
MGC03812	896	55	12.12
MGC00811	830	55	10.39
MGC01731	822	55	14.14
MGC02446	778	55	11.54
MGC03616	775	55	13.94
MGC05242	1343	54	5.69
MGC04110	1216	54	7.6
MGC06041	1200	54	6.43
MGC01399	1188	54	8.04
MGC06004	1034	54	10.94
MGC03228	906	54	11.34
MGC04268	857	54	5.95
MGC01444	816	54	12.79
MGC00395	814	54	8.55
MGC00901	806	54	9.34
MGC04181	801	54	8.34
MGC08706	796	54	13.81
MGC05905	793	54	8.9
MGC04439	767	54	6.11
MGC00889	758	54	14.7
MGC02260	1308	53	8.71
MGC04747	1162	53	5.03
MGC00673	920	53	9.16
MGC01558	888	53	5.92
MGC00394	844	53	11.79
MGC04612	820	53	13.16
MGC03569	791	53	11.38
MGC07126	776	53	10.61
MGC01667	768	53	11.76
MGC03640	755	53	9.52
MGC04717	755	53	15.39
MGC00517	754	53	12.97
MGC01302	1258	52	6.16
MGC04160	1258	52	8.03
MGC03684	1071	52	10.15
MGC00848	970	52	6.31
MGC02854	951	52	14.05
MGC02109	918	52	8.45
MGC04874	858	52	4.99
MGC06324	849	52	11.91
MGC00277	818	52	7.06
MGC05142	756	52	10.15
MGC03654	1780	51	3.46
MGC02096	1350	51	4.69
MGC03687	1207	51	6.74
MGC04130	1118	51	6.64
MGC00513	1068	51	6.39
MGC06807	944	51	9.76
MGC04531	860	51	10.77
MGC01954	853	51	13.64
MGC03525	850	51	8.55
MGC04362	825	51	8.4
MGC04142	811	51	5.87
MGC03663	809	51	11.48
MGC06378	796	51	8.34
MGC01901	790	51	8.09
MGC02868	789	51	8.55
MGC00473	785	51	10.73
MGC00522	785	51	14.53
MGC05555	783	51	14.96
MGC00126	773	51	13.01
MGC07814	756	51	14.56
MGC05280	753	51	4.5
MGC04887	1049	50	5.39
MGC03860	902	50	11.78
MGC04534	881	50	12.53
MGC04169	869	50	8.15
MGC01091	868	50	12.25
MGC04173	848	50	4.23
MGC00994	803	50	10.52
MGC08212	792	50	11.66
MGC06095	770	50	7.02
MGC05007	762	50	9.97
MGC03773	755	50	11.4
MGC04671	755	50	9.58
MGC08984	754	50	5.54
MGC04264	1341	49	4.09
MGC00327	1092	49	6.84
MGC04170	1000	49	9.2
MGC07293	905	49	9.55
MGC04260	855	49	5.91
MGC00618	840	49	6.71
MGC04099	835	49	3.63
MGC08776	806	49	7.46
MGC01106	764	49	13.94
MGC03710	760	49	12.59
MGC07805	760	49	10.39
MGC01404	1352	48	5.01
MGC05118	1210	48	5.49
MGC02555	830	48	11.38
MGC00220	802	48	8.57
MGC05515	796	48	4.7
MGC04775	781	48	9.9
MGC08344	773	48	9.99
MGC07408	760	48	11.82
MGC01609	1388	47	5.1
MGC03602	1340	47	5.58
MGC05205	1306	47	5.83
MGC04714	996	47	6.21
MGC00041	927	47	7.61
MGC00186	863	47	6.5
MGC03598	845	47	8.87
MGC00297	785	47	12.24
MGC07465	779	47	11.04
MGC03651	776	47	10.51
MGC01814	767	47	13.9
MGC06874	766	47	5.97
MGC00478	761	47	10.58
MGC07478	756	47	8.76
MGC04577	754	47	8.68
MGC04410	753	47	10.87
MGC03995	752	47	12.75
MGC02456	1192	46	4.87
MGC04112	927	46	3.13
MGC04686	785	46	4.53
MGC08236	761	46	9.51
MGC03973	756	46	12.76
MGC08393	750	46	7.69
MGC01441	1270	45	3.96
MGC04987	1154	45	7.12
MGC03519	904	45	10.73
MGC04677	804	45	11.88
MGC00868	798	45	11.02
MGC03825	796	45	7.04
MGC03530	782	45	8.08
MGC08213	772	45	14.49
MGC04280	770	45	9.91
MGC08243	756	45	10.76
MGC08651	751	45	9.77
MGC02814	1133	44	6
MGC05927	1054	44	6.11
MGC07083	1020	44	7.39
MGC06056	997	44	6.92
MGC04417	846	44	6.64
MGC04153	839	44	7.27
MGC04133	828	44	12.78
MGC00670	810	44	10.6
MGC07274	799	44	8.12
MGC00547	779	44	11.04
MGC00794	773	44	10.48
MGC08261	768	44	10.4
MGC08013	765	44	10
MGC09083	757	44	8.07
MGC04151	750	44	8.79
MGC09152	1175	43	3.55
MGC04974	951	43	8.99
MGC04448	938	43	8.2
MGC02637	873	43	7.42
MGC00377	846	43	7.39
MGC05140	827	43	6.94
MGC03318	821	43	6.6
MGC04536	813	43	7.48
MGC03790	810	43	5.23
MGC01290	796	43	6.1
MGC09430	796	43	4.01
MGC07572	774	43	10.83
MGC07669	774	43	8.54
MGC04622	769	43	8.13
MGC03925	760	43	9.42
MGC00079	757	43	9.75
MGC03724	756	43	11.94
MGC01398	956	42	7.34
MGC04908	913	42	10.12
MGC00481	905	42	8.18
MGC04118	825	42	8.03
MGC01293	792	42	9.83
MGC07458	772	42	5.47
MGC00924	764	42	8.35
MGC04570	757	42	9.71
MGC03787	754	42	8.38
MGC07749	750	42	9.57
MGC00423	556	42	10.34
MGC01854	1151	41	5.36
MGC04105	1148	41	4.25
MGC02692	895	41	9.16
MGC01365	861	41	6.02
MGC02171	817	41	8.34
MGC00208	809	41	11.55
MGC06869	806	41	10.46
MGC04648	800	41	9.02
MGC00048	797	41	7.73
MGC00527	780	41	10.49
MGC00364	776	41	5.98
MGC04370	776	41	8.07
MGC07643	776	41	11.19
MGC03021	764	41	8.24
MGC04003	762	41	7.22
MGC03681	756	41	5.54
MGC01861	1921	40	2.96
MGC05469	1058	40	5.74
MGC04167	940	40	5.46
MGC00183	930	40	7.02
MGC01646	897	40	5.55
MGC03596	824	40	7.32
MGC09411	805	40	7.2
MGC03963	798	40	7.78
MGC04539	792	40	8.04
MGC07872	789	40	11.58
MGC05206	779	40	8.02
MGC00721	776	40	5.43
MGC08608	773	40	8.16
MGC05594	1190	39	5.23
MGC01746	1093	39	7.28
MGC05190	1014	39	4.47
MGC04450	961	39	8.78
MGC00148	948	39	5.14
MGC04854	938	39	5.19
MGC00479	864	39	7.97
MGC04079	826	39	4.74
MGC04545	819	39	8.56
MGC04214	805	39	9.84
MGC07323	778	39	6.36
MGC07450	778	39	10.81
MGC05009	776	39	7.47
MGC04108	765	39	6.23
MGC08556	764	39	9.18
MGC07305	761	39	8.67
MGC03745	743	39	8.54
MGC03478	985	38	6.65
MGC01483	946	38	5.44
MGC02167	929	38	3.57
MGC04332	863	38	4.88
MGC04530	855	38	5.12
MGC01092	844	38	7.12
MGC06330	805	38	9.64
MGC03768	799	38	6.02
MGC03771	784	38	7.33
MGC03631	777	38	11.34
MGC03747	767	38	10.86
MGC08559	756	38	4.16
MGC00401	1236	37	4.98
MGC09198	1235	37	1.51
MGC00865	1189	37	4.79
MGC03851	1140	37	5.25
MGC02937	1086	37	4.89
MGC04586	959	37	7.49
MGC00761	846	37	9.34
MGC01907	842	37	8.27
MGC00608	830	37	7.66
MGC04316	811	37	9.09
MGC00031	807	37	6.08
MGC04248	800	37	5.82
MGC04347	799	37	5.38
MGC03558	798	37	11.43
MGC06353	792	37	6.27
MGC08206	791	37	8.45
MGC07662	787	37	7.5
MGC00685	782	37	5.7
MGC03833	776	37	7.02
MGC04787	773	37	6.75
MGC04395	765	37	7.34
MGC07451	761	37	6.56
MGC04828	1504	36	2.47
MGC04720	985	36	5.57
MGC04993	886	36	6.5
MGC02186	883	36	5.37
MGC04964	883	36	6.95
MGC00452	855	36	4.16
MGC00806	816	36	5.82
MGC01662	813	36	5.72
MGC04056	813	36	4.66
MGC03900	804	36	6.82
MGC02136	802	36	6.02
MGC04428	801	36	5.21
MGC04890	797	36	10.51
MGC04430	792	36	4.66
MGC08029	790	36	5.26
MGC00465	788	36	6.79
MGC04716	783	36	8.14
MGC06105	783	36	6.6
MGC03882	778	36	6.16
MGC09105	772	36	7.47
MGC09151	763	36	7.04
MGC00270	755	36	7.36
MGC08108	754	36	5.2
MGC00317	595	36	11.06
MGC03565	1230	35	3.49
MGC02254	1228	35	4.11
MGC01775	1102	35	6.06
MGC04797	1097	35	2.83
MGC03529	1010	35	7.58
MGC03943	958	35	5.57
MGC03611	835	35	5.74
MGC03667	815	35	7.81
MGC00006	812	35	5.86
MGC04405	809	35	4.82
MGC03692	798	35	4.83
MGC05367	779	35	6.31
MGC06363	769	35	6.77
MGC08055	763	35	5.38
MGC07933	759	35	7.3
MGC04510	756	35	8.77
MGC06530	1377	34	2.51
MGC00050	1366	34	2.5
MGC08846	1215	34	3.23
MGC01607	1111	34	3.97
MGC02808	1111	34	3.79
MGC04516	1093	34	2.99
MGC04820	1024	34	4.15
MGC03854	1014	34	3.65
MGC01324	1007	34	5.58
MGC02774	999	34	4.83
MGC03586	808	34	3.1
MGC04359	808	34	11.26
MGC06867	801	34	6.26
MGC00376	795	34	6.49
MGC04459	794	34	3.98
MGC07127	791	34	6.72
MGC00419	787	34	7.5
MGC07576	779	34	8.33
MGC04308	769	34	5.62
MGC05013	764	34	4.07
MGC06860	1326	33	4.38
MGC04869	1293	33	3
MGC02033	1286	33	2.69
MGC00108	1151	33	2.38
MGC06922	1124	33	3.35
MGC02899	1068	33	4.04
MGC02656	1049	33	4.78
MGC00063	964	33	3.45
MGC00011	902	33	5.37
MGC00228	837	33	7.07
MGC04182	822	33	4.68
MGC00626	795	33	6.52
MGC04568	779	33	3.77
MGC04215	770	33	3.07
MGC08872	767	33	5.56
MGC04511	760	33	6.29
MGC04598	754	33	9.06
MGC02176	1413	32	3.15
MGC00180	1274	32	2.9
MGC04512	1156	32	3.78
MGC06898	1138	32	3.31
MGC07418	1104	32	3.12
MGC03538	1046	32	3.31
MGC04377	971	32	3.45
MGC04627	855	32	3.78
MGC04191	833	32	6.01
MGC08127	814	32	7.74
MGC00033	806	32	5.51
MGC03550	805	32	3.24
MGC03769	788	32	3.84
MGC04504	787	32	6.98
MGC02738	780	32	6.9
MGC04859	779	32	5.08
MGC07612	761	32	5.38
MGC03751	758	32	6.33
MGC04315	1180	31	5.24
MGC03165	1001	31	4.16
MGC05907	961	31	3.7
MGC04707	910	31	4.41
MGC00068	893	31	6.96
MGC00299	891	31	6.44
MGC04128	814	31	5.43
MGC04660	806	31	6.17
MGC04344	781	31	5.97
MGC08839	774	31	4.53
MGC00005	756	31	6.75
MGC07049	756	31	4.13
MGC07400	753	31	5.45
MGC05008	1646	30	1.28
MGC04269	1317	30	3.75
MGC03998	1299	30	2.9
MGC03746	1252	30	2.84
MGC05531	1089	30	3
MGC01579	1076	30	4.9
MGC00162	1033	30	4.04
MGC07211	1029	30	3.45
MGC01402	932	30	4.71
MGC08860	896	30	4.3
MGC00864	858	30	6.67
MGC05848	856	30	6.49
MGC04518	850	30	5.75
MGC04117	820	30	7.9
MGC04366	812	30	6.85
MGC09442	802	30	4.29
MGC04413	793	30	2.92
MGC00305	791	30	7.55
MGC06129	786	30	4.26
MGC04537	778	30	7.7
MGC03735	777	30	4.45
MGC04064	775	30	2.62
MGC04089	768	30	6.57
MGC00415	766	30	6.04
MGC09461	763	30	4.16
MGC06058	762	30	4.88
MGC03853	759	30	4.63
MGC00319	754	30	7.13
MGC07538	753	30	4.95
MGC00791	752	30	5.21
MGC02425	930	29	4.27
MGC06421	900	29	6.16
MGC04163	863	29	4.9
MGC03058	860	29	4.72
MGC00245	812	29	5.81
MGC02975	807	29	3.38
MGC03672	804	29	6.6
MGC08088	786	29	6.73
MGC00546	781	29	5.58
MGC07436	772	29	6.13
MGC00103	758	29	6.97
MGC04727	754	29	4.37
MGC00067	753	29	4.01
MGC03714	1165	28	2.78
MGC04813	1052	28	3.67
MGC07038	1019	28	2.21
MGC06198	972	28	3.95
MGC04266	842	28	4.18
MGC04955	836	28	4.09
MGC04127	831	28	2.74
MGC02662	812	28	3.21
MGC07088	812	28	4.78
MGC03670	811	28	4.97
MGC03191	809	28	5.11
MGC04090	794	28	4.13
MGC03861	792	28	6
MGC01206	769	28	8.04
MGC04646	768	28	6.03
MGC00210	762	28	4.91
MGC07983	759	28	4.56
MGC01613	757	28	5.36
MGC01385	1576	27	2.14
MGC02513	1403	27	1.75
MGC04159	1072	27	2.79
MGC01634	1055	27	2.93
MGC07096	1015	27	4.85
MGC06305	922	27	3.09
MGC01570	897	27	3.16
MGC03801	881	27	3.54
MGC04352	869	27	6.18
MGC01422	845	27	3.53
MGC07824	836	27	4.97
MGC07226	828	27	5.27
MGC00352	802	27	5.03
MGC07331	770	27	5.65
MGC00366	762	27	4.64
MGC08667	759	27	5.69
MGC04343	754	27	3.16
MGC01499	753	27	5.1
MGC02314	1444	26	2.12
MGC00174	1272	26	2.65
MGC03534	1143	26	3.39
MGC05644	1104	26	3.13
MGC08268	1071	26	2.63
MGC05715	1057	26	2.46
MGC08960	985	26	2.34
MGC06678	963	26	2.87
MGC04616	946	26	3.72
MGC08957	899	26	2.73
MGC07869	892	26	5.23
MGC05730	884	26	4.09
MGC08031	879	26	5.01
MGC00025	861	26	4.47
MGC04348	829	26	4.93
MGC04803	828	26	3.44
MGC05841	819	26	5.22
MGC03628	794	26	4.91
MGC01439	788	26	3.78
MGC08871	782	26	3.51
MGC03548	778	26	3.8
MGC04242	775	26	4.15
MGC04538	775	26	5.5
MGC04574	771	26	2.76
MGC00217	769	26	5.11
MGC06522	764	26	5.18
MGC01606	759	26	6.03
MGC09392	752	26	3.88
MGC05523	1369	25	2.71
MGC03844	1226	25	2.45
MGC02611	1058	25	2.43
MGC06346	990	25	2.19
MGC00516	985	25	3.08
MGC05887	940	25	3.98
MGC04911	935	25	2.77
MGC04927	853	25	3.03
MGC00674	833	25	3.55
MGC00272	806	25	4.18
MGC01388	805	25	2.35
MGC04722	804	25	4.61
MGC07950	799	25	3.11
MGC03805	786	25	4.44
MGC03606	784	25	3.67
MGC07345	784	25	5.89
MGC00524	778	25	4.94
MGC08843	777	25	2.58
MGC03783	773	25	4.19
MGC03794	768	25	3.66
MGC07765	766	25	3.02
MGC05147	763	25	1.93
MGC02609	762	25	3.73
MGC08584	757	25	3.9
MGC01506	755	25	4.37
MGC04267	752	25	4.87
MGC04103	751	25	7.04
MGC00227	554	25	6.66
MGC06989	970	24	3.41
MGC00486	952	24	4.93
MGC04697	941	24	2.71
MGC05104	899	24	3.01
MGC02169	880	24	3.85
MGC00470	858	24	4.18
MGC04224	835	24	4.81
MGC01455	830	24	4.01
MGC00863	823	24	3.15
MGC05491	818	24	3.44
MGC04404	799	24	2.92
MGC03607	785	24	3.62
MGC03635	780	24	1.64
MGC04731	779	24	4.94
MGC00194	768	24	3.48
MGC04584	760	24	4.95
MGC01334	759	24	5.3
MGC04656	751	24	4.19
MGC03965	1263	23	2.68
MGC00094	936	23	4.02
MGC00482	931	23	3.1
MGC03387	914	23	2.8
MGC04506	899	23	2.96
MGC01349	897	23	1.46
MGC02623	871	23	4.41
MGC00441	846	23	3.93
MGC01327	832	23	4.28
MGC01389	827	23	2.67
MGC03589	801	23	2.52
MGC00024	797	23	4.36
MGC02203	792	23	2.37
MGC04698	791	23	3
MGC04144	788	23	2.9
MGC04342	787	23	3.28
MGC00235	786	23	4.93
MGC07296	783	23	2.93
MGC03832	781	23	4.27
MGC04562	780	23	4.1
MGC03964	777	23	5.58
MGC00931	774	23	3.98
MGC00207	770	23	3.08
MGC04007	763	23	4.09
MGC04774	760	23	3.42
MGC00043	758	23	3.89
MGC03526	754	23	4.52
MGC05081	1217	22	1.99
MGC07613	1156	22	2.32
MGC01920	1111	22	2.03
MGC00540	979	22	3.54
MGC04278	974	22	2.91
MGC00563	891	22	2.82
MGC04367	874	22	2.17
MGC00424	856	22	3.04
MGC05269	841	22	3.88
MGC04313	823	22	3.12
MGC04614	814	22	3.79
MGC04134	811	22	2.61
MGC04501	794	22	3.94
MGC08621	794	22	4.45
MGC05212	788	22	3.51
MGC05024	776	22	2.51
MGC08256	775	22	2.83
MGC02276	763	22	5.41
MGC03727	761	22	3.63
MGC07566	761	22	3.15
MGC09459	756	22	3.9
MGC07917	1254	21	3.01
MGC00127	1105	21	1.71
MGC00476	1080	21	3.27
MGC06341	1042	21	1.72
MGC03614	873	21	4.68
MGC05223	859	21	3.3
MGC00191	854	21	3.12
MGC00051	847	21	4.03
MGC03971	818	21	2.31
MGC00037	807	21	2
MGC07711	777	21	2.97
MGC04814	774	21	3
MGC03748	767	21	1.8
MGC04540	766	21	4.18
MGC06453	761	21	4.15
MGC06909	760	21	3.08
MGC06195	757	21	5.49
MGC00087	686	21	5.35
MGC00840	686	21	5.64
MGC07915	1226	20	2.17
MGC01828	1114	20	2.14
MGC01674	947	20	2.19
MGC04532	879	20	2.82
MGC03582	864	20	3.19
MGC04044	852	20	3.76
MGC02984	836	20	3.29
MGC06628	796	20	1.9
MGC07574	787	20	1.75
MGC09161	775	20	3.53
MGC07523	769	20	2.75
MGC00288	766	20	4.56
MGC03695	763	20	2
MGC07571	750	20	4.8
MGC03868	1162	19	1.82
MGC06669	1040	19	3.33
MGC01917	1007	19	3.24
MGC01466	943	19	2.1
MGC01111	939	19	2.73
MGC01602	862	19	3.89
MGC04221	854	19	2.64
MGC04172	838	19	2.29
MGC01554	836	19	2
MGC04154	821	19	1.81
MGC04137	811	19	2.84
MGC01906	810	19	2.86
MGC00357	796	19	3.14
MGC02148	792	19	3.91
MGC01192	788	19	4.04
MGC03846	781	19	3.07
MGC00010	771	19	3.19
MGC09150	768	19	3.3
MGC09381	755	19	2.77
MGC09401	755	19	3.06
MGC03686	541	19	4.79
MGC00926	509	19	5.3
MGC01652	1600	18	1.93
MGC04273	1179	18	2.7
MGC02559	1070	18	2.65
MGC00440	873	18	5.14
MGC01520	848	18	2.94
MGC04337	847	18	2.28
MGC03613	807	18	5.34
MGC04350	805	18	2.81
MGC01415	798	18	3.88
MGC06955	775	18	2.5
MGC04114	767	18	3.42
MGC07361	759	18	3.42
MGC03547	753	18	2.71
MGC01021	696	18	3.01
MGC00073	1107	17	1.42
MGC06438	1056	17	2.27
MGC05098	1017	17	1.25
MGC06092	896	17	2.45
MGC04018	870	17	1.3
MGC00153	861	17	2.36
MGC07601	856	17	2.32
MGC04782	841	17	1.92
MGC05880	838	17	2.48
MGC03604	834	17	2.34
MGC04524	807	17	3.75
MGC04674	798	17	2.46
MGC00845	793	17	3.28
MGC03643	788	17	2.7
MGC04365	788	17	3.02
MGC03627	782	17	2.83
MGC05308	775	17	6.78
MGC03777	772	17	3.45
MGC04603	765	17	2.75
MGC03544	753	17	2.94
MGC08688	751	17	2.48
MGC04067	1352	16	1.35
MGC04718	1234	16	1.11
MGC06994	1073	16	1.45
MGC06110	1055	16	1.2
MGC03956	870	16	3.48
MGC03894	833	16	2.14
MGC03531	831	16	4.21
MGC04220	810	16	1.86
MGC05809	807	16	2.85
MGC03822	801	16	3.12
MGC04533	794	16	2.01
MGC03902	789	16	1.99
MGC00240	788	16	1.9
MGC05346	786	16	2.69
MGC07380	784	16	1.57
MGC07762	784	16	2.14
MGC02416	783	16	2.03
MGC07422	781	16	3.19
MGC04480	775	16	3.83
MGC09268	774	16	3.69
MGC03849	764	16	4.95
MGC00190	763	16	2.67
MGC06627	759	16	1.89
MGC03818	758	16	2.01
MGC03725	753	16	1.98
MGC00759	1309	15	1.08
MGC03941	1265	15	1.06
MGC06637	1049	15	2.03
MGC06126	909	15	2.84
MGC05410	840	15	2.48
MGC04528	837	15	1.94
MGC09090	809	15	2.1
MGC03785	800	15	2.86
MGC04467	789	15	1.89
MGC07381	787	15	2.61
MGC06475	784	15	1.12
MGC03821	780	15	1.04
MGC00399	777	15	2.68
MGC04028	761	15	1.71
MGC06508	760	15	4.06
MGC00349	758	15	1.37
MGC03637	758	15	1.48
MGC05413	754	15	1.55
MGC07441	751	15	2.26
MGC00421	662	15	2.92
MGC00358	484	15	2.44
MGC01648	1034	14	1.37
MGC00262	970	14	1.23
MGC05722	875	14	2.11
MGC03827	835	14	1.86
MGC03518	790	14	2.64
MGC03570	789	14	2.01
MGC04419	788	14	1.56
MGC01598	786	14	1.25
MGC07700	776	14	1.89
MGC04700	771	14	2.31
MGC09124	761	14	2.08
MGC03648	760	14	5.16
MGC09403	757	14	2.95
MGC01089	755	14	3.45
MGC01336	753	14	2.12
MGC07907	750	14	2.47
MGC03226	977	13	1.08
MGC06026	975	13	1.13
MGC03791	834	13	1.81
MGC04896	829	13	1.08
MGC00385	820	13	1.56
MGC04393	816	13	2.25
MGC05359	810	13	1.16
MGC04312	799	13	1.16
MGC03811	793	13	1.26
MGC00274	777	13	1.57
MGC05176	777	13	1.86
MGC03752	774	13	2.17
MGC08987	761	13	2.92
MGC03605	760	13	2.64
MGC04065	756	13	1.31
MGC04811	754	13	2.94
MGC04435	752	13	1.92
MGC00294	538	13	2.84
MGC00222	1090	12	1.17
MGC00571	981	12	1.35
MGC04636	886	12	1.07
MGC03618	807	12	1.37
MGC05623	804	12	1.23
MGC01166	801	12	1.64
MGC00016	792	12	1.77
MGC00468	786	12	2.15
MGC04755	775	12	2.19
MGC07300	769	12	1.17
MGC02247	768	12	1.49
MGC05986	766	12	1.65
MGC06183	760	12	1.88
MGC04274	752	12	1.53
MGC00659	483	12	1.61
MGC03756	932	11	1.05
MGC04143	921	11	1.32
MGC05552	851	11	1.11
MGC04195	846	11	1.21
MGC04171	840	11	1.13
MGC07417	830	11	2.27
MGC03713	821	11	2.18
MGC03584	802	11	1.49
MGC00724	790	11	2.16
MGC07454	786	11	1.08
MGC04653	774	11	2.35
MGC03689	773	11	2.73
MGC04592	750	11	1.3
MGC04075	1041	10	1.32
MGC02225	1026	10	1.35
MGC01476	1011	10	2.24
MGC07508	965	10	1.41
MGC03932	826	10	1.05
MGC07977	802	10	1.42
MGC08228	799	10	1.15
MGC04412	785	10	1.62
MGC04226	783	10	1.25
MGC03583	772	10	1.04
MGC03650	769	10	2.38
MGC08781	758	10	3.07
MGC07411	755	10	1.7
MGC03620	752	10	2.26
MGC04634	751	10	2.24
MGC08172	751	10	2.17
MGC01140	487	10	2.7
MGC04391	1026	9	1.33
MGC04218	860	9	1.14
MGC04175	838	9	1.01
MGC04832	834	9	1.41
MGC00398	815	9	1.05
MGC00224	790	9	2.36
MGC03755	783	9	2.09
MGC07773	780	9	1.1
MGC03831	778	9	1.3
MGC03719	768	9	1.08
MGC02590	766	9	1.06
MGC04441	759	9	1.21
MGC08196	755	9	1.23
MGC08847	750	9	2.18
MGC05878	553	9	2.61
MGC00146	874	8	1.1
MGC09407	821	8	1.46
MGC02770	809	8	1.06
MGC09409	800	8	1.54
MGC01305	777	8	1.13
MGC09005	768	8	1.01
MGC04645	754	8	1.01
MGC03662	753	8	1.42
MGC06711	580	8	1.16
MGC02087	969	7	1.27
MGC00301	794	7	1.59
MGC04442	790	7	1.1
MGC04216	782	7	1.04
MGC04292	780	7	1.12
MGC03721	752	7	1.44
MGC00431	475	7	1.07
MGC00292	813	6	1.02
MGC00280	481	6	1.05
MGC04486	802	5	1.04
MGC05549	577	5	1.37
MGC04601	768	3	1.01
