# Supplementary material for: Target Capture and Massive Sequencing of Genes Transcribed in Mytilus galloprovincialis
Source: Biomed Res Int. 2014 Jun 30;2014:538549. doi: 10.1155/2014/538549 (PMC4101229; doi:10.1155/2014/538549)
Supplement: Supplementary file 1 — SM1. Confirmatory analysis of six selected genomic amplicons. Contig number and ID; primer pairs, amplicon length, description and related fasta sequences. SM2. Genomic library before (A) and after (B) amplification (BioAnalyzer High Sensitivity DNA chip, Agilent Technologies). Dimension peak was measured at 690 and 680bp, respectively. Sequencing output data: C) read length distribution, D) GC content, and E) PHRED quality score of the whole 454-sequencing dataset (RUN_1 and RUN_2). SM3. List of the 1355 target sequences with read coverage. Target length, number of counted reads and average coverage are reported. SM4. Genomic contigs resulting from de-novo assembling of all 454 genomic reads (fasta format). SM5. First-hit BLASTX annotation. Sequence data (ID, length and description) and annotation results (hit description and accession ID, e-value and % similarity) are reported for the most covered contigs (> 100 reads). SM6. Gene structure of contig 2509 (GADD45). A) gene, mRNA and CSD annotation; B) mapping of genomic 454 reads along the contig; C) mapping of trascriptomic Illumina reads along the contig and the coverage graph used to predict the gene structure; D-E) variant positions detected on genome and transcriptome, respectively. [file 538549.f1.zip › 538549.f1/SM4.xlsx]

## Sheet: Foglio1
SM4. Genomic contigs resulting from de-novo assembling of all 454 genomic reads (fasta format).
>contig_1 Average coverage: 7,03
TATATAAATTTTTAGTTCATCTTATGCTATGCAGTATCACTGTTTGCTGAAACCTATAGG
TTTTTTTGCGCCTGTTCCAAGTCAGGAGCCTCTGACCTTTGCTAGTCTTGTATGATTTTG
AATTTTAGTTCATTTATATATTTCGGAGTTATGGATGTACTTAGGTGAGGTTTTGGAATA
AGTATCAAATATTCGGACTCCTCGGTGTTTTTCCATACGATACAAGATAAATTATTTGTC
CCATAACACCTATTTATCTTTTAACATAA
>contig_2 Average coverage: 277,63
TGGAGAACGAAGAGGAGATGGGGCTCTAGTAGACTTTGCACTGGACGAAGAAGATAACTT
TTTGGATGCAGTTGAAGGAAGACTATTTGAGGTGGAAGAATCATCTATGTCACTGGGAAG
ATCCCAGACAGATTCACCGCACCAATTGTGTATTTCTACTGTTTCTTTTTTATTTGATTT
CTTTTCTCATTTTTTTTTTGTGATGATAGTGAGCTCTGTAAGGAAGATTGAGTTGACTGA
GTACTGGTTTTGGAAGATTTTGGTTTTCTTGGAATTAATATTTTATCGGTAGGTTCTGTT
TCAACAGGCAGCATTTTAAAATTGTCCGCATCAATTGGCCAAGTCATGCGAGTTTGTGTA
TTCTCGTGACTGAATGAGCGGACAACTTTGCTGGCGTACGATGGTCTGTTTGAAACAAGG
AGATCATTCGAAACAGAAGCTATCTGTTTAGCTTCTGGGTAACTAATGTTTCTTTCTGTT
TTAATTTTAATAATATTTTTTTCTTTAAGGTAAACAGGGCAGTCCCTAGACGATGAAAAA
TGGGATTCACCACAGTTTACACATTTAGAAGATTCAGAGTGACAGTTTGTTCCCTCGTGT
CCTTCGTCAGAACACTTGAAGCATCTCTGCTTACCACGACATTGTTTGCTTCCATGACCA
AACTTTTGACAAGTAAAGCATCGAATTGGGTTTGGGATAAACATGTCAACTCTGATTCCG
AAGCAACCTAAAGTAATAGATGGAGGAGGAGTTGGAGTTCTAAAGGTCAAAAGATAAGTA
TTTAATTTGATTATATTTCCATTCTTTTTAATTTGAA
>contig_3 Average coverage: 222,42
GGTGATGATATTGAGCTCTGTAGGGAAGATTTGAGTTAACTGAGTACTGGTTTAGGAAGA
TTTTGGTTTTCCCGGAATCAATATTTTATCGGTAGGCTCCGTTTCAACAGGCAGAATTAA
GGTAAACAGGGCAGTCCCTAGACGATGAAAAATGGGATTCACCACAGTTTACGCATTTAG
AAGATTCAGAGTTACAGTTTGTTCCCTCGTGTCCTTCGTCAGAACACTTGAAGCATCTCT
GCTTACCACGACATTGTTTGCTTCCATGCCCAAACTTTTGACAAGTAAAGCATCGAATTG
GGTTAGGGATAAACATGTCAACTCTGATTCCGAAGCAACCTAAAGTAATAGATGGAGGAG
GAGTTGGAGTTCTAAAGGTCAAAAGATATGTATTTAATTTGATTATATTGCCATTCTTTT
>contig_4 Average coverage: 475,83
TTACTTTGATTTTAGTGTATAATTACTCATCAATTGAGGTGCTCCTGAATTGGAGGAAGA
TTCTAAAAACAGAACTTTACAGAAACAATGAAAACTGCCGTTTCTCTCCCCAATCTCATG
TATCCCCATTGACATTGTTTACCGCGAAAGTTGACCTACAAATTATCTGATTATAGCCTC
AGATTAAAGCATTGCATGTTGGTGTGTGAATCATCTACACTACAGCAAACATCATTAGGT
TTACATTTAACAAATACGGATTTTAAATTAGTATACAAATACTGTGAATGATTTTTATAA
TGAATAAAGGATATCCCTGTGTGGCATTCCAACAATGACGTCACTAGGTTAGATATATTT
AGAATATTTCGTAATACTGATTTTTCCGGACTGTAAAAGAAACGTATATAGTGTAAGGGA
AAGCTCAATATACGATAATTTCACGAGAAACAGAAGGGAAATGTGTAAAAAATGTATTTA
AAGTC
>contig_5 Average coverage: 297,32
AGCAACTTTGGTAGATGTAAAATTTGGCGTTGGAATTTCCAAAATGTCTGCCGTTTCCAT
GGAAACAATGCAAAAAGGTCAAAATGCTCCAAAAACTTCCGGGTTTGGTGAATAACTTTG
GTATGCTTGAACTTAAAATCATCAAATTTTTATACCATATAGTTTTCCACTATATACAGG
TTTTGAATGATTATGACAATCATTGGAACTACTCTGTTACCATGGATACATGATCAAATA
TTTCAAAAATTTCAAAATGCTCCAAAATTGATCAAACTTAATATTATTGT
>contig_6 Average coverage: 766,66
CCTAAAGTAATAGATGGAGGAGGAGTTGGAGTTCTAAAGGTCAAAAGATAAGTATTTAAT
TTGATTATATTTCCATTCTTTTTAATTTGAAATCTAATAACATTAGTTACACCTTGGCTT
GAAAGTTCCTCACCGATTTCTTCCACGGTAAGGTCACCAAGGTATTGACTTCTGTCTCGA
ATGATCCCCTTACAGCTGTTCAAACTGTTATGAGGAGAGGCAGAAACAGGAAAGTTTGAT
ATTGTAGACATTGTAAGTAAATTTGTTGATTGACTTTTGTTGGAACATTCAACCAACAAA
TTGCCAGATCTCATTTTTGAAACTTTTTTAACAGTACCAGCAACGCTTTGAATTTGTTTG
TGAATTACAAAGGGCGATATTTTTGAAATTGGTTTTTCTTCTGTTCCTTTTATTACAATA
AATCTGGGCCAACTGTCATCTTCCCGACAGGGCTCTGAATCATCACATTTTCTTTTCTTA
TGTATTAAAGCTGATTTAGAGGGTTTGTTTTGTTGTGCCATATGAAAGGAGAAAGATTCA
CCATTCTTGCCATCCACCCACCTCGGAGTGCCTACAAGGGCGATGCTGTGTTTCCGTGGC
GAACCGGGATCGAGTGCTAATGCTGAAAACGAGCTCCAAATATAATGTAGCTGGTCCTCA
AAATCAGCACCCAAGATCCACTGCGGAAAGCACCAGATGTTCCAAGAATAGTATACTCAA
GCAGAGCGTATCCATCAAGCG
>contig_7 Average coverage: 531,16
CCTAAAGTAATAGATGGAGGAGGAGTTGGAGTTCTAAAGGTCAAAAGATATGTATTTAAT
TTGATTATATTTCCATTCTTTTTAATTTGAAATCTAATAACATCAGTTACACCTTGGCTT
GAAAGTTCCTCACCGATTTCTTCCACGGTAAGGTCACCAAGGTATTGACTTCTGTCTCGA
ATGATCCCCTTACAGCTGTTCAAACTGTTATGAGGAGAGGCAGAAACAGGAAAGTTTGTT
ATTGTAGTCATTGTAAGTAAATTTGTTGATTGACTTTTGTTGGAACATTCAACCAACAAA
TTGCCAGATCTCATTTTTGAAACTTTTTTTAACAGTACCAGCAACGCTTTGAATTTGTTT
GTGAATTACAAAGGGCGATATTTTTGAAATTGGTTTTTCATCTGTTCCTTTTATTACAAT
AAATCTGGGCCAACTGTCATCTTCCCGACAGGGCTCTGAATCATCACATTTTCTTTTCTT
ATGTATTAAAGCTGATTTAGAGGGTTTGTTTTGTTGTGCCATATGAAAGGAGAAAGATTC
ACCATTCTTGTCATCCACCCACCTCGGAGTGCCTACAAGGGCGATGCTGTGTTTCCGTGG
CGAACCGGGATCAAGTGCTAATGCTGAAAACGAGCTCCAAATATAATGTAGCTGGTCCTC
AAAATCAGCACCTAAGATCCACTGCGGAAAGCACCAGATGTTCCAAGAATAGTATACTCA
AGCAGA
>contig_8 Average coverage: 73,41
TAAGGGAGTTAAAACTTTAATTTCTTTATGATTCGTATATTTAAAAAGATTTTTTATTAA
TAATGTCAGTACCGAAGTAAAAATTAAAAAAACGAAAACAAAACGTTTTTAATGTCATGC
ATCCGACGCACTTTTCTGGAAGTACTATCACGAGGAACGCCGACAGCCGAATATTTGAAA
ACACGGGATGTATACAAACGAAAATGGTTGAAGAGCTATTTATTACAAATCACTAAAAAG
TATGTTACAATTGAATATTAACAATGGCGTTAGAAGCGCCCTTTTTATGTAAAAAAAATT
AGAAATAATTATTACTTCGTATCAACAGATTGGTCGGACATTGGATACAGCTTT
>contig_9 Average coverage: 225,15
TAACAGGCAGCATTGTAAAATTGTCCGCATCAATTGGCCAAGTCATGCGAGTTTGTGTAT
TCTCGTGACTGAATGAGCGGACAACTTTGCTGGCGTACGATGGTCTGTTTGAAACAAGGA
GATCATTCGAAACAGAAGCTATCTGTTTAGCTTCTGGGTAACTGATGTTTCTTTCTGTTT
TAATTTTAATAATATTTTTTCTTTAAGGTAAACAGGGCAGTCCCTAGACGATGAAAAATG
GGATTCACCACAGTTTACGCATTTAGAAGATTCAGAGTTACAGTTTGTTCCCTCGTGTCC
TTCGTCAGAACACTTGAAGCATCTCTGCTTACCACGACATTGTTTGCTTCCATGACCAAA
CTTTTGACAAGTAAAGCATCGAATTGGGTTAGGGATAAACATGTCAACTCTGATTCCGAA
GCAACCTAAAGTAATAGATGGAGGAGGAGTTGGAGTTCTAAAGGTCAAAAGATATGTATT
TAATTTGATTATATTTCCATTCTTTTTAATTTGAAATCTAATAACATCAGTTACACCTTG
GCTTGAAAGTTCCTCACCGATTTCTTCCACGGTAAGGTCACCAAGGTATTGACTTCTGTC
TCGAATGATCCCCTTACAGCTGTTCAAACTGTTATGAGGAGAGGCAGAAACAGGAAAGTT
TGATATTGTAGTCATTGTAAGTAAATTTGTTGATTGACTTTTGTTGGAACATTCAACCAA
CAAATTGCCAGATCTCATTTTTGAAACTTTTTTAACAGTACCAGCAACGCTTTGAATTTG
TTTGTGAATTACAAAGGGCGATATTTTTGAAATTTGG
>contig_10 Average coverage: 3,99
ACAATAAAGACGAGATCTATATACTGAATGACACATGCCATTAATTTGTAGGTTGTTGCA
AAATTGATGATTGAGAAAAAAATCTGTGGCAGCATTGTCTTCATTTCCAGTTTGTGTTCG
ACGTTTGCAATGGACAAACTGAGCGTGTACAGTTGCACGAAGTCCGCAATAGACATGTTA
ATAAAATGTATGGCCCTCGAACTTGGACCTCACAAAGTAAGTATGAATCTAAAGATATCT
ACAATTAACCGTTTAAGAATCTAAAGTACTATCATGGTTAATTTTATTCGTAGTACCCTT
AAATGAAAATAACGTCGTGTCATTGGTTTAATTTTCATAGTGCAGGAAATTTTGTACCAA
TCACGACGTCTTGGTGTACATTAAAAAAAAACCGCATTAGATTTTGAAAAGATGAATTGA
AAGATTCAAGAATTTATTCTTCAGTTTTAAAGTCAAAGTACAGGTATAATCAGCTGTTTT
TTTAGTGTGCATTGTCTTTAAATTAAATTAAATTATTATTCTACCATTTACTGTTTAAAA
TAATTGTTTATTAAGATAAACAATCTATTATTAAGTTTTCAACGAGTGTAAAGTCTAATG
AGATTAATATATTAAAATGTGATTTAGCGTTGATATCTTCTATCTCAATTGAGATTTAAA
TATTTATTTTGAAAGATATAGTTTCTTCTCACAATTAAAAAAAAAAGATATTCTG
>contig_11 Average coverage: 56,15
AACAGCATTTGTAATTTCACTTAACAATAACAAACTCTCGACTGGTTTCTTGTCATTAAA
CGTGTGACAACAGGCAGACGATGCAAGGGCGAAAACATGCCTATAACAATACGATGTTAA
ACATTAAAAAAAGTGATATATTTACAATAATGTTTTATACCACCTTTGTTCATGTAAAAA
CAACACCAAATTGTATGATAAATGTTTAATATTTACAGACTGGGCAGACATTGGTTACAG
CTTCCTTGTTGGTGAAGATGGGAAAATCTATGAGGGCAGAGGCTGGGATAAAGTAGGGGC
TCATACTTCGGGCTATAACAGCCAAGGGTTAGCCGCCTCATTTATGGGAAATTTTGCGAC
CCGTGCTCCCAATTCTGCTGCTTTAAATGCTGTCAAAAAGTTGATTCAATGTGGAATCAG
CAAAGGAAAGTTTCGCATTCTTATGCCTTGTTTGGACATCGCGATGTTGGATCCACT
>contig_12 Average coverage: 2.412,30
CTTCATACTTTGTATATAGATGCCTCATGTTACGAAGTTTCCGTCAGTCACATGTCCAAT
GTCCTTGACCTCATTTTCATGGTTCAGTGACCACTTGAAAAAAAAGTTCAGATTTTTTGT
AATGTTGAATTCTCTCTTATTATAAGTAATAGGATAACTATATTTGATATGTGCGTACCT
TGCAAGGTCCTCATGTCTGTCAGACAGTTTTCACTTGACCTCGACCTCATTTCATGGATC
AGTGAACAAGGTTAAGTTTTGGTGGTCAAGTCCATATCTCAGATACTATAAGCAATAGGG
CTAGTATATTCGGTGTATGGAAGGACTGTAAGGTGTACATGTCCAACTGGCAGGTGTCAT
CTGACCTTGACCTCATTTTCATGGTTCAGTGGTTATAGTTAAATTTTTGTGTTTTGGTCT
GTTTTTCTCATACTATATGCAATAGGTCTACTATATTTGTTGTATGGAATGATTGTAAGG
TGTACATGTCTAGCGGGCAGATGTCATGTGACCTTGACCTCATTTTCATGGTTCAGTGGT
CAAAGTTAAGTTTTTGAGTTTTGGTCTTTTTATCTAATACTATATGCCATAGGTCAACTA
TATTTGGTGTATGGAAATATTTTATGATCTTTATGTCAGTCGCGCAGGTTTTATTTGACC
GTGACCTCATTTTCACGGTTCATTGCACAGTGTTAAGTTTTTGTGTTTTGGTCT
>contig_13 Average coverage: 644,15
GACTACTTATCATATACTAAATGTCACATTTTAAGTGTTCAGAAACATTTACTTTGATTT
TAGTGTATAATTACTCATCAATTGAGGTGCTCCTGAATTGGAGGAAGATTCTAAAAACAG
AACTTTACAGAAACAATGAAAACTGCCGTTTCTCTCCCCAATCTCATGTATCCCCATTGA
CATTGTTTACCGCGAAAGTTGACCTACAAATTATCTGATTATAGCCTCAGATTAAAGCAT
TGCATGTTGGTGTGTGAATCATCTACACTACAGCAAACATCATTAGGTTTACATTTAACA
AATACGGATTTTAAATTAGTATACAAATACTGTGAATGATTTTTATAATGAATAAAGGAT
ATCCCTGTGTAGTGTGGCATTCCAACAATGACGTCACTAGGTTAGATATATTTAGAATAT
TTCGTAATACTGATTTTTCCGGACTGTAAAAGAAACGTATATAGTGTAAGGGAAAGCTCA
ATATACGATAATTTCACGAGAAACAGAAGGGAAATGTGTAAAAAATGTATTTAAAGTCAA
TCTGTTCTCCTTGTCATCAATTTCAGTATGACATTTTGAGGGGGTTTCCAAACTATCAAA
ACAAAATGATTGACGTGAGGGAATGATACTCTGGCCAACCCCATTAGGGAATTGACGGCT
TGAAGCCGTCTTTCCCCAAAAACAGATAAAATTGAATATTTGTGTAATTGCCAATGTAAT
ATAAAGAATCACTATCAAAGAATTCAAATATTGAAAAGAATATTCAACTGGTGTCTGTTC
AACATTAATAATATACCTGATGAAATAAATAATATATATCATCTTTTTGTTTAATTATTT
GTAGGGCATTAAAAAGGCAAACAATAGGTTTCCGGCCAGAGAGTATGAGTTCGTGTGCTT
CGATTAGACACTACAACGTCAAACTATAAAAG
>contig_14 Average coverage: 2,92
TTTTGAAATGTCGGTTTGCTGTTTCATAGACATATAATCACAAAGTATACTTATAGTCCT
ATTTAGCAAAGCTCTGTTCGAAACACTAACTTGGGTCGCTTGAATATTCCAATTTTATTA
AACTAATAAATTTAAACTGAAATTAAAAATAAATTGAGTCTCATTTTTCAACATCGATTC
GCCGTGTCTCTTTCACTTTAATGTGATATCTTAGTACCCTGCGTTATGAATAAGATGTCC
TGTCTAGGTTTGTCATCATCTTATGTTTACTTACAGACGTTGGGGGTTTCAGGTTGAATA
AACTTTCAAAATGTTAA
>contig_15 Average coverage: 506,66
TTTGGTATGTGCGTACCTTGCAAGGTCCTCATGTCTGTCAGACAGTTTTCACTTGACCTC
GACCTCATTTCATGGATCAGTGAACAAGGTTAAGTTTTGGTGGTCAAGTCCATATCTCAG
ATACTATAAGCAATAGGGCTAGTATATTCGGTGTATGGAAGGACTGTAAGGTGTACATGT
CCAACTGGCAGGTGTCATCTGACCTTGACCTCATTTTCACGGTTCAGTGGTTATAGTTAA
ATTTTTCTGTCTTGGTCTGTTTTTCTCATACTTTATGCAATGAGTCTACAATATTTGTTG
TATGGAATGATTGTAAGGTGTACATGTCTAGCGGGAAGATATCATCTGACCTTGACCTCA
TTTTCATGGTTCAGTGGTCAAAGTTAAGTTTTTGAGTTTTGGTCTTTTTATCTAATACTA
TATGCCATAGGTCAACTATATTTGGTGTATGGAAATATTTTATGATCTTTATGTCAGTCG
CGCAGGTTTTATTTGACCGTGACCTCATTTTCACGGTTCATTGCACAGTGTTAAGTTTTT
GTGTTTTGGTCTATTTTTC
>contig_16 Average coverage: 35,82
AGATTCCTAAAGCATTGCATGTTGGTGTGTGAATGATCTACACTACAGCAAACATCATTA
GGTTTACATTTAACAAATACGGATTTTAAATTAGTATACAAATACTGTGAATGATTTTTA
TAATGAATAAAGGATATCCCTGTGTGGCATTCCAACAATGACGTCACTAGGTTAGATATA
TTTAGAATATTTCGTAATACTGAATTTTTCCGGACTGTAAAAGAAACGTATATAGTGTAA
GGGAAAGCTCAATATACGATAATTTCACGAGAAACAGAAGGGAAATGTGTAAAAATGTAT
TTAAAGTCAATCTGTTCTCCTTGTCATCAATTTCAGTATGACATTTTGAGGGGGTTTCCA
AACTATCAAAACAAAATGATTGACGTGAGGGAATGATACTCTGGCCAACCCATTAGGGAA
TTGACGGCTTGAAGCCGTCTTTCCCCAAAAATCAAGTA
>contig_17 Average coverage: 3,71
AATTTTGTCTCACAAAAGTCAATTTTGTCTCACAAAAGTCGATTTTGTATGCAAATTAGT
TCACAGAATCAAAACTAAACAAATTTGAATACAAAATTGACTTTTGTAAGACAAAATTCA
AATTTGTCAGTTTTGTCTCACAAAAGTCAATTTTGTCACACAAAATTGACTTTTGTGTTT
TAATTTCCATATCAGGTAACAAAAGTCAATTTTGTATGCAAATAAGTTTATATTTGCATA
CCTTTTTGACAAAATTGACTTTTGTCATGACAATAAATGAATTTTGTCTACAAAAAATGA
ATTTTGTCATCACAAAATTGAAGTTCTCATAAAACAAGTCTGTATCACATAGTTTTGTAA
GACAAAAATGATTTTGTTATGACAGAATTGAATTTTGTACAAAACCACAAGAGTCCCATT
CGGCGCCCCGTAATATAGTATTATATAAATAGACCAAAACTACAAA
>contig_18 Average coverage: 426,44
AGACCAAAACACAAAAACTTAACACTGTGCAATGAACCGTGAAAATGAGGTCACGGTCAA
ATAAAACCTGCGCGACTGACATAAAGATCATAAAATATTTCCATACACCAAATATAGTTG
ACCTATGGCATATAGTATTAGATAAAAAGACCAAAACTCAAAAACTTAACTTTGACCACT
GAACCATGAAAATGAGGTCAAGGTCACATGACATCTGCCCGCTAGACATGTACACCTTAC
AATCATTCCATACAACAAATATAGTAGACCTATTGCATATAGTATGAGAAAAACAGACCA
AAACACAAAAACTTAACTATAACCACTGAACCATGAAAATGAGGTCAAGGTCAGATGACA
CCTGCCAGTTGGACATGTACACCTTACAGTCCTTCCATACACCGAATATACTAGACCTAT
TGCTTATAGTATCTGAGATATGGACTTGACCACCAAAACTTAACCTTGTTCACTGATCCA
TGAAATGAGGTCGAGGTCAAGTGAAAACTGTCTGACGGGCATGAGGACCTTGCAAGGTAC
GCACATACCAAATATAGTTATCCTATTACTTATAATAAGAGAGAATTTAACATTACAAAA
AATTCTGAACTTTTTTTTTCAAGTAGTCACTGAACCATGAAAATGAGGTCAAGGACATTG
GACATGTGACTGACGGAAACTT
>contig_19 Average coverage: 245,67
TGTGTGCCTTGGCAGTCACGAAAGGAGAAAGATTCACCATTCTTGTCATCCACCCACCTC
GGAGTGCCTACAAGGGCGATGCTGTGTTTCCGTGGCGAACCGGGATCAAGTGCTAATGCT
GAAAACGAGCTCCAAATATAATGTAGCTGGTCCTCAAAATCAGCACCTAAGATCCACTGC
GGAAAGCACCAGATGTTCCAAGAATAGTATACTCAAGCAGAGCGTATCCATCAAGCGAAA
AAGAAAGCGTACCACTTGATTGACCCATGAGCCATCGCCTTCTTCAGTTATCCGAAATAT
AAATAGCTTAATTTAAAATACATGTGTATATTATGAAAATTGTTACAAGAAAGCTTATTG
TTGAGGATTAACTGAAGGGCTCGACATGACCAGCCGATTGATCGAACCGGGTCCATCCGA
CCTCCCGTTTAGATGATATCGAAGCCAAAGCAGCTT
>contig_20 Average coverage: 16,26
TATATACTTATGATCTACCATAAATATTGGTATTGGTCTGATGTTAATTCTAGGCTAGTA
ACTAATGTTTAATCTTTCTATAAACAATTTTTATCAACATATACGAATATAGAAAGTTTC
AATTTTACGAGTTAATTGAAATAAGCAGTATCTTTTTCCCTTTTCAATGATCTTTAATAC
TTTTTATCATAATATTATAATGGATATTGGTATCATTTAGCGAGTAAAAATATTTAATAT
GTAAAATTTTAGTGTTTTAAAATATTTCTCGGAATGGGTTTTCCCCCATAGATTCATTAT
TTATAGAATATTTTTCACATAATTTGTCAAAAAAGATGCATTTTGCTCCTATTTGCAAAC
ATGAATGACATCATTCAGCCAATGATTGACCAATCAGGCAACCAGGAAAGTGCCCCTATG
CGCACGCTTGTCGGAATTTGGCGTGGAATAGGGTAGTCGGCCATTTTGTTTGACTGACTA
ATCAAAAGGATTATTTTTGGATTTATTTACACACTTTTGATCCTCAGTAGGGATCTGTGT
TGTACAAAAAAACATTTATAAACAATGGAAATTTGTAAATATTACAATTAAATGTGGAAA
CCATGTCCGAGTGACAAGAAAAATTGCTGTTTCCACACAGTCAAGGGCACCGTTTCGGCA
CCCGTTGCTGTATGAATGCACGGTTATACACGAAAATACCTATTCTATTTGACATTTACA
ATAACATTAAGCTTTAATTTTTATCAGGATATAGTCAAAGTTACATAGTGCAATTAATAA
ATGTCATCTATGATACTACGAAAAGTACGGAATCAGCTGATTACTTAGACCCTTCGATCG
ATTAGAAACCATAATTTATTCAACATGTCGACACGAACGCCTTTGCAGACCGTTCATGAG
TCGGTGACAATTGATCATAGGGTATGTAGCCTTTACATTTCTGCCCATGAGTACTTGGAA
TATCTGCCAAAATACGTCCAGTACCTAAATGTTTTTATTTTTACTCTTTCAGCAAACCGA
CGACAACGCAAATCCCCGGATAACGTCGTCCAGGGCAAGGTCTGATGAGCCACACATAGG
AAAATATCGTCTTATAAAGACAATTGGAAAGGGAAATTTTGCAAAAGTAAAGCTAGCAAA
GCATGTGCCAACAGGGAGAGAGGTTAGTATTTTGTTTTGTTTACCAATTAGATGAAATAT
CTAGTATCCCAGTGACAGTTCACGGAAACTAATAGTCCTGTCATTCTGACCATCA
>contig_21 Average coverage: 12,57
TTTTAACTCTTAAATTTTTCCTAAACAAATCACATGGTATGTGCGTGTGATGTTATAAAA
TAAATGTATAGAAGCAATATATAGTAATAGAAATAGTTGCCAATACAGATAAAGATAACA
ACCAAAAATCAAATATTTTCCCTATCTTTAGTCTAACAATAGCTGATATGACCTTGGCCT
TTTACTTATTGACCCCAAATTCAATAAAGGTCTTCCTCTACCTATGGGGCCTTGGCATGC
GGCGGATGCCAAGTTTGTTAAAGTTTGAACTGTGATTTTGTATCTAAAATACCTAAAACA
ATTGCCTAGTTTCCTACTGCACAATACAAAGTAGATTGGGAAATATAAAATTTGACCCCT
CCATCCAACATTTTTTTTATCAGTTTTTGAATCAGTTCATGATTCATTTAGTCAGTTAGC
TAACTCAAGTACATTATTTCCAATTGCAATCTTATGTTTATATAAAACCATCTGAAAATT
TGGATTTAGTTAAGACAGGTTATACCTAAATCTGAAGTGCTATTGTCTTTTTTTGTTTCA
TCTGTCTTCCTCCCAGCTGTGAAGTCAAATCCTGCAGAGGAACCTGTGGTTGTAGAAAAA
GATTCAGAACCAAAGGTAGAGGTCCCAGTTTGTCCAAACTTGGAGGAACCAGTCTGTCCA
AAATTATAACCAGTAGAGGGGGTGTTACTAGTCTTGCTGCTGCTTGCAGACGATACTTTC
TCTGATAAATTTGTTGCTGTGGCTGCATTTGATTTAAAGGCAAATCCATTTGAACTTTTG
GGAATGGCTCCACCTGTTGAATCTGTACTACCTCCAAATGAGAATCCTTTTGTTGTATCT
GTGCCTCCAAATGAAAATGATTTGGCTGCTGTGCTGCCGTCCGATGGTTTTGGAGACCCA
AACAAATTTCTGCTTGTTACCACTGGGCTTGATCTGGGCATGTCAGGTCTTACAGAGGAT
AATGGAGTTGATGTTACCTTCCCTGAAATTACAAAAGATGGATGTAAGTAGAAAATACAA
AAAACGGATTTAAGTAAATGATTTCTTTATCCAGTTTTTCTTAGTACCTTTTTTTATTCC
ATTGATGAGAATAAAATAGGAAATGTCAGACTTGTCAGTTATAAAAAAAACTTTTTAACT
CCTACACATGTTTAACAGATAATAACATCAATGGCACAAATAGTATCAACAATACTAATA
CCATTAACAGGACCAATAACACAAACGATACCAATAACATAAACGATACCAATTAAAAGT
AATAATTACTTCAGCATTGTAATCATGGTAATT
>contig_22 Average coverage: 1,84
TGTTTTGTTGGAGAAAATGTGGACAAAGATCAGTGTGGAACCATTATCTAGAGTGGAATT
AGAGCAGGTTTGATAATATATTAAAAAATAACATAATTCCAGAGGATATTAGAAAAATTA
ATCATCCCTTGTGTTTAAATAAATCTCCATAGTTTGCTAGGGTCCTCAGTGGTAGAGTGG
TCTAAGTAGTTACTACAGTAATCACTAGCCAGTCAACACTGAGGTTGTGAGTTCGAAACC
CGCACGTGGCATGTGGGATCGACTCCAATCTTAATGTTTAAGATTATTAGTTTTCTATAG
GAAGGTCGATGATTCTCTCCCGGCGCTCAGGCGTCTTCTAACAATAAAAACTGACCGCAA
CAAAATAGCACAATAGTGATAAAAATGGTGTCAAACACCAATCAATCAACTAAATTATCG
AATAATTAATCAGGCCAATTGAAATTTTAAGAGCACCTTATTTGCTTGTTTCGTGTTTTC
CAGAAAAGTGCTTCGGACGCACGAATTTATTA
>contig_23 Average coverage: 8,01
TAGTCAGTCAACACTTAGGTTGTGAGTTTCAAACCCCGCTCCTGTGAAATTGACAAAAGA
TTGTCAGTTTTCCTATTGAAGGTCGTCAGGTTTCTCCGTGCAATACAGCTTTCTCCACCA
ATAAAAACTAATCGCCATGAAATAGACTACCGTAAAAGTGGTGCTCAAAGTGGCGTTAAA
ACACCAAAAATCCAATTTATGTCAGCTGACACAATATTTTATAGCCAGGTAATCTGTCAT
GTTGTAAGTTTTATAAGCAAAATTTAAATCAACACTGAAATGGATATAATTTATTTTTAC
AGACATGACAAACCAACAGACCCTGATGATCCACTTGCTGATCAGAACATAAAAGATAGA
TTTTATTTT
>contig_24 Average coverage: 159,42
GAAAAAAATCTATATTGGCCGAGTTATTCTGTATTGGCCGAGTTTACACCTTATATTGCA
TAGGCAGTTTTCATCATATTAAGTCCAATAACAGTGTAGTTAATTAATAAAGTAGATTAA
CAGCAGTTCTAAATATATGAACATTAAACTAACAGTATGTTATTAATCTAATACATATAT
TACATGCATACAGCATAATAAAGCTGGTTTAATTTGAATGACTATCCATTAGGGACATTT
TTCGACGATAATTAATCAAATCTGACAAGTTTAATTAAAAACGGAAAATAATTCTTCGCC
CGTAAACGATTTAACGTTACCGTACCCTCTTTATTTTTGTTGCATTCATGTCGCATGTGT
GTCGGCAGTGTCAGCGCTTCTAATAGCTAACTTATTTTACACAAAATCGTTGACATGGTA
GAAGGAAACTATAGTACAATATAAGCTGAGCTGGAAATTGCAATTGGTGAGTAGAAATGA
ATATTTTAATACATGTCTATCAGAATAATCATTGATCATGGATCATCACCCAAGAGTTTG
AAGGAAAAATGTTCACATTTGTTAAATTTGTGCATACAGGTATGAATCGACGTTCCAATA
CTCCACACTCTTGGATAGTAGCCTGTTCAAAGGCAAAGTAAGAATTTGGGCTTGTTAAAA
AATTGTTCCTGTGATTGGACCCCCCCCCCTTTTTCATGTTTTTTGGAAGATCAATGCATG
ATTTAAAAAGTTACATATAAACTAGTATGGTTTAAACCCCCTTTTAAAAATGGCTGGATC
CACCCCTGTTTATTGCCTAACATGCATTGACATGTGGGGTATTCACAATGGTATGGTTGT
GCGGGATGGCCTATTACAACAGTTACAAGACCTAAACCCCTGATCGAGTAATCCTACATA
TTGTATGTTAATGTATTGATAACTGTCACGTCCTAAATTTGCATGAAATATTTGTCACTT
TTTTTTATTAACCAATAACCAACCAATCTTCACATGTTACGATGTAGTCCGAGACAAGCT
TGTCTGGCAAAACAGCCGTTTGGACGTCAGAGTAATCT
>contig_25 Average coverage: 226,60
CCAGGTGTCTTCAGCATTTTCTCATCTGATGAATTTTTCTACCCTTTTCAGTTACTATAA
AGTGTTACAACTTAAATTTAGACGCAACACATAAATAGTAATTGGAAAGGTACTGCCATT
GCATGTGTTATGCAGAAACTAATTTAAAATCGATGTGTACAATCGTGAAATTATGAGGTC
GTCAAGAAATGAACTTTGTGATAATCTACTCGTTCCCCAAACCTGAAATAGTTCTATCGT
CCGTCTGCTTTCAAAATACCTTTTAAATGAATGTGACCGTCTTTCGCCTGAAATGTATGC
CATACTGACATTTTCAGCATGTTTAAGATAACTAAATGACAACTGCGTCTTCAAAACAAC
TGTTTACTTTCAGTTTGTGTTTATCGTGACTTTCGATGTAAAATCTAGAGACGTTCCGAA
ATCCTGCACTTGTGTCAACTCGGCCAATATAGAATAACTCGGCCAATACAGAAAAAAATC
TGTATTGGCCGAGTTATTCTGTATTGGCCCAGTTTACACATTATATTGCATAGGCAGTTT
TCATCATATTAAGTCCAATAACAGTGTAGTTAATTAATAATTTAGAATAACAATATGCCA
TAATAATTTGAACAATTTCATACTTAGGACTGCTATATGAAATTGTGTTGCAATCCTCCA
AAATTTTATTTAACTTATTAACCGGTAACGAACAGAGTTTTGTAAACAGATAATGTCTGC
CGT
>contig_26 Average coverage: 8,54
TTTTCATCATATTAAGTCCAATAACAGTGTAGTTAATTAATAATGACTTATATTTCTATA
GAGCTTATGTTTGTAATGTTCATGTAAACAAGACTTGAAATAAATTTTCTATTCTATTTT
TACAGGATTCTTTCAACGAGTTGAAAAACTGAGGAAAAATGCTTTTGGAAGTATGTGTAT
ATTTGGAGAAGATAACAAAAACAGTATATCAGGTGTATGGTTCTGGAAAGGACCCAAATT
AGCATTTGAG
>contig_27 Average coverage: 4,17
ACATACTTAATATAGTTATCCTATTAATTATAATCAGAAAGAAATTAACATTACAAAAAA
TATTTGTTTTCAAGTAGTCACTGAACCATGAAAATGAAGTCAAGGACAATGGAAATATGA
CAGACGGAAACTTCGTAACATGAGACATCCATATACAGAGTATGAAGCATCCAGGTCTTC
CACCTTCTAAAATTTAAAGCTTTTAAGAAGTTAGCTAACGCCGCCGCCGCCGACGACTCA
CTATCCCTATGTCGAGCTGTTGACTGGCAAGTGATTAATTACATCGAGGCCCTAATTGTG
TTTAGAAAATATATATCTAAGAAAATTTTCACAGAATAATACCGGACCAGGTCACACTAG
AAACGATAAATTCTCTTGAAAAACACGATCCCAGCTGGACACTATACCTACTGTGATTGT
TTACTTATAAGTACATTAAAAAAATAAGACACAAACTGTATTTTATATAACAACTTTGTA
TTTGTTTTTGTTTTGTTTTTTCTGTTTACAATTTTGATATTTTATTGTATGATTAACGGA
TTAGAAATCCATAATTTATACATTTTATTTATCATGTATAATCCTAAGAAGTTTTAAATC
TGGGTACAATTTTTGTTTCTCTAATTTTGGTGCT
>contig_28 Average coverage: 994,93
GTTTTTTGTACAAAAAAATGCATTTTACAACTTTTACTGTAGTCGAACTTTACAATGTCA
GACATTTCAAAATTAATCTTCAGATGACTGTTCACATCATGGTTGATCGTTATACGCCAA
AGAATTAGTACTTTGTGCGCAGCCTCCATTCAAACGGATAACCGCATCTTAACGTCTTCT
GATTCCTGCCATAAATCGACTAATTTGTTGCTAAGGTAGCAGCAACCATTTCTGATGAAG
GGCATTGTTTATTTCATGATGTGTTTGAACTGGGGTGTCCTTTCGCGCACTTTCCGCCCA
ATAGTGTCCCATATATGCTCGATATGGTTCAAATCCGGGCTACGATCGGGCCAAGGAAGA
TGAACCGAATTCCATTTGAACATTGGATCTTCCTCCACGATGCTAATTTCCAACTTTGGC
GAGCTCTGCACTACATTGGATACGGAAAACTGTGTGTCTGTTCGTTAGCAAAGGTCTCCG
AAATGGTCTTATCGCACGATAACCAGTAGCGATGAGTCGATCTCGAACAGTTCTTGTTAA
AAGGCTCCTGTATGGCCACCACTCTCTTTTTAGGATTGTCTTGTATGCAATGGGTTTCCT
TCTG
>contig_29 Average coverage: 5,40
AAATAAAAAGAAAATTTCTTCAAACATTTTTTTTGAGAGGATTAATATTCAACAGCATAG
TGAATTGCTCAAAGGCAAAAAAAAACTTTTAAGTTCATTAGACCACATTCATTCTGTGTC
AGAAACCTATGCTGTGTCAACTATTTAATTTTAGATTTAAAAAGTTTGAAGAAGAAATCT
TTAATTGATTTGTAAAATCTTGACATTTGTTTTGTGTAAAAAAAAACCATGTATTGTCAA
AAATTTGATCACAATCCAAATTCAGAGCTGTATCACGCTTGAATGTTTTGTCCATACTTG
CCCCAACTGTTCAGGGTTCGACCTCTGCGGTCGTATAAAGCTGCGCCCTGCGGAGCACCT
GGTTACTTTTCTAGAGATATAGTCCCTTTTACAAATGGAAAAATTGTTGAAATTTTGGTT
TCCATTTTTTAATTTAAGTTTGCCTAAACCATATATAATGAATCTTACTTATACACAGTA
ATTATTGTCACCAAAACACTGATCAAGTTTGAATGTTGGTAGTGTCACTTTTACCATTCC
TTTAGCTTTTACAAAGGTAAAAATTGCTGATTTTTTGTTTTCCGTTTTCTAACTTGAGTT
TGCCTCAACCAAATGTTATGAATCTTATACACAATACTAATTACCACAAAACTTAGATCA
AATTCAATTTGGGTAGCATCACTTTATCTGTTCTGAGGTTTTGTTCCTTCATAACATTTT
ATGTTATGCGATCAGGGGCATCATCTGTGTCTCATGCTGCTCTCATGGACACATTCATCA
TTTATTTTCAACTAGACCATTCCTAATTTAGAGAGGAAACAATAAGTAGGCCTTATTTAG
TCCTACTTGAAGATATTGACTTGATATTTGTTATATAATTTACACCATGACAAGTTATAG
ATCAAGTTAACATTTTGTTCCAGTACAATGATTT
>contig_30 Average coverage: 15,25
GATTATTTTAGAATAAGGGATGGGGGAGGTGAAAAAATGGGGACTGATGAAGGGCAAATT
TTTCTTTTTCTAGATTTCAGAAATTAAAAAGAATTTTTCTTCAAATATTTTTTTTGTAGG
GGATTTATATTCAACAGCATAGTGTATTGCTCAAAAGCAAAAAAATTTTTTAAGTTCATT
AGACCACATTCATTCTGTGTCAGAAACCTATGCTGTGTCAACTATTTAATCACAATCCAA
ATTCAGAGCTGTATCCAGTTTGAATGTTGTGTCCATACTTGCCCTAACTGTTCAGGGTTC
GACCTTTGCCTCAACTAAACATTATGAAACTTATACACAATGCTTATTACCACAAAACAC
AGATCAAGTTTGAATTTAGGTGGTGCCATTTATACAGTTCTTGCGTTGTCCCTTTGTAAC
GTTATATGCCAGTGGGGGCATCATCTGTGTCCCATGGA
>contig_31 Average coverage: 23,75
TTTTTTTTATGGCCCAGAACGAAGTTGTCAGGGCAATATAGTTATACCCTTGTCTGTCAT
TCTGTCATTCGCTCATTCTGCAACAAACCATTACACAGTCTTTTTTTCTAAACACTTTTA
GATATTTGGCTGATTTTTGGTATGTGAGTTAACCATGATGAGTTACAGATCAAGTTTGAG
TTTTGTTCCTCTCCTCTAATTTTTGCGGAAATCAGGCAAACTAGAGGTGTCAAAACGACA
TGAATGGCCCTGTCTCAAAATGTTGGAAAATCTGCAATTTCAACAACAAATATGGACAAA
ACATGATGGTAGTCTCAC
>contig_32 Average coverage: 12,63
GTTTGCCTCAACCAAATGTTATAAACTTATACATAATGCTTATTACTACAAAACACAGAT
CAAGTTTGAATTTAAGTGACGTCACTTTAACCATTCTAGAATTATCCCTCTTTATAAATG
GAAAAATTGCAAAATTTTAGTTTCAGTTTTCTAACTTAAGTTTGCCTCAACCAAATGTTA
TGAAACTTATACAAAATGCTTATTACCACAAAACACAGATCAAGTTTGAATTTTGGTGGT
GTCACTTTTACCGTTCTAGAGTTATGCCCCTTTACAAATGGAAAAATTGCTGAATTTTTT
AGTTTCTGTTCTCTTAACTTAAGTTTGTCTCAACTAAATTTAATGAAATGTGTATATATA
ATGCTTATTACCTCTAAACTCAGTTTAAGTTCAATTTTTGGCAGCTTCACTTTTACAGTT
CTTGATGTCCCTTAATAACATTATATGCTAGTTGGGGGCATTATGTGTGTCCTTATGGAC
ACATTCCCCATTTATTTAAAATTCTTTGTTATTAGAGAAGGTAGAATACCTGGTTGCTTT
ATATTTGTATATAGATGCCTTATGTTACGAAGTTTCCGTCTGTC
>contig_33 Average coverage: 95,19
TACTTAGAAATTCCGAAATGGCTGCCATTGCCATGGAAACAGGCGAAATGTTTAACATAG
AACATTCCAGAACATCAATGTTAAATTTATTCTAGAGACATTTTATGTTAAATGATGGTA
TATAATTATGGTGAGAACAAATTGCAGCAGCAGGTTGACTTTGGAATTTTCAAAATGGCC
GCCGTTACCATGGAAACAGCAAAAATACGAAAAACTTCAAAATGCTTCAAATTTATTGAA
ACTTATAACAAATGTTGCTCAGCTAATGTAGACTTGACTTTTGAGTTTGGAATTTCCAAA
ATGGCCGCCGTTACCATGGCTACCGCTCACCTGGCAATAGGGGAAGGGTGCCATCCGCTA
TTGCTTGCAATCGCAAATCTAGTTATTATTATTATTATTATTATGGCACCCTCAACGGAG
TTGGGGTGACATATTGTTATTCTACGTTTCTTTTTTTTCTTTTATTATTATTTTTATTCT
TCCACACATTTTGTCCACGCTATTTCTCGTAATTGGTCAGACCCATGTTGATGGAACTAT
ACCATAATATGAACCGCCATGTGAAGTTGTGCAAGAGACATTGGAATGGTAAAAAATGGC
CGCCGTTACCATGGAAACTACAAAAATGTAAAAAAAAATACCCAAATTTTAAATCTTTCG
TTGTAAGAGGCAAAGTCTTGAAAGTTTGAGTAAATGTTGGCAGTGGTGCCCCGAGGTACC
AACAGTACTTGGAATTTTCAAAATGGCTGCCATTGCCATGGAAACTGGACAAAGTTACAT
GA
>contig_34 Average coverage: 863,59
ATTTTTAGAAGGTGGAAGACCTGGATGCTTCATACTTTGTATATAGATGCCTCATGTTAC
GAAGTTTCCGTCAGTCACATGTCCAATGTCCTTGACCTCATTTTCATGGTTCAGTGACTA
CTTGAAAAAAAGTTCAGATTTTTTGTAATGTTGAATTCTCTCTTATTATAAGTAATAGGA
TAACTATATTTGATATGTGCGTACCTTGCAAGGTCCTCATGTCTGTCAGACAGTTTTCAC
TTGACCTCGACCTCATTTCATGGATCAGTGAACAAGGTTAAGTTTTGGTGGTCAAGTCCA
TATCTCAGATACTATAAGCAATAGGGCTAGTATATTCAGTGTATGGAAGGACTGTAAGGT
GTACATGTCCAACTGGCAGGTGTCATCTGACCTTGACCTCATTTTCATGGTTCAGTGGTT
ATAGTTAAATTTTTGTGTTTTGGTCTGTTTTTCTCATACTATATGCAATAGGTCTACTAT
ATTTGTTGTATGGAATGATTGTAAGGTGTACATGTCTAGCGGGCAGATGTCATGTGACCT
TGACCTCATTTTCATGGTTCAGTGGTCAAAGTTAAGTTTTTGAGTTTTGGTCTTTTTATC
TAATACTATATGCCATAGGTCAACTATATTTGGTGTATGGAAATATTTTATGATCTTTAT
GTCAGTCGCGCAGGTTTTATTTGACCGTGACCTCATTTTCACGGTTCATTGCACAGTGTT
AAGTTTTC
>contig_35 Average coverage: 482,80
CATTAGACCACATTCATTCTGTGTCAGAAACCTATGCTGTGTCAACTATTTAATTTTAGA
TTTAAAAAGTTTGAAGAAGAAATCTTTAATTGATTTGTAAAATCTTGACATTTGTTTTTT
GTAAAAAAAACCATGTAATGTCAAAAATTTGATCACAATCCAAATTCAGAGATGTATCAG
GCTTGAATGTTTTGTCCATACTTGCCCCAACTGTTCAGGGTTTCGACCTCTGCGGTCGTA
TAAAGCTGCGCCCTGCGGAGCACCTGGTTATATTTAGTGTCCAGTCTATCTAGTAGATGA
AAAAGTTTTTGATGCAGACTGCAATTTAAATGGAAGTGATATTATATGAAGGTTAAATTT
CGTTGGGGTTTTAATTTTGTGGATATATTAAAAGAAATTAAATTCTCCACTAAAATTTCT
GCTTGTACAGTATAATCAATCTATTTTCTAGGTACTTACATCTGAGTATAACCAATCTAT
TTTCAAGGTACTTACATTTGAGTATAACCAACCTATTTTCTAGGTACTTATGTCTGAGTA
TAACCAATCTATTTTCTAGGTACTTACATCTGAGTATAACCAGGCAGACATTGAGGAGGA
GGAAGAAGAAGAGACCCCT
>contig_36 Average coverage: 18,10
TTTGATGCAGACTGCAATTTAAATGGAAGTGATATTATATGAAGGTTAAATTTCGTTGGG
GTTTTAATTTTGTGGATATATTAAAGAATTAAATTCTCCACTAAATTTCTGCTTGTACAG
TATAATCAATCTATTTTCTAGGTACTTACATCTGAGTATAACCAATCTATTTTCAAGGTA
CTTACATTTGAGTATAACCAACCTATTTTCTAGGTACTTATGTCTGAGTATAACCAATCT
ATTTTCTAGGTACTTACATCTGAGTATAACCAGGC
>contig_37 Average coverage: 6,25
GAAATGAATACGCAGACATAACTGCCCCCTTCCGAAGTCCAGTACTTTATTTGTCAGTCT
TATCGTTTTTATGCAGTTAAGCTGCATTATGCGAGCACCCTAGATTTGTGTTCTACCCAA
TAAATCCTGAAATACTTGCCATTGTTATTATCTAGCCTGCTACTATGTTATATATAACTA
ATTGAACACTTTTTTAATACTTTTTATTCTGGATTACAAAAATATGACCAGAAAACCTTA
AATGATCGTCGATTTATACCAAAAGTTTTAAAGTTACACATAGGAAGTAGTGCTTATTAA
GAATCCTTGTGTAGTTC
>contig_38 Average coverage: 4,04
TCATCTGTGTCCCTATGGACACATTCCCCCATTTATTTATATATACAGACAGAATTCGAA
TTACGTTATACAGGGAGTTACTTATACAGATTATCATTAAACTATTTTCAACACATTCTG
TGGTGTCTCCCGCGGGACATCTAGGCCCGGAAACAAGTCAGACCGAGTCAACTCAGACCG
ACTTATAAGTAAAACTTGGACTGTCTATGAAGACAACTTCGTTCTAGAGTTAATTCATTT
ACAAATAGACAAATTGTTGATTTTTTCGTTTCCGTTCTCTTACTTAAGTTTGCCTCACCA
AATGTTATGAAACTTATACACAATGCTTATTACCACAAAATACAGATCAAGTTTGAACTT
TGGTGGTGTCACTTTTACTGTTCTAGAGTTATGCCCCTTTACAAAAAGAAAAAAAATGCT
GAGTTTTCGTTCTCGTACTTAAGTTTGCCTCACCAAATGTTATGAAACTTATACATACTG
TTTATTACCA
>contig_40 Average coverage: 1,38
TAAATAATTTAAAAAAAAACAATAAAATAAAACAACAGAAATCATGAAACCGATATGGTG
TAAAGAGAGCAATGACATTGTTCGAGAAGATTGCAACTTTAGTTTCTTAAAGGGATCAAC
TACTCGCAAGAACCGATCTGAACTTTGCCCTGCATTTCTAATAGTATATGGTTAATTACT
ACTTGGTCGATTTGAAATTTGTATTACGGTCTGTGGGGGTTTTGGTCGATCTAAGAGATT
AGAACATCGGTCAACTACTGTTGTCCTCAATTATCTGTTTTAAAAGTAATTCCTTCCAGT
AATACTGGTGTAGCAATATCTATTCACCACATTCTAATAGTCTACTAAAAGAACCTTACT
ATTAACACTCTTAGAATCAGGGTGATTTTGTTAAGTTAAACGACTCGTCTGATCTTCAGC
ACCAAATCTAGGACAGTTTATAAGCAGATAGATAATACACTAGAAAAT
>contig_41 Average coverage: 2,79
TTTCACGTAATTTATGTCCATTGATGAATTTTCTACCTGTTCAGTGCAACCTACCTACAA
ACAAGCAAATGATACATGACTGGTTCTTTAAACTCATCCCAAACAAGCGAACACTATTTA
TTCGAACTTCTATCCCTGAACGTTTTCCTCATTTGCCTAGAACTTCTGAATAGTAATAAC
AAAGATTTTATTTTATTAACTATAATGTTAAAACGAACTCCATAACTTCATAGCGCACAA
AACCCACAATAATGGATATTGCACTGCTGGAAATGCCATCACCAGGTACACGTAAATAAT
TTAAAAAAAACCAATAAAATAAAAACAACAGAAATCATGAAACCGATATGGTGTAAAGAG
AGCAATGACATTGTTCGAGAAGGTTGCAACTTTAGTTTCTTAAAGGGATCAACTACTCGC
AAGAACCGATCTGAACTTTGCCCTGCATTTCTAATAGTATATGGTTAATTACTACTTGGT
CGATTTGAAATTTTTATTACGGTCTGTGGGGGTGTTTGTGATCTAAGAGATTAGAACATC
GGTCAACTACTGTTGTCCTCAAATTATCTGTTTTTAAAAAAGATTCCTTCCAGTAATTTA
TTTACTGGTGTAGCAATATCTATTCACCACATTCTAATAGTCTACTAAAAAGAACTTTAC
TATTAACACTCTTAGAATCAGGGTGATTTTGTAAGTTAA
>contig_42 Average coverage: 5,22
GGGTGATTTTGTAAGTTAAACGCTCGTCTGATTTTCAGCACCAAATCTAGGACAGTTTAT
AAGCAGATAGATAATACACTAGAAAATTTGAAAATGAAGTGACATTTGAAAAATAATGTC
GTGCTATGCATGAATTAATTTCAAATATTAGCCAATATACATTCAAGATAACATGATAAT
ATTATAATATACTTACATGTTCTATCACCATAAAGAATAACAGCTGATGTGTGATAGCAT
ATTTAGATGTACCTTGTGACGTCATCATATTACAACATGAATTGGTGATGTTACAACGGG
TTGTTTTGCTGC
>contig_44 Average coverage: 5,11
CAAACTTAAGTTAGAGAACTGGAAAAAAAAGTTCAGCAATTTTTCCATCTGTAATGGGGC
ATAACTCTAGAACAGTAAGTGGCACCACTAAAATTTAAAATTAATCTGTAACAGTATTTG
TGATAATAAGCTTTGTGTATACATTTCATTACATTTGATTGTGGCAAACTTAAGTAATAG
AATATTGTGTATAAGTTTCATAACATTTACTAAAGTTAAAGAACGGAAAGCAACTTTTGG
GCATACCTAGGTAAAACTAATGCCCCTCTCTGCTATGGCGGGGGCATAAAATTATATAAA
ATAAAATTCCATGAAACTTCATGAATGATTGTGGCTCATTGTCATGTTAAAACATGACAA
CATATCAATAACCAGGTGCTCCGCAGGGCGCAGCTTTATACGACCGCAGAGGTCGAACCC
TGAACAGTTGGGGCAAGTATGGACAAAACATTCAAGCGTGATACAGCTCTGAATTTGGAT
TGTGATCAAATTTTTGACATTACATGGTTTTTTTTTACACAAAACAAATGTCAAGATTTT
ACAAATCAATTAAAGATTTCTTCTTCAAACTTTTTAAATCTAAAATTAAATAGTTGACAC
AGCATAGGTTTCTGACACAGAATGAATGTGGTCTAATGAACTTAAAAGTTTTTTTTTGCC
TTTGAGCAATTCACTATGCTGTTGAATATTAATCCTCT
>contig_45 Average coverage: 6,33
AAAGGGAAGGAGATTGTAGTTACGACATAAGGAACATATCCAATATCATCAGGGAAACAG
TTATTCCATAATGGTCAACCAACCTGTCATGGCGTCTGTAAACCTCTATCAAGGAAATCA
TGATCTATAGTAAAATTTAGTTCTAAAGTATTTTTTTTAATTTCTAATTTGTATTATAAT
GATTGAACTATATTCTTTACTTTCAGATGTAATATTGTTCCACTGAAGAAGTCATGACAT
TATCAGAAAGAAAAATTGGATTTATTTATTATTTGTTCTGTTAATGATTTTGATTATAAT
AAATTAATTTCAAGTCGCCTACACTTTCTACTAAAAAATGTTTAGGTCAACAGAACAGCA
TATCCTTCTTATTTTATCATAACCAATTGTTAACCAGGTGCTCTGCAGGGCGCAGCTTTA
TACGACCGCAGAGGTCGAACCCTGAACAGTTGGGGCAAGTATGGACAAAACATTCAAGCG
TGATACAGCTCTGAATTTGGATTGTGATCAAATTTTTGACATTACATGGGTTTTTTTACA
A
>contig_46 Average coverage: 3,67
CTTATTACCTTATATTTCGTAAACAAATAATCCTAAAAACAGAATATTAAAGGACATTCT
GCATCTCGCACACATTGCAAAATGATGTAGAAAATAGTTTGCTCATTGGGATTTCGTATG
GATTTATTAATTATTATTTTGGTTCATACATCAAAAGTCATTAAACAAAGATATGTGTGT
ATGTTATCACTAAAAAACAAACGGTCAATGCGTTTGAAGATGAGGATTTGCAGCAAAGAA
ATAGAACTTATCGATTTAGAAGATAATCCAAAACCAGGTGCTCCGCAGGGCGCAGCTTTA
TACGACCGCAGAGGTCGAACCCTGAACAGTTGGGGCAAGTATGGACAAAACATTCAAGCG
TGATACAGCTCTGAATTTGGATTGTGATCAAATTTTTGACATAATATGAGTTTCTGACAC
AAAACAAATGTCAAGATCTTACAAATCTATAGTGCAATATTGTGCAATTAAA
>contig_47 Average coverage: 91,78
CCATGAATTATTTCTTAATTATATTAACAAAGTTTCTTTTAGATAAATGACGAATTAACG
ATCAACTTAGTTTTATCTTCAGTAAAGGAATACTAGAACTCTTTATGTTGTAGACATGGG
TGTACCAGGTGCTCCGCAGGGCGCAGCTTTATACGACCGCAGAGGTCGAACCCTGAACAG
TTGGGGCAAGTATGGACAAAACATTCAAGCGTGATACAGCTCTGAATTTGGATTGTGATC
AAATTTTTGACATTACATGGGTTTTTTTACACAAAACAAATGTCAAGATTTTACAAATCA
ATTAAAGATTTCTTCTTCAAACTTATTTAAATCTAAAATTAAATAGTTGACACAGCATAG
GTTTCTGACACAGAATGAATGTGGTCTAATGAACTTAAATTTTTTTTTTGCCTTTGAGCA
ATTCACTATGCTGTTGAATATTAATCCTCTCAAAAAAATGTTTGAAGAAATTTTCTTTTT
ATTTATGAAATCTGAAATGAGAAAATT
>contig_48 Average coverage: 3,55
TTTTAGAAAGAAAAACTATGTGAAAGCTTAGCTTGGACATTTTCATAGCAATTCAAAATA
ATAACAGTTCCTACAGCATGGAAAGCTCTCCTTTACCCGCTATCTTTGATGAGGGTTTAC
AGTTAGATGATCTACGACTTACTACTTAAGATGACAGAAACCAATCCAAGCCGTACAGAT
AGACGTAGTAGTTGGCGTACCCGCGTTAACATGCACTCCAAAACCATTGTATCATGGGGA
GTGCCGATTAACGTCCGAGGGCTGTATCCTAGGTGTTGGGTGATACGACCTTAATTTCAC
TGCCTCACGGCTTTGGTCCTGA
>contig_49 Average coverage: 2,77
GAAAAATAATGTCGTGCTATGCATGAATTAATTTCAAATATTAGCCAATATACATTCAAG
ATAACATGATAATATTATAATATACTTACATGTTCTATCACCATAAAGAATAACAGCTGA
TGTGTGATAGCATATTTAGATGTACCTTGTGACGTCATCATATTATAACATGAATTGGTG
ATGTTACAACGGGTTGTTTTGCTGCAAATGCAAAATGAAAATGAGCAATGTGTGAAGAAA
CACAAAAGCATTGCACTCTAAAATATGAGCTTGTATTAGTAAAGGTTTACAATGAGTAAC
AACAGTCAAACTCGTACATTTAAAAACTATTTTGTCAAATTGCTATCCCACAAATTTGAC
AGATATAATACACAATATCGTAATGCCTCAGATTATGCTTTTGTCTAGTATTCAAATTCT
ACAAAAAAAATTTGTTACGGTACTAGCAGATTTTTCGTAAATGTATTAGATCGCTTACTA
TGACATACATCCTATGGATAGAAGCATTATATTAACTTTGAAATGAATAAAGGTTTGGTA
AGGAAAACGTGTGCCAAGCGTTTAGAAATATGGGTATTCGTAGGCATCACACATCAATTG
CGGTTTAGCAGTTTTTCCGACTGTGCGAGGGCTGTATAACCAGTCTAAGGTCGTTAAAAA
ACTTCAATTTTGTTTAATATTACTAAGTGTAATAAAGAACAGGTTGGTGCCTGTTAGAAA
TACGGACTTGTACGTTTACAAGTTGAACCGTATTGTACCGCATAGGACAAGTGTGAGTCT
GTGTGACCACCTTGTAAAGTACATAGATTGCAAAGAGCAGTTGTACATATTTTGGTTCAT
TGACGTTAATTTATAAATAAAGATTGTTTGTTATATATTTTGTAAATAGAACAATTTTGG
ATCCAGTATCAAACTGGTAACGAACACATTCTAAATAGAAATAGACACGCTTACCCTGTG
TACACGTTACAC
>contig_50 Average coverage: 79,82
CATGCACCATTTGAAAGCAAGAGACTGAATGGTTTACAAAATTAAAAATACAGGACGGTG
TCCCGTTAAACCAAAAGAACTAAACTGGATGAATATTGTAGGAGAAATCTAGAGGAAAGT
TTTGATTTGTGAAATTGGTTTTCCTGAACAGATGTACATTCATCCTGCAGGAAAGATTTA
TAACTGTCCACCACCAACTGACGAGCTAATGTTGAGCTTCACAGATGGAATTACTCAAAC
ACCATAAATGCCTATGTTTTCAGCACAGATTTCACAAATCATGACACAGCTGTGCATTTT
TATGCCCCACCTACGATAGTAGGGGGGCATTATGTTTTCTGGTCTGTGCGTCCGTTCGTC
TGTTCGTCCGTTCGTCCGTCCGTCTGTCCCTCTTCAGGTTAAAGTTTTTGGTCAAGGTAG
TTTTTGATGAAGTTGAAGTCCAATCGACTTCAAACTTGGTACACATGTTCCCTATGATAT
GATCTTTTTAATTTTAATGCCAAATTAGAGTTTTTACCCCAATGTCACGGTCCACTGAAC
ATGGAAAATGATAGTGCGAGTGGGGCATTCGTGTACTGGGGACACATTCTTGTTTATACC
TGTTAAGAGTCGAAAACTAAATATTATTTTTATATAAATAAACATATATTGTGTCATTTT
AGAACTTATATTTTTCCAAAGGATGCATGAATGAAAGTAGTGAAATTCATTTTGCTTTGA
TATATAGATTTGAATTACAATTGTTCATGTTATTGTAATGCATATAAAAATAAGGAGATG
TGGCACAATGTAAATATATGATATTCTGTGAGTTTATCAAACTAAAGGGGATAAGAAATG
GGTATAAGCAGTTACAGGACTGTACTACTGTACAATCTCCAACAATGAGAAAAACTCATA
CTGTAAAGAGAATTTCATATTTACAAGTAAGTTTTGTTTTTGCATTGAATAATTTTCTTC
TATTGTCTTAAAAGCAAATATGGGAAGTGGTTAAAATGCTAATGAGACAGCTTTTATGGC
CACCAGATGTCATTGTTACCTTGATTAAAAACTCCTTTTTAGCTCACCTGACCTGACTCA
TCACTTGGTTTCGTCGTCCATAAACTTTTACAAAAA
>contig_51 Average coverage: 117,31
GGATATCCCTGTGTAGTGTGGCATTCCAACAATGACGTCACTAGGTTAGATATATTTAGA
ATATTTCGTAATACTGATTTTCCGGACTGTAAAAGAAACGTATATAGTGTAAGGGAAAGC
TCAATATACGATAATTTCACGAGAAACAGAAGGGAAATGTGTAAAAAATGTATTTAAAGT
CAATCTGTTCTCCTTGTCATCAATTTCAGTATGACATTTTGAGGGGGTTTCCAAACTATC
AAAACAAAATGATTGACGTGAGGGAATGATACTCTGGCCAACCCCATTAGGGAATTGACG
GCTTGAAGCCGTCTTTCCCCAAAAACTATGAAACCTATTTTTAACAATATTTATGTGTCA
CTTGTTTTAAATTTGCACATCAGTTATCTGTGTTGGTTTGGGTGTAGGCAATATGTTGGA
ACTTTTAGAGTCCTTTTAGTCAATTTTACCCAGAACTGGAGAAAGATTTTGATGACGGTA
AAGTAAAATCATAATATGGAACAACAATATAACCAGGTGCTCCGCAGGGCGCAGCTTTAT
ACGACCGCAGAGGTCGAACCCTGAACAGTTGGGGCAAGTATGGACAAAACATTCAAGCGT
GATACAGCTCTGAATTTGGATTGTGATCAAATTTTTGACATTACATGGGTTTTTTACACA
AAACAAATGTCAAGATTTTACAAATCAATTAAAGATTTCTTCTTCAAACTTATTTAAATC
TAAAATTAAATAGTTGACACAGCATAGGTTTCTGACACAGAATGAATGTGGTCTAATGAA
CTTAAAATTTTTTTTGCCTTTGAGCAATTCACTATGCTGTTGAATATTAATCCTGTCAAA
AAAATGTTTGAAGAAATTTT
>contig_52 Average coverage: 18,80
AAGCAAGCCGAGAAGCAAGCCGAGAAGCAAGCTTTTTCGAAATTGTCAAAAGGTGGATTA
GCATCATCACTTGCAAGGAATCTATTGTTAGATAAAAAATTTAGGGCTTAGGTTCCTACA
TTTTTCAAACATTTGGGTAAAATTTACACCATTATTGATAAAGACCAGATATAACCAGGT
GCTCCGCAGGGCGCAGCTTTATACGACCGCAGAGGTCGAACCCTGAACAGTTGGGGCAAG
TATGGACAAAACATTCAAGCGTGATACAGCTCTGAATTTGGATTGTGATCAAATTTTGTA
CATTATA
>contig_53 Average coverage: 17,38
CATTTGGTCTCTTGTTAAGTTGTTTCATGGGCAATCATACCTCATCTTCGATTTTATACA
TGGTGAATGCAATATTACCCCCACTTTTAAAGTATGGGTATTATTAGATAAGATACAGGC
AAACGAGGCATAAACCCAATAAAAATAGCCTATCAAAAAGTGATATTTTCTGTGATGTAT
AAAATAGAGAAGAAAGGATATGGGGTCTGCATCCATGAGGCAACATTAGTATGTGCACAG
CAAAAAAAACTTAACCAGGTGCTCCGCAGGGCGCAGCTTTATACGACCGCAGAGGTCGAA
CCCTGAACAGTTGGGGCAAGTATGGACAAAACATTCAAGCGTGATACAGCTCTGAATTTG
GATTGTGATCAAATTTTTGACATTACATGGTTTTTTTTTACACAAAACAAATGTCAAGAT
TTTACAAATCAATTAAAGATTTCTTCTTCAAACTTTTTAAATCTAAAATTAAATAGTTGA
CACAGCATAGGTTTCTGACACAGAATGAATGTGGTCTAATGAACTTAAAAGTTTTTTTGC
CTTTGAGCAATTCACTATGCTGTTGAATATTAATCCTCTCAAAAA
>contig_54 Average coverage: 2,90
TACACCAAATATACTAGACCTATTGCTTATAGTATCTGAGATATGGACTTGACCACAAAA
CCTAAACCTTGTTCACTGATCCATGAAATAAGGTCGAGGTCAAGTGAAAACTGTCTGACC
AGCATAAGGAAGTTGCATAGGTACGCACATACCAAATATAGTTATCCTATCACTCATAAT
AAGAGAGAAATTAACATTACAAAATCAAAGCACCAAAGGGTGCTATAGGCAGTTAATCAA
AAACTCAAAGGCAAACTTGGCAAAGTTCAGATGAATAGTGTAAAGAATTAGTCAACTATT
TATCTCAGGCATTGTTCTCAGCTATTTCTAAAGTATCAAATAATGCTTGTACAGTAATGT
TTATGTTATGCAATCCTACCACTTTCAAGAGTTATTTCCAATTTATATTTATAAAGATTC
AATGTCTGAGATTATACACATACACTGTCCTATGTTAGGGGAGAGTTTTGTGCCAGTTAA
GATGTTTAAGCCGCCACATTCTGTATGCACCTGTCCATAGTGAAGACCCATTAATGCAGT
GATTGTTGCTGTATATCACATTTATTTTTCATAATTGTTTTGTACATTTTTTTAAATTTT
ATTAATTTCTTGTGTATACTTCTGATTTTAGTATGATGTCCAAGTTATTGTAAATGCTCT
TTTGTTCCGACGTTGGAAAGTTCCAGGCGGAAAGAACTAACTAGCCGAAAAGTTCTCCAG
AACTTATTAACTACATTGTAGTTACTTTGTTCTTC
>contig_55 Average coverage: 251,62
ACTTTAACGCAAGTGCAGAAATGTCAGCAATTTGTACTCTGAGTGTTTCTCGTTCTGTCG
GTGGCGATTTTCTCTTTTAAAGCACATTAAATAAAATACATATTTTTATTCTAGAATATT
CTAGTAAATGTTAGCAGTACAGCATTGCATGTGACCCTATGCACATACTCCTAATTACGA
TTTCCGTGGAATTGTTGTTATATTTTTAAAGAAAATGCAGCTTAAATGCATTTTCCCATA
GGGTCAATGTTAAACTTTTGTCCAGTTTCCATAGCAATGGCAGCCATTTTGAAAATTTCA
AGTACTGTTGGTACCTCGGGGCACCACTGCCAACATTTACTCAAACTTTCAAGACTTTGC
CTCTTACAACGAAAGATTTAAAATTTGGATTTTTTTTTACATTTTTGTAGTTTCCATGGT
AACGGCGGCCATTTTTTACCATTCCAATGTCTCTTGCACAACTTCACATGGCGGTTCACA
TTATGGTATAGTTCCATCAACATGGGTCTGACCAATTACGAGAAATAGCGTGGACAAAAT
GTGTGGAAGAATAAAAATAATAATAAAAAGAAAAAAAAGAAACGTAGAATAACAATATGT
CACCCCAACTCCGTTGAGGGTGCCATAATAATAATAATAATAATAACTAGATTTGCGATT
GCAAGCAATAGCGGATGGCACCCTTCCCCTATTGCCAGGTGAGCGGTAGCCATGGTAACG
GCGGCCATTTTGGAAATTCCAAACTCAAAAGTCAAGTCTACATTAGCTGAGCAACATTTG
TTATAAGTTTCAATAAATTTGAAGCATTTTGAAGTTTTTCGTATTTTTGCTGTTTCCATG
GTAACGGCGGCCATTTTGAAAATTCCAAAGTCAACCTGCTGCTGCAATTTGTTCTCTCCA
TAATTATATACCATCATTTAACATAAAATGTCTCTAGAATAAATTTAACATTGATGTTCT
GGAATGTTCTATGTTAAACATTTCGCCTGTTTCCATGGCAATGGCAGCCATTTCGGAATT
TCTAAGTA
>contig_56 Average coverage: 210,93
TGTGTGCCTTGGCAGTCTTATCAGCTGGAGAAGCAGATTGCTGTGTGACTGGGTCAACAG
AGGATTCTTTACTCTCTAATGTTTCAACAGGGGTCTCTTCTTCTTCCTCCTCCTCAATGT
CTGCCTGGTTATACTCAGATGTAAGTACCTAGAAAATAGATTGGTTATACTCAGATGTAA
GTACATGTACCTAGAAAATAGGTTGGTTATACTCAAATGTAAGTACCTAGAAAATAGATT
GGTTATACTCAGATGTAAGTACCTAGAAAATAGATTGATTATACTGTACAAGCAGAAATT
TTAGTGGAGAATTTAATTTCTTTTAATATATCCACAAAATTAAAACCCCAACGAAATTTA
ACCTTCATATAATATCACTTCCATTTAAATTGCAGTCTGCATCAAAAACTTTTTCATCTA
CTAGATAGACTGGACACTAAATATAACCAGGTGCTCCGCAGGGCGCAGCTTTATACGACC
GCAGAGGTCGAAACCCTGAACAGTTGGGGCAAGTATGGACAAAACATTCAAGCCTGATAC
ATCTCTGAATTTGGATTGTGATCAAATTTTTGACATTACATGGTTTTTTTTACAAAAAAC
AAATGTCAAGATTTTACAAATCAATTAAAGATTTCTTCTTCAAACTTTTTAAATCTAAAA
TTAAATAGTTGACACAGCATAGGTTTCTGACACAGAATGAATGTGGTCTAATGAACTTAA
AAGTTTTTTTTGCCTTTGAGCAATTCACTATGCTGTTGAATATTAATCCTCTCAAAAA
>contig_57 Average coverage: 10,99
TTCGAGTAAAATCGTATCTGACAAAAACAACATTGAAAACAAAATGGCTGACGTGAGAAG
AAAATTACAATATCGGATCCGATTCCGGAAGCGGATAAGGGTAATCCGGGTTTTGGCGAT
AAAAAAATCAGACAGATGACAAAATACATCTTTGCATGGTAAATAAATATAAACACTAGA
ATTGAAAACCAAAAGATATAAGATAAAAAAAGACAAATTTTATTAAGGGGCGGTATTCAA
GGAGCTGTGGTATTTACACAGTCCTCCTCGTGTCTGAAGCAGACAAGAAAGCCACATAAT
TAACAATTTTTCGAAATAAATTTACATGCAGCAGTGAGAATAGACTTATCTTCTGTGTTC
ATAAGCCATATCAGTTTATCTCTTGCGTTAAGAGTTAACTAGGTGCTCCGCAGGGCGCAG
CTTTATACGACCGCAGAGGTCGAACCCTGAACAGTTGGGGCAAGTATGGACAAAACATTC
AAGCGTGATACAGCTCTGAATTTGGATTGTGATCAAATTTTTGACATTACATGGTTTTTT
TTTACACAAAACAAATGTCAAGATTTTACAAATCAATTAAAGATTTCTTCTTCAAACTTT
TTAAATCTAAAATTAAATAGTTGACACAGCATAGGTTTCTGACACAGAATGAATGTGGTC
TAATGAACTTAAAAGTTTTTTTGCCTTTGAGCAATTCACTATGCTGTTGAATATTAATCC
TCTCAAAAA
>contig_58 Average coverage: 35,74
GAAACTAATTGAATCAAATAAAATAGACACTTAAGTGTTTAAAAAGTGGTCAAAATCTTT
CGTCAGATGAACCTGAAATTTGAGGCCAAAATCAGTCCTTACCGGACCTACTCCTTTATG
AAAATTGTTAAATAATGACTAAAAAAGAAAATAACAAATAATGACTATAAAGGGCAATAA
CTCCTTAAGGGGTCAACTGACAATTTTGGTCATGTTGACTTATTTGTAGATCTTACTTTG
CTGAACATTATTGCTGTTTACAGTTTATCTCTATCTATAATAATATTCAAGATAATAACC
AAAAACTGCAAAATTTCCTTAAAATTACCAATTCAGGGGCAGCAACCCAACAACAGGTTG
TCTGATTCATCTGAAAATTTCAGGGCAGATAGATCTTGACCTGATAAACAATTTAACCCC
AGTCAGATTTGCTCTAAATGCTTTGGTTTCAGAGATATAAGCCAAAATCTACATTTTACC
CCTATGTTCTATTTTTAGCCATGGCGGCCATCTTGGTTGGTTGGCAGGGTCACGCCACAC
ATTTTTTAAACTAGATACCCCAATGATGATTGTGGCCAAGTTTG
>contig_59 Average coverage: 30,61
CCCCTTTGCTACAATGCATCTTTTGGTAAAAGTCAAATTAAATTAAAAATTTGCACCGCT
TCAAACATGAAATAAATGAAACTGCTTATAGACCATTATTAGTCTAATAAAATATGCTTC
TAGGACAATCCATCAGTGCTTTTTCTTTTGAGAGCCTTATTAACATGCCAATGGTAGGAT
TTGAATCTTGTATAAATGACTAAGGCTCATTTGAGGGGTGGTCGGAGGGGTCCTGATCCC
GAAATCCCGGGCTTAAAAACATGAAATCCCGAGGTGCGTATTTTAACGAAATTCATATCC
CGACATCCCGAAATTAAAAAAAATATTCCCGGATCCCGTAAGGATCAATCCCCAAATCCC
GAGCTTAAAAACACCCGATCCCGACGTCCCGAAAAAGTCCTGCCTCCCTCTAATCTCTAC
CCTACTTTCATTTTGGCCAAATCACTACTTTCACTTTCAACAATAAATTTTTATGCCCCA
TTTATGGGCATTATGTTTTCTAGTCTGTTCGTCCGTTCGTTCGTTCGTCCGTCCGTCTGT
CCCGCTTCAGGTTAACTTAAGTTTTTGTCGAGGGAGTCTACCCCATTTTCAAGGTCCACT
TAACATAGTAAATAATAGTGCCGATGTGGCATCCGTATACTATGAACACATTCTTGTTTC
CACATGTTTTACTTATTTCAATATATATA
>contig_60 Average coverage: 1,82
AAATCAAAGCACCAAAGGGTGCTATAGGCAGTTAAATCAAAAACCCAAAGGCAAACTTGG
CCAAGTTCAGATGAATAGTGTAAAGAATTAGTCAAAATATTTATCTCGGACATAGTTCTC
AACTATCTCGTAAGTATCAAATAATGCTTGTACAGTAATGTTTACGTTATGCAATCCTAC
CACTTTCAAAAGTTATTCCCAATTTATATTTATAAAGATTCAACGTCTGACATTATGCAC
ATGCACTGTCCTCTGTTAGGGATAGTTTTGTGCCAGTTAAGATGCTTAAACCGCAACATT
ATATGTGTACCCGTGACAGTGTCAATAGTGAGGACCCACTAATGTGGTGATTGTTGCTGT
ATATCATATTT
>contig_63 Average coverage: 92,64
CCGTTGAGGGTGCCATAATGATACGCGAAGCGAATTAAAGGTTTTTTCTTTCATGAATTC
AACGGAGAAGATACGTGTATTGGTTGATTGAAGGTTTGTGATCATGATTGATCAATCAAT
CAATTGATCGATCGTTTGATTGATTGATTGATCGAATGATTGACAGTTCGTAAAAATAGC
GATGGGACGTTTATTTCGGATTCTGCACTTGATTGATATCAACACTTGATTGATTGATCG
ATCTTTAATCATGATTTGATCAATGTGATCATG
>contig_64 Average coverage: 3,83
ATGTATATTTATGGTCTATTGAATAACTAAGAATCGCTTCTAGGGATTTATATCATTTTT
ACACTCAAAGTCAATTGTATACTTTTCTACTTACCAAAATAATAACTATTCATGATTCAA
GATTTTATTATTACTACAATGTTCACTTTTTAGATGATTTGAACGACAGGAAAATACAAA
AAAAATGCTTGTTTTTTTTCATATCATAGCTGAGGGGGTGGGGGTAGGAGGGGTCCTGAT
CCCGAAATCCCGGGCTTAAAAACACGAAATCCCGAGGTCCCGAATTTAAATAAATTTAAA
TCCCGAAATCCCGAAATTCAAAAAGGGTCAATCCCGTAATTCCGAGCTAAAAAAACACCC
GTCCCCGGAGTCCCGATAAGGTCCTTTCCCCCGTCTAGAATGATACGATATGAATCAGCA
GATTTTTCATCGATCATCAATTTTAAGTTCAACAACAAGTTATAATTACATTTTACTTAG
TTTAGTGAATAAAAATACATTTATCTTGTCACTATTCCATGAGTCGCTCAATGTTCATCA
TGAAAACAATCACATTGATTTCAAATAATCTTAAGAAAGCACTGTGAGCAGACATTTCAG
GAGACAATTAATGTTAGCTGACTGTTAATTATCTGAACTCATTTCTTGTCGACTTCATAA
TTATTTCAAA
>contig_65 Average coverage: 3,23
AGTGCATGGAATTATTAGTTTATATATAATGTGTTCCGTTATTCTCCCAAATTACAAATA
AATGATGTAAAAAAAGGAAATAATTAATGTTCTTAACTGCAAAATTTGTGTCAGCCTTTA
TGGTGATACATCTTTGATTCAATTCTCAAAGCCCACCCTCTTGATGCAGAACTAATGATA
TTCCATTTAAATGTATGTCATGTGTGTGGGAGGGTAAGAAGGGACTATCAAAATATCCCT
ACAACCAAGAACCATTTAATGCAGAAGTAAAGATAAGTTAAAAAATTATACCAAAATTGT
TGCTTTGAGGAATATCATTTTATAAAATTATAGTGTTTACTTAAATAATAATCCTATATT
TAATTTCAGTGGCATCCTGTTAGACCTATTATAGCATCCATATCCAGTGGTCTGGTATCT
ATATGGGCTCAGAATCAAGTGGTAAATATACATTGTAAACATTAGTGAGGAGAAAAGTAA
TGAGTTAATACAATATTGTTGGTGAAATATAATGTAATATAAAACTACAAAACAAATTAA
AACAAAAACACCAATATTTGTCAGAGTTTGTTAGCAAAATAACAAATAAAAAGAGGTTTG
TTTTAACAGAAATAAGCATTGTTCTGAGAAAGTGTCAGTTTCTTAATGGAAATGTACTCC
ATAAAGATGTTATATCTTTCGCAGAAGATATATTGGAAATCTTGAATGGAACATTACTGC
TGTAATGGAACAGTAGAGCTCTTTAACATTTGGTCGCTACGATCTTTCAATTGTAAACAA
ATCTTTATTGTGGACGAAAATAGTATGACTTCATTATCATACTAAGCCTACTTTAGTGTT
TAAAGACTTCTTGAAAAGATTGGATCCAGAATGAGATTTAAATGAAGTTTTACTTTGGTT
ATGTGAGGGGGGATAGGAGGGGTCCTGATCCCAAAATCCCCGGCTTCAAAACACAAAATC
CAGAGGTCCCGATTTTAAATAAATTTAAATTCCGACATCCTGAAATTCAAAAAAGAATTC
CCTTTATCCTGAAAGGGTCAACCCTGAAATCCTGAGCTTAAAAACACCCGATTCCGGAGT
CTCGATAAAGGTCCTATCTCCGCTCATAAAAGTTACAGTCCGCAGCTAATATATACATAC
ATGTATACAATATTGTGTGTAATGATAAAATTACTTGACTTAATTATTTCAAAGTTCAAT
TTCAGATAAAAATGTTATCTTTTGAATAATTAATGATCAATAGTTAAACCAAAGACATAC
>contig_66 Average coverage: 66,31
AATTTGGATTTTTTTTTACATTTTTGTAGTTTCCATGGTAACGGCGGCCATTGTTTACCA
TTCCAATGTCTCTTGCACAACTTCACATGGCGGTTCACATTATGGTATAGTTCCATCAAC
ATGGGTCTGACCAATTACGAGAAATAGCGTGGACAAAATGTGTGGAAGAATAAAAATAAT
AATAAAAAAAAAAAAAAGAAACGTAGAATAACAATATGTCACCCCAACTCCGTTGAGGGT
GCCATAATGATACGCGAAGCGAATTAAAGGTTTTTTCTTTCATGAATTCAACGGAAAAGA
TACGTGTATTGGTTGATTGAAGGTTTGTGATCATGATTGATCAATCAATCAATTGATCGA
TCGTTTGATTGATTGATTGATCGAATGATTGACAGTTCGTAAAAATAGCGATGGGACGTT
TATTTCGGATTCTGCACTTGATTGATATCAACACTTGATTGATTGAACAATCTCTTATCA
TGATTTGGTTAATGTGATCATGATTTGATCACTCTGATCATGATTTGATTGATTGATCAA
TACTTTGTAAAGCATAAAATGACACATTTTGCATTGGTTTATTCCTTGTCTATACGTTTT
GTGCTGTTCAGTGACAAATATCTGTGAACAATTTTACACGTAAAATTGAGAAAAATACTC
TATTTCCTGTTTTCTCATCAGAAAAAATGAATTGCGAATGAGTTATTCTAACACTAGATT
TGCCATTGCAAGCAATAGCGGAGGATGTCACCCCGTTCTTGACATTGTCACAGTAGCAGC
AACCAGTTTGAGTGTATCAAAGTCACATGGCACGTCTAGTATACATGCC
>contig_67 Average coverage: 21,21
TACATATCAAATATAGTTATCCTATTACTTATAATAAGAGAGAATTCAACATTACAAAAA
ATTTGAACTTTTTTTCTAAGTGGTCACTGAACCATGAAAATGAGGTCAAGGACATTGGAC
ATGTGACTGACGGAAACTTCGTAACATGAGGCATCTATATACAAAGTATGAAGCATCCAG
GTCTTCCACCTTCTAAAATATAAAGCTTTTAAGAAGTTAGCTAACACCGCCGCCGCCGCC
GCCGCCGCCGCCGCCGCCGCCGGATCACTATCCCTATGTCGAGCTTTCTGCAACAAAAGT
TGTAGGCTCGACAAAAATTGTAACCATGAAAAAGAGGTCAAAGGTCTGATGGTACCATGC
CTGACAGACATGTACACCTAACAATCACTCTATTCATTAAATATAGTTGACCTATTGCTT
TAAGTATTTTAAAAGAAACAAACTTCACCATGAAAACTTAACATTGACAAATGAACTTCC
AAAATGAGATCAAGGTCAG
>contig_68 Average coverage: 52,14
AATATTGTGCAATTAAAGATTTCTTCTTCAAACTTTTCAAAAATTTGGAATTTGAGAAAT
TTGGAAAAAAAAATTGAAAACTACTACCACCCCCTTTTTTTTGCAATTAGTCCAAAACCT
GACATTTCTTTATACATAATTTACAAGTAGTGTAAGGGAGGTAAATCCGAACATACCCAA
CATTGTATGTTAAATGTTTTTGAATTACCTCCCTTACACTGCTTTTAAATTGTCTTAATT
GTCCATTGACCAGAAAAACCTAGTTTCCCCTTTTTTTGCCCCTAATTCCAAAAATTTTGA
GCCATAACCCCCCAAAGTCAATACTAACCATCCCTTCATGGTATGGAAACTTGTGGTATA
ATTTCAGAGAGATTCATACACTTAAACACAAGTTATTGTTTGAAAACTACAAAAATGCTT
ATTTGGGCCCCTTTTTTGGCCCCTAATTCCTAAACCTTTGGGACCATAACCCCCAAAATC
AATCCAAACCTTCTACCTGTGGTATTAAACATTGTGGTACAATTTAAGAGCAATTTGAAG
TACTTATACACAAGTTGATATCCTGTACAAACAAGAGTGCACACACTGAAACGTCTCACC
TTCTTTACTAATCATTGATATTATGCTGATACTCCCTAAATATAAAGCTTTATTACAACT
GTCACATAAACTTAACATTGACCAATGAACCGTGAAAATGAGGTCAAGGTCAAATAAACT
TGCGAGACTGACATATAGATCATAAAATAGTTCCATACACCAAATATAGTTGACCTATTG
CATATAAGT
>contig_69 Average coverage: 14,19
TACGTATAAATCAGTTTGCTATGGTGGTAAATGTAACCCATTTCACATGAGCCTGGATTT
AAATCTTGTGTTTTTCTCTAATGCAATTTTTAAGATGACTTTATACAACACTAACCTCCG
ATACGTTCATACTTACCTTGTCTTACAAAAAATGCTAAAACTAGAAAACAACTAAAATGG
TGTAAGTAAAAATTAAAAAAATGACAGACTAGATATAGACACAGAAGAAAACAACACTCT
CTCTCTGCTCAGTTGAAATTTATTTTTTAACAGTGTCTACATTCGAATTGTACCCATTTT
TTGGGAATGACTGGTTTGACTTATTTGTAGGTCTTACTTTGCTGAACATTATTGCTGTTT
ACAGTTTATCTCTATCTATAATAGTATTCAAGATAATAACCAAAAACTGCAAAATTTCCT
TAAAATAACCATTTCAGGGGCAGCAACCCAACAACAGGTTGTCCGATTCGTCTGAAAATT
TCAAGGCAGATAGATCTTGACCTGATCAACAATTTTACCCCTGTCAGATTTGCTCTAAAT
GCTTTGGTTTTAGAGTTATAAGCCAAAAACTGCATTTTACCCCTATGTTCTATTTTTAGC
CATGGCGGCCATCTTGGTTGGTAGGCTGGGTCATCGGACAAATTTTTAAACAATAACCCA
AATGATGATTGTGGCCAAGTTTGGTTAATTTGGCCCAGTAGTTTCAGAGGAGAAGATTTT
TGTAAAAGTTAACGACGGACGACAGACGACGGACGACAAGTAAAGAGAAAAGCTCACCTG
ACCCTTTTGAGCCAGGTGAGCTAA
>contig_70 Average coverage: 22,39
ATCCCGAAATCGAAAAATATATTCCCGGATCCCGTAAGGATCAATCCCCAAATCCCGAGC
TTAAAAACACCCGATCCCGACGCCCCGAAAAGGTCCTGCCTCCCTCTAATCTCTACCTTA
CTTTCATTTTTGCCAAATCACTACTTTCACTTTCAACAATAAATTTTTATGCCCCATTTA
TGGGCATTATGTTTTCTAGTCTGTGCGTCCGTGCGTTCGTTCGTTCGTTCGTCCGTCCGT
CCATCTGTCCCGCTTCAGGTTAAAGTTTTGGTTGAGGTAGTTTTTGTCGAGCCTGCAACT
TTTGTTGCAGAAAGCTCGACATAGGGATAGTGATCTGGCGGCGGCTACGGCGGCGGCTAC
GGCGGCAGCGGCGTTAGCTAACTTCTTAAAAGCTTTATATTTTAGAAGATGGAAGACCTG
GATGCTTCATACTTTGTATATAGATGCCTCATGTTACGAAGTTTCTGTCAGTCACATGTC
CAATGTCCTTGACCTCATTTTCATGGTTTAGTGACCACTTGAAAAAAAAGTTAGATTTTT
GTAATGTTGAATTCTCTCTTATTATAAGTAATAGGATAACTATATTTGATATGTGCGTAC
CTTGCAAGGTCCTCATGTCTGTCAGACAGTTTCACTTGACCTCG
>contig_71 Average coverage: 148,13
GTTAGAAATATGTATGCGGTATAACGACTAACCATCAAAATTTTTGTAGAAAATATAAAA
TTGAGAATGGAAATGGGGAATGTGCCAAAGAGACAACAACCCGACCATAGAAAAAAACAA
AGCAGAAGGTCACCAACAGGTCTTCAATGTAGCGAGAAATTCCCGCACCCGGAGGCGTCC
TTCAACTGGCCCCTAAACAAATATATACTAGTTCAGTGATAATGAACGCCATACTAATTT
CCAAATTGTACACAAGAAACTAAAATTAAAATAATACAAGACTAACAAAGGCCAGAGGCT
CCTGACTTGGGACAGGCGCAAAAATGCGGCGGGGTTAAACATGTTTGTGAGATCTCAACC
CTCCCCTATACCTCTAGCCAATGTAGAAAAGTAAACGCATAACAATACGCACATTAAAAT
TCAGTTCAAGAGAAGTCCGAGTCTGATGTCAGAAGATGTAACC
>contig_72 Average coverage: 854,22
TAGTAAAATGACAAATATCTGAATATAAATAAAATTGAGAATGGAAATGGGGAATGTGTC
AAAGAGACAACAACCCGACCAAATAAAAAACAACAGCAGAGGGTCACCAACAGGTCTTCA
ATGTAGCGAGAAATTCCCGCACCCGGAGGCGTCCTTCAGCTGGCCCCTAAACAAATATAT
ACTAGTCCAGTGATAATGAACGCCATACTAATTTCCAAATTGTACACAAGAAACTAAAAT
TAAAATAATACAAGACTAACAAAGGCCAGAGGCTCCTGACTTGGGACAGGCGCAAAAATG
CGGCGGGGTTAAACATGTTTGTGAGATCTCAACCCTCCCCCTATACCTCTAGCCAATGTA
GAAAAGTAAACGCATAACAATACGCACATTAAAATTCAGTTCAAGAGAAGTCCGAGTCTG
ATGTCAGAAGATGTAACCAAAGAAAATAAACAAAATGACAATAATACATAAATAACAACA
GACTACTAGCAGTTAACTGACATGCCAGCTCCAGACTTCAATTAAACTGACTGAAAGATT
ATGATTTCATCATATGAACATCAGGCACAATCCTTCCCGTTAGGGGTTTAGTATCATACC
ATCATAACATATATGAGAAGAACATAACCCGTGTCATGCCAACAACTGGTTTTTGAATAA
ATGTGTTTAGTTCCGATGCAAAGACCCTATAAGTGAATCAATATTAACGCCAAAATATGC
AATCTTTAATGACCTGACAACAGTATCGTAACTATATCCCTTCTTAATAAGTCTATTTAA
AGGTTTTGTTAGTTTTTGAGGTGAATACTGACACTTTTGTGCTTTATAAAGAATATTTCC
ATAAAAAATTGGATGTGAAATACCTGAACGTATAAGAAGTCTGCATGTTGAGCTATATTT
ACGAATGATGTCCTTATACCGATGATAAAATTTAGTAAATGTTTTGACTAGTTTGTG
>contig_73 Average coverage: 1,96
TTTTAATGGTTGATATATGTATTTGTTTACAGTTACCCGTCATTGGATTTTTGATCCTAT
TACCACTGCTTTACCAGCTGTTATCCCTCATAGTCAGCCACAGACAGGGAACAAGTCCAC
ATCTGTCAGCTAGTAAGTTTTATGATATAATTTCCAAACATTTAAATTTTCAGTTAGCCA
ATCAGATCTATATATAACATTGTATAAAGGCTCCTGTTCTTATGATTGAATGGGAAAGTA
AATCAAAGATATTAAATGGGGGTCTCATTGG
>contig_74 Average coverage: 13,01
ATTTTAAGTTCATTAGACCACATTCATTCTGTGTCAGAAACCTATGCTGTGTCAACTATT
TAATCACAATCCAAATTTAGAGCTGAATCCAGCTTAAATGTTGTGTCCATACTTGCCCCA
ACTGTTCAGGGTTCAACCTCTGCGGTCGTATATAGCTGCGCCCTGCGGAGCATCTGGTTG
TGGATTGAGGAAAACTTGCATATTCACGGATATCTTAATTTGTGGTTTTGGCAAAATCTG
CATACATTACTTTAGAAAATTTGTATTTCATTCAACATTTTAATACGTGGTTCCCCTGTA
CCCACGATATTCCATAAAAATTAGTATCCAATGAATATAAATGTAATTCCACTAGTATCA
CATATAATTTAACATTTTCAAATATCCATTGAAAATGAGCTTATGGTCAGATGAACCATG
TCAGACAGAAGTATAGACCTTACAATTAATCCATACACCAAATATAGTGATCCTATTGCT
TATAGAACTGGATTAACAGGCACCCTGCCACATTCTGTATGTTTTTTGCCCCAAGTCAGG
ATCCACTTATTAGGTGGCTGTTGGTCTAATTTTTCTTATTGTTTTATCATATATCAAGTC
ACTTCAATTGTCTTACATTTGTCATGACGTCAAGGCATTTTATATATAGCTTATAGTATG
AGAAAAACAGACCAAAACACAAATACATCTGATCATCGTAACATTGACCAGTGAACTGT
>contig_75 Average coverage: 274,00
ATGGAATATAATAAAATATGTGTATAATATTATTGAAACATAGTTTATGATAACATTGGC
ATTGAAACGAACAAAAAATGTTTAAAAAAAAAATGATTTATATAACCACAATTTTAATAA
CAAAATGAAGTGTTTTTTGTACAAAAAAATGCATTTTACAACTTTTACTGTAGTCGAACT
TTACAATGTCAGACATTTCAAAATTAATCTTCAGATGACTGTTCACATCATGGTTGATCG
TTATACGCCAAAGAATTAGTACTTTGTGCGCAGCCTCCATTCAAACGGATAACCGCATCT
TAACGTCTTCTGATTCCTGCCATAAATCGACTAATTTGTTGCTAAGGTAGCAGCAACCAT
TTCTGATGAAGGGCATTGTTTATTTCATGACGTGTTTGAACTGGGGTGTCCTTTCGTGCA
CTTTACGCCCAATAGTGTCCCATATATGCTCGATATGGTTCAAATCCGGGCTACGATCGG
GCCAAGGAAGATAAACCGAATTCCATTTGAACAATGGATCTTCCTCCACGATGCTAATTT
CCAATTTTGGCGAGCTCTGCACTACATTGGATACGGATAACTGTGTGTCTGTTCGTAAGC
AAACGTCCCTGAAATGGTCTTATCGCACAATAACCAGTAGAGATGATTCAATCTCGAACA
ATTATTGTTAAAAGGCTCCTGTATGCCCACCCCTCTCTTTTTAGGATTGTATTGTATGCA
ATGGGTTTCTTTCTGACTAAGCTTCATCATGCTTGATTTTCCCTAGCAGGTGGCATAGGG
GGTCTTTTTGGTCTCGGATAGTCTTTTATATCGTGTATTGCCTGATTTTTATTCTCTAAA
CGACTAATAGTGGAAAAGTGATGACCGACAATACGTGCAGTTGTCACAGCGACATTCCTG
CCTCTCTCATGCTGATAATC
>contig_76 Average coverage: 108,30
GTACACTGAACCATGAAAATGAGGTCAAGGACATTGGACATGTGACTGACAGAAACTTCG
TAACATGAGGCATCTATATACAGAGTATGAAGCATCCAATTCTTCCACCTTCTAAAATAT
TAAGCTTTTCAGAAGTTAACTTACGCCGCCGCCGCCGCCGCCGCCGGATCACTATTCATA
TGTCGAGCTTTCTGCAACAAAAGTTACAGGCTCGACTAAAATGACAGGTTATATGAACTG
AGTGGCAATAAAAGCACAAGTCTAACACTTGCTTTTTAAAAAATTAAAATCTTTATTTAA
AATGGTCATCTTTAAACAAACAAAAATTGAATATGAAAATTTACAATTCCAACAATAGAT
CGATATTAAACAGAAATGTTTCATTATCATTTTTCGGCTACAATTGGTATATGAACCATC
CAAATGTCAAAATATCAACATAGAGTATTTACAAAGAATGTTTCTGTTATGTTGTGCAAC
TAAATCTCTACAGCAAATGGTAGTGACAACACTAGATGTTAATTAGGATCCAGCGAAAAG
CCAGGCTTTTGTCCACGAAGGTAGCAAATTGTCGGTGTGACTATCGCTGACGGCTTTTGG
TAACACACGATATGGTTGTTGGTCATGTTGTTATCACCAAGGGAAGGTCATCGTGCTCTT
AATTTCCACACAAACTGATATAGCTCCAAAGGTTTAACAATGAACACCAATGGACACTCA
TGTCAATTGGAAGGCCACGCGGAATCAATATCGGAGATGTTAAAGACAAATGCATCGGTC
ATGCTGGGCTTTTGTTGCTTAATGTCTAAATGGACATGGCCTATAATTAAAAGATCCTTT
TGCGGAATTTGTGGATTATTTGGTCAACTGTATACAGTCTACGAGCAATTGCATCCTGGG
AAAAGCCTCATTAGATAAACCCCAATTTGTTTGTAATTGGTTGTCAGAAAGACCTGGCAT
ATAGTCTTATATTTATTGAACTTACTTACTTACAATAAGGGATAAGCCAGCGAGTAAGTC
AGCAAAGGGTTAGGGAAGTACCTTGGTATATAAAAAAGTCGAAATAAACAATTGCCGGCT
GGCCAAGAGATTCTCCACGTGGGGTATGATGCCAGAGGTAGAAGTAGGCATTGCCTTAAA
AAAGGCACAGATCACT
>contig_77 Average coverage: 200,93
GTACTTTGTGCGCAGCCTCCATTCAAACGGATAACCGCATCTTAACGTCTTCTGATTCCT
GCCAAAAATCGACTAATTTGTTGCTAAGGTAGCAGCAACCATTTCTGATGAAGGGCATTG
TTTATTTCATGATGTGTTTGAACTGGGGTGTCCTTTCGCGCACTTTCCGCCCAATAGTGT
CCCATATATGCTCGATATGGTTCAAATCCGGGCTACGATCCGTCCAAGGAAGATGAACCG
AATTCCATTGGAACAATGGATCTTCCTCCACGATGCTAATTTTCAACTTTAGCGAGCTCT
GCACTACATTGGATACGGAAAACTGTGTGTCTGTTCGTAAGCAAAGGTCTCCGAAATGGT
CTTATCGCACGATAACCAGTAGCGATGAGTCGATCTCGAACAGTTCTTGTTAAAAGGCTC
CTGTATGCCCACCACTCTCTTTTTAGGATTGTATTGTATGCAATGGGTTTCCTTCTGACC
AACCTTCATTATGCTTGATTTTCCCTAGCAAATGGTATAGGGGGTCTTCTTTATCTCGGA
AGGTCTTTAACATCGTTTAGTGCCTTTTTTTAATTCTCAAAACGA
>contig_78 Average coverage: 54,06
TACTAGCCCTATTGCTTGTAGTATCTGAGATATGGACTTGACCACCAAAACTTAACCTTG
TTCACTGATCCATGAAATGAGGTCGAGGTCAAGTGAAAACTGTCTGACAGACATGAGGAC
CTTTCAAGGTACGCACATATCAAATATAGTTATCCTATTACTTATAATAAGAGAGAATTC
AACATTACAAAAAATCTTAACTTTTTTTTCAAGTGGTCACTGAACCATGAAAATGAGGTC
AAGGACATTGGACATGTGACTGACGGAAACTTCGTAACATGAGGCATCTATATACAAAGT
ATGAAGCATCCAGGTCTTCCACCTTCTAAAATATAAAGCTTTTAAGAAGTTAGCTAACGC
CGCCGCCGCCGGATCACTATCCCTATGTCAAGCTTTCTGCAACAAAAGTTGCAGGCTCGA
CAAAAACCATTAAATATCAGAAAAAAAACATTATTATAAATGATCATGAAAATGAGGCCA
AAGTCAGATAAATCAATCGGAGCCAGCCTAAAGTACACTGGCGGAAACAGAAATATTCTT
AAAGGAGGGTTGTCACGGACTGCCAAAGAGAGGCCGGCTCAAGCTATTCAATATACATGT
ATAACCAACCAATGAGCCCTCACCCTAAATCCGACTCTGTTATAATCATCCCATCAACCA
AATATTTTTAAACATATTTAGTATTCAAGAAAAAGATAGAACCATGAAAATGAGGTTAAG
TTCAGATAAACCCTACAAGACAGGCATATTTGTTTTTCATTCATTATTTTGTACATAAAT
CATGGCATTAGTTTTCTCACTTGAAATGTTTTAAATTGTTCATTTGTCATTTCAAGGCCT
TTTATATCCAACTATGCAGAATAGGTTTTAATC
>contig_79 Average coverage: 1,78
TTCAGTTTGAATGAGTGTAATATACCTGCTGTTAAACTGTCTTGCTTTTAAAATCATTTG
ATTAATATGTGAACCTGTATAAAAGTCTAGATATTTATGTAACCATGCACATAGCCTCTG
TCAGTAAAACGTTCTCAATCAGAACCAAAGGCTTTTGTGCTATCATTAAAAAGAATTGGG
TTTTAGTAGAGTATTATATACAGCAGTGTTAGTTTGATAAAGAATTTGATTTGTAATGAT
GTAACAGTATTACGAAATACTTGAAAATATCCATGTATGAACTATGAAAGGAAATTTGAG
ATATACTCCAATAAGGCAACAATCAATAAAGTTTTGATTAATAAAATTAGAGAATGGAAA
TGGGGAAGGTGTCAAAGAGACAACAACCCCACCATAGAGCAGACAACAACAGAAGGTCAC
CAACAGATCTTCAATGCAACGAGAAATTCTCGCACCCGGAGGATTAAATAGTTGACACAG
ACCGCAGAGGTCGAACCCTAAACAGTTACTGCTCTGAATTTGGATTGTGATCAAATTATT
GACGCAATATGAGTTTCTGACACGAAACAAATGTCAAGATCTTACAAATCTACTATGCAA
TATTGTGCAATTAAAGA
>contig_80 Average coverage: 19,42
ATCTCTCATCGCTCCCATTTTCTGATATGTCGCGTGGGACATATCAGAAAACGGGAGCGA
TGAGAGATCGGTTCTTAATTAGATTGGACAGTAATGTTCCATGTTGGAAACTAACCCGTA
GATAGTGTAAATAGAGAAGAAAATGTAGCACATCTTTTTGTAAAATCAAATGACAACCAG
GTGCTCCGCAGGGCGCAGCTTTATACGACCGCAGAGGTCGAACCCTGAACAGTTGGGGCA
AGTATGGACAAAACATTCAAGCATGATACAGCTCTGAATTTGGATTGTGATCAAATTTTT
GACATTACATGGTTTTTTTTTACACAAAACAAATGCCAAGATTTTACAAATCAATTAAAG
ATTTCTTCTTCAAACTTTTTAAATCTAAAATTAAATAGTTGACACAGCATAGGTTTCTGA
CACAGAATGAATGTGGTCTAATGAACTTAAAAGTTTTTTTTTGCCTTTTGAGCAAATCAC
TATGCTGTTGAATATTAATA
>contig_81 Average coverage: 7,83
CTTATTTAACATTTTCATTGTAGTCATGTTCATTTATTCTATTTTCTTTCAGAATTACTA
AAATGAACATTTTTTGTAACCACTCATGAGTCAGTAGCATTGTCAGTAGTTGTCTCCATA
TGTTAACCAGGTGCTCCGCAGGGCGCAGCTTTATACGACCGCAGAGGTCGAACCCTGAAC
AGTTGGGGCAAGTATGGACAAAACATTCAAGCATGATACAGCTCTGAATTTGGATTGTGA
TCAAATTTTTGACATAACATGGGTTTCTGACACAAAACAAATGTCAAGATTTTACAAA
>contig_82 Average coverage: 1,76
ATGAAGCATCCAGGTCTTCCACCTTCTAAAATATAAACCTTTTAAGAAGCTAGCTAACGC
CGACGACTGCCGTAGCCGCCGCCGCCAGATCACTATCCCTATGTTGAGCTTTCTGCAACA
AAATTTGCAGGCTCGACAAAAAACTATCAAATCCCTGAGTTTTGTTCCAATTTCAAACCA
ATGCATGTAATATTGGATAGTATATTTTGTAATTAAAATCATGCTTTTATGTCATTTGGT
CT
>contig_83 Average coverage: 14,09
ACCCCTTGTTGGTCTATGTACTTGGTATGAAGTACTATGCTATAATGTGTTATACTACCG
TCTAGTGGGACATCGCCGACAAAATAAAATGTAAACATAGAGACATTGTTTGAGGTCTTC
AATGAAAATTAGACTAGTTCTAATCAGTTAACTCTTTAATAGCTTGTCGAGAACAAAAAC
ATAAAGCAGAATAAACTACTGGAATATTGAGACCACACATGAATACAAAATAAGCATGGG
TACTCTTCGTTCCGACACAGGAGACTAGATAAAATATGCAAAATACACCTCGTTCTGGCA
AACTCAGATCAGACAGACAACTTGAAGCATCATTATACCTTTAACCAAAAACAACAATAC
ATATATTTAATAAGCACATCAAATTGGGTTTTACAGCTTTATTTGTGTACAACGAAGAAC
TCTATAAAAGTAATACAAAATAGTTCGAATTAAGCGTCTTGCTTGGAGTTCTCCACGACA
CGGACTGTAACGACGGTGCAGATCATTACTAGTTTTCAGATCTATATTTAACTTCAGATC
TCGAGATAAAGTTTTAACAATGATACAAAAGTATGCTATCTGCACCAGTATATAACATAA
CAATAATTGCAGTTTTGAACATGATAGTTTGTAGTTTAAAAGCATTTTCTG
>contig_84 Average coverage: 9,67
TGTGGACAATGGATGGACCGGACTCATCGTACTCCTGTTTGCTGATCCACATCTGTTGGA
AGGTTGAGAGTGAAGCCAAGATGGAACCACCGATCCAGACGGAGTATTTCCTTTCTGGTG
GGGCAATGATTTTGATCTTCATTGTGCTTGGAGCAAGTGCTGTGATTTCTTTCTGCATTC
TGTCGGCAATACCTGGGAACATGGTGGTTCCACCAGACAAGACGGTGTTGGCGTACAAGT
CTTTACGAATGTCGACGTCGCACTTCATGATACTGT
>contig_85 Average coverage: 7,00
AAATGAGTCCTTACCGGACTCCTTTCACAACGATCTGCTTGGGATAACTTAAGAAAACAT
GAAATGAAATCGAAATTTTAAGTTTGAACGACTCTCTAAAATAATAAAATATAAGAGATC
ATTTAAATTGAAAGGATCATGAAAACAACTGTTTAGTACTTTTGCGAAACTTCATCAAAA
GGAAGGACAGGCATTGGTATATTATAATATGAACTCGTAAGTTAAAAACCCATTAGAGAA
AATTTCACAAAAATATATTATTCATATAGTTTTATTTCATATTTATTTCAACAAAAACAG
TATGAAAAAAATTGCACAATCCCTGTAGACATACAAATATCACAGATCTAGGAGGCAACG
TACCCCGAGTTCTTAACATCTTAGAAACATTTCCTGTGGACGATGGATGGACCGGACTCG
TCATACTCTTGTTTACTGATCCACATCTGTTGGA
>contig_86 Average coverage: 45,99
ACCAGAGTTTAAATGAAGAGGATGTCAGCAATCATAGGCAGTCGTACGGCCTTTAACAAA
TCGTATAGTCGGCTATAAAAGACCACCACGTGGAAATGTGAAACAATTCAAACGAAAAAT
GTATCGGCCTTATTTATAACAAAACAATTTACAAAAAACAAATATGAAACACATGAACCA
ACGGCAACCATTGAACTACAGGCTCTTGACTTGTGACAGGCATATGAAGAATGTGGCGGA
GTTAAACATGTCTGTGAGCGCTCAACCCTAACCCAAACCTGGGACCGCCGTGTCACAGCA
CAACAAAAACCATAAAAAATAAGCTGTAGCTGGATAACTCAATAGATCGGTATTACTGGC
CAATATAAATTCATCAAAATCCGGCGAAGATCTCGAAGAGTGAGCTGATCCTGCTCAAAG
TGAGTCACCTGTCGTGTTATTCGTGAAATTACAAACCCAGTGATTT
>contig_87 Average coverage: 13,09
GACTACAGGCTCTTAATTTGTGACAGGCATATAAAGAATGTGGCGGAGTTAAACATGTCT
GTGAGCGCTCAACCCTAAACCAAACCTGGGACCGCCGTGTCACAGCACAACAAAATCCAT
AAAACATCAGTTGTAGCTAGATAACTCAATATATCGGTATTACTGGCCAATATAAATTCA
TCAAAATCCGGCGAAGATCTCGAAAAGTGAGCTGATCCTGCTCAACGTGAGTCACCTGTC
GTCATGTTATTCGTGAAATTACAAACCCAGTGATTTTGTCGAATATGGTAGGTCATCCTC
GAGGAAAAGCGGAAGGAATTATGGTTTCGACAATTGGAGCATATATTATCCGTTGTTTCC
CTGTAATTGAGTGTGAGATGATT
>contig_88 Average coverage: 5,05
GCACCACTTTTGGGCTATTATGAGGCGGCCAGTTTTTACTGGTGGAAGAAACCAGAATAC
CTAGAGAAAACAACCGACCTTCAATAGGAAAACTGACAATCCTAGTCAATTAAGATTGGA
GTAGAGTGCACCCACAGAGCAGGGTTTGAACTCACAACCTCAGTGTTGACTGGCTTGTGA
TTACAGTAGTAACTACTTAGACCACTGGACAACCGCGCCCCTTACATCAACTATAAGAGG
AAAACAACGAAATACTAAAGCAACAACAACAAAAAAGAAAATGTAACACACACACAAACG
AACTATAAGAAACAACTGCCATTTTCCTGACTTGGTACAGGACATTTTAAGAAAAAATGT
TAAAAAAAAGAAACATTATAATTTATCTTACCTCCTATACATTTCTAGGAATATGATTGG
TTAAAAGCGTCCTCGTGGAAACCGTGTATATTTAATATTAGGTTAGTAGGGAGGCGGGGC
TTATTTCATACACGGTTAGTAGTGGTGTTACGTCCCTTTATACTGAAAACAAAACGGTAC
TGAGAAAAAATCGTAAAGGTTTCAACAGACGAAGAAATTGATGATCAAGATAGTCGTGGG
AC
>contig_89 Average coverage: 4,39
GGCACCACGACTATAGCTGAAAGGAATCTGTGACCTACACATCCACACACAGATATGGAA
AATACAGATGAGGCTCCTGTTTGCATCAAAAGGGGGGTCTCATTGGGGGGTTCCGGATCC
CGGATCCCACTTACTGTTTTGTCAGATTTCTGTATTCCGCTTACACTATGTACATAAGCA
ATTCTCATTTTTTAGTCATTTCCCGGGTCCAGCAAGACCTCATTTCCCGTTTTCACACCA
CAATAATTTGACTTTCACGTGTCACGCTTACAAAAAATCGGCAATCCCGTGTCACGCTTA
GACCCCAATGAGACCCACATTTAATATCAATGAAATCCAAGTCCAATTGATAGTATGTTA
CATGCTTTAAACATCTTTTCCTCAGCACATTCATATTTTTATAAGTCATATACCATGAAT
TCATTCTTATTCATAGTGTACTAATTTTTGTGGATAAATGTAAAATAAATTTTCGGTGTA
TTCCTTGGTTTTGGCAAAGGCTTCAGACTTGAGGTGGCTCGTGGGTACAAAAATTGCAGC
AAAAAATTGAACCTTTAGCTTTTCATTACAAATTTTATTTATTAAAATTGAGAATGGAAA
TGGGGAATGTGTCAAAGAGACAACAACCCGACCAAATAAAAACAACAGCAGAGGGTCACC
AACAGGTCTTCAATGTAGCGAGAAATTCCCGCACCCGGAGGCGTCCTTCAGCTGGCCCCT
AAACAATATATACTAGTCCAGTGATAATGAACGCC
>contig_90 Average coverage: 2,00
CACATTACAAAATCATTGAGAAAATAGTTTGCTCATTGGAATATCGTTTGATTTATAAAT
CTTTTTTTTTTGGTTCATACATCATAAGTCATTAAACAAAGACATGTGTATAGACTATCG
CTAAATAACGAACAGTCAATGCGATTGAAGATGAGAATTTCGTTGAATGGATACTTGAAA
AAGAAGTTAAGATGTTTTGTTATTGTTAATTTCTCCCTTATAAGTAAAAATTTAACGATA
ACTATATTTGGTATTTGCGTA
>contig_91 Average coverage: 28,03
ATGGTTACGACAATTGGAACATATATTATCCGTTGTTTCCCTGTAATTGAGTGTGAGATG
ATTAAAAGTGTTCCATTTGTTGACAATAAAGTACTAGTCATTTGATTTGTGTCGAGCCTG
CGACATTAATGTCCGCGGAAGTGAGACAAAGCAAATCTTTATTCAGTCGTCGGTATTAAT
GGCGTCGGCGTCTTCGTCTTTTAGATTGTTATGTTTCTCATTTTTTTGTTCACATTTATC
ATTTCGGGATCTTCATAGCTTACTATGCGGTAGGGGTTTTGCTCATTGTTAAAG
>contig_92 Average coverage: 48,20
CAAAGTTTCATTAAGTTTGAAGCATTTTGAAATTTTGGATAATTTTGCTGTTTCCATGGT
AACGGCAGCCATTTTGAAAATTCCAAAATCATAGAGTGCATCTACACATGCCAATTGTCA
ATTTTGTAAAGTTTCATTAAGTTTGGAGAACTTTGAAATTTTTGAAATTTTTGCTGTTTC
CATGGTTACGGCGGCCATTTTGAAAATTCCAACTCCAAAATGCAACTCTGCTCATGCTAG
TTACTATTCCTGTAAAGTTTCATCCAGTTTGCAGCATTTACATTTTTTTTGGAAATTTTT
GACCTTGTCTGTTAACATTGTTGT
>contig_93 Average coverage: 196,27
GCAACTGGAAAGTCAGGGTTCCTTGTTATAGTGCACCATCATTCAGATTGGTTCCTTTGG
CTCCGAGAAAACTGCCGGACAAAATTAGGTGGAAGAAAAAATAATAATAATAATAGGGAA
AAAGAAACAGAGGAAAAGCAATATGTCACCCGACATTGTCGATCGGGTGACATAATAATA
ATAAGAAAAAAAAGAAACGTAGAATAACAATACGTCACCCCAACTCCGTTGAGGGTGCCA
TAACTAGATTTGTAATTGCTAGCAATAACGGATGGCACCCTTCCCCCATTGCCAGGTGAG
CGGCAGCCATTTTGAAAATTCCAAAGTCAAAGAGCGCATCTACACATGTTTATTAACATT
GTTGTAAAATTTCATCTAGTTTGGAGCATTTTGAAATTTTTGAAATTTTTGCTGTTTCCA
TGGTAACGGTTACCATTTCCAAAATTCCAAAGACAGGTGCCACATTGGTACATGCCATGT
TACATATCTATAAAGTTTCATTGGGATTGATGCTATATTCTTCAAGAAAATGCATCTTTA
ATGTATTTTCCCATAGGGCCAATGTTAAACTTTCGCCCTGTTTCCATGACAATGGCGGCC
ATTTTGGAATTTTCTTATATTGTCACAACATCTAGGCATACCAAGGAACATTACCACTAA
GTTTCATCCAGGTAGGTCTTATAATGAAAGATTTAAAATTTGCATTTTTTTTCACATTTG
ATCAGTTTCCATGGCAACGGCGGCCATTTTTTACCATTCCAATGTCTCTTGCACAACTTA
ACATGGCGGTTCATATTATGGTATAGTTCCATCAACATTGGTCTGACCAATTCTGAGAAA
TAGTATGGACAAAATGTGTGGAAGAATAAAAATAATAATAATAAAAAGAAAAAAAGAAAC
GAACAATAACAAGATGTCACCCCAACTCCGTTGAGGGTGCCATAACTAGATTTGCCATTG
CAAGCAAT
>contig_94 Average coverage: 19,49
TTTTTCTAATGATGATGATGATGCAGCTGTGGACATTTCTTGTTCAAAGTCTAATGCTAC
ATAGCACAATTTTTCTTTAATGTCTCTTACGATTTCTCTCTCGGCTGTGGTTGTGAATGA
ATATCCACGCTCTGTGAGAATTTTCATAAGATAGTCTGTCAGATCCCGACCGGCAAGATC
CAATCTCATAATAGCATGAGGAAGTGCATAACCTTCATAAATGGGTACGGTATGGGTAAC
ACCATCACCAGAGTCCAACACAATACCAGTAGTACGACCAGAAGCGTATAAAGATAATAC
AGCCTGGATAGCAACGTACATAGCTGGAGAGTTGAAGGTTTCGAACATAATCTGTGTCAT
CTTTTCTCTGTTGGCTTTAGGGTTGAGTGGGGCTTCTGTTAGTAAAACGGGATGTTCTTC
TGGTGCTACACGGAGTTCATTGTAGAAAGTGTGATGCCAGATTTTCTCCATATCGTCCCA
GTTTGTGACAATTCCGTGTTCAATTGGGTATTTCAATGTAAGGATTCCTCTTTTACTCTG
GGCTTCATCACCAACGTAGCTGTCTTTTTGTCCCATACCGACCATTACACCCTGAAAATC
ACAAATGAATGAACATGTACTTTTTGTTACATAAGACAACATGTAGATTTATGTACAACA
CTAAATTGAGGATTTATAAAAACAAAATAATAATGTAATTGTTGAAAATATAGACATATC
TTCGCATGTTTATTTCTGCTTTAAAAAAACTCGTTGGGGCGTAGTAAAAATTCAGTCATT
AAAAAAAAGGAAAAAAAAAGGTATAAAATCAAGGGTATTTTTTGAAAACTGTGACAAAGT
TCAATCCGGGACATAATTTGTCGATCCAGGATCACAGTAATCGCTTAATTTTTATTTCAA
ATATCCGATAGAACATTGTTTAATTATTCAAAAGTATGAATATTCAAATCCGTTGTCGTT
AGCAACATGTGATTACTGCCATTGTCTCAAGTGGTCACCATATAAGGCGTTGTTCCACAT
TGTAAGCTACGATAAAGCATTTAAAGATCACACCAATGGCATTTCTGATCATAGACAAAA
AGTTTTAAATAAAAATGGAAATGTTAGAAAGTCAACGTAGACACATTGCATTTCACGTGG
ATAAATCATCTCTCAATTTCTTTCATTAAAGTACACACGGGGGCGTGGCTAACTGCCGAT
CATGACTCATCTCCAAATATGGGCACCGGCAACGTGTACCGGCATATTTCATCATATTCA
AACAATATGATTATGTTTCGATTCAATCTGCGATTCACGAGATTTATTACACGAAAAATG
AAGCATTTAAATGAGTTTATAATAAAACACGATTGCTACCATAATTTGGCGTATTTTATT
TTAGCTGCACGATGTGGGATATCAAATCAGATCAAATAACATCAAATAAAATATACTTAT
CCCAAATCAAAGGTAATTGACGTAAATCTTAGATTAAAAAATTCTCAAATAAATCAATAG
TATCACTGTTAACCATGTTTGAAAATTTAAACAATATGCAAAGATTTAAAAAAATAAAAT
TTAAATTTACAAACCTGATGTCTGGGTCTGCCAACAATTGATGGAAATACAGCTCTTGGA
GCATCATCTCCTGCAAATCCAGCTTTACACATTCCAGATCCATTGTCTACAACTAAAGCG
GCTACGTCGTCGTCACACATTTTCCTTTCTCTTGTTTTTCTGACACGTCTTAAAACCTTT
AGTTATTGGGTTAATAAGATAGGTGAGAAATTTCAGTCGTATTTATGCAGTAAAAAGCGA
AGGGGCGGAGTTTTCCAAGAAATAGACTCATATCGTAAGAAATCAATACCAAATTTGGGA
ATACCTTGTTCCCTTATATGGATTGGCCAATAATATCTATCATGTGGTAGGTATAGGTGT
TGACATACTTTACATACTATACAGGTATATCTAATTATGGGTTTATGAAATAATCTAGTA
AACAAACACCTTTAGTTCAAATTCGTTCTGTACAGAATGATTAATAGACCATACGTAAAG
GAAATGTATGTTTAAACGTACATAAATGTTGTCTGTTTCTTTTCTAGAAATGTGAACAAC
ATAGGGTTTGCCCTGAAAAAGTTGCTAGTGAAGGCACAGGAAGATGGCAGAATTGTTGTT
GGAGTTTATGAATGCGCACAGATCTTACAAAAGTAAGTGTACATATCATTAGTCACTGTA
TATGAATAGTAAAGACAGATGAAGAGTTGGCTATTAAAGATGCTAGCAGTAAAATGGGAT
TCAGTAAAAAGTAACGAAAGCTAAATCAAGAGTTGGCAAATATTCTAGCAATAAAAAAAG
ATATAGCATTTCAATTTATTGCTTTTACAGAAATTTGATATCCGGTTCTGTATGCATTGT
TTTATACTTATGATTTTCTCTTGTTTTTGCAGTTCTCCAGAAACAGTTCGACTGTGTTTG
CTACCAGAGATGGCCGAAACAGACGTAACAGTGCAAATTCATCATAAACTTGTTGAAGCT
TTCTGCTGGGAAAATGACATCGAAGTCGTTAAGGTAAGATTACATAAGAGCTTTTGTTGT
CATTTTAGTGAAACAGGATATTCCATTAAGTATATGTAGTAAATCATTTTTTTGGAAAGT
TGTTGTTTTATTTCCTAGTAATAAACAAGGGGATTCCCTGAAAATATATCGTGATTAGTT
TTGAGAAACAAGGATGTTAAATATCAAGTCACTGCTTGAATGAAAATTCTGAGAAAATCA
ATATTGGAACCTACGCACATTAAAATAGATAAACATGTTTATAACTTGTTTTTTTTTATA
TCATTACGTAACAATTTGTTGTTGTTTTTCAGGTTGACAGCTTAAAAAAGATGGAAAAGG
TGTTAATCGGCGAGGAGGTTGAAGGGAATGGTATTGACTGTGTACTGATACAGAACGCTA
AGACAGACAGCAGTGCTGATGACTTCATAAATAACTACTATTCCATGTTATCCAACCAAT
GTCCTGTTATTGACCTACCCGAATGAAGAACATCCAGGGTTTTCATTGAATTTTCCAGGT
AATTAAAACAAATTTGTTTGAAAGCAATCATACTATTTGTGACTTGTGTGCAAACCATGA
GAAATTAAAGAAAAAAAAAGATTTTTTCAAGAGACGACACTATCCAGACTTTTGGAGATA
AACATTCTTGTTTTACTATGCATGTATAATGCTATTGAAAGTGTGAAATGTATTTGTAAA
TATATGTACTCTGGTTTGACAATCTTCTTTATTATTTGTTTAGGAAGCCAAAACCTGGTC
AATAAAATCAATCTACATAGACAGAAATAGTCTGCTTTAAGAGGACGTCAGATGACAACT
CTGGAGAACCCATAGACAGAACATTGGACTAGCACCTCAAAACAACTGTTGCATACCGTT
TGCAACATGTAGTACGTAAAACTACAATGATCCAGTGCTGCACCAAGAATGTTTCTACCA
TAGCCGCTAAACCATGCTCATCATTGATACTCAACTGTTGTGTACTGTTAGCAACATATT
ACATCAGTCATTGCGTGACAGAAGACGTGAATATATCAGATCTTCGAGGCACACGTGATT
AGACTTAAGTTCATATTCGTGATATATACATTTTATTGCATATATCAATATATGATCCCG
AACTTAAGAGCATATATCCATTGTGCTCTTACAGTAATTGTTAACATTAGACATCGTTTG
CTGTGTGTATTATTATTTAGTACATGTAAATTAACAACTTCAAACAGACATGACTCATAT
TGTGAAGTATATGAATGTTTATAAATATATGTTGTACAAAATTTCACTGTTTTCATTAAT
TATGAATTAGAATGTGTTTATGAATAAATAATATACGAAAATATTTTACCATTTTTATTT
AAGATAAAACATAAATATATGCTCTGCCTTCAAGTACCATTTCTAACGAAACAAACGCTA
CAAACGCCACAAACAAACAAAAATGAATACAACAAAGGATTCCACAAAAACATAAAAGTC
AAGAGAGAGAGAAGAAGTTTTTTTTGTTTACAAATAAACGAACAAACATGAAGTTACAAG
TTTTATTCACGATTCAGTTTTGAATTGACAGAAAAATTATTGCTGAGTTTGTTGTTTAAT
CGAGAGTACATTAGCAAAGTTGTATTGTTACTGCACAATTAACAGGACAATCGGAAAGAA
AACAGGAAATCTATTGT
>contig_95 Average coverage: 43,33
AAAGAATATCCACGTTCTGTTAGAATTTTCATCAAATAGTCTGTGAGATCCCGTCCGGCA
AGATCCAACCTCATAATAGCATGAGGAAGGGCATAACCTTCATAGATGGGTACTGTATGG
GATACACCATCACCAGAGTCCAACACAATACCAGTTGTACGACCAGAAGCGTATAAAGAC
AAAACGGCCTGAATAGCAACGTACATAGCTGGGGAGTTGAAGGTTTCGAACATAATTTGG
GTCATCTTTTCTCTGTTGGCTTTGGGGTTGAGGGGAGCCTCCGTCAGTAAAACGGGATGT
TCTTCTGGTGCAACACGGAGTTCATTATAGAAAGTGTGATGCCAGATCTTCTCCATATCG
TCCCAGTTTGTTACAATTCCGTGTTCAATAGGATATTTCAGTGTGAGAATTCCTCTTTTG
CTCTGGGCTTCATCACCAACGTAGCTGTCTTTCTGTCCCATACCAACCATTACACCCTAA
AGCAAAAAACGTGTATAATAATATTAATTGAATTGGT
>contig_96 Average coverage: 11,74
TATTTTCTTTCTGGTGGAGCTACTACTTTAACTCTCATAGTTTGTGGCGCCAATAAAATT
GATTTCCTTTTTCAACCGATCAGAAATCCCTGGAAACATGGATGATCCCCCGGAGAGAAC
GACATTTGCATAAAGGTCTTTCCGGATGTCGACATCACATTTCATAATGCTGTTGTATGT
TGTGTTATGGATACCTGCGCTTTCCATTCCAAGAAAAGAAGGTTGGAACAAAACTTCAGG
ACACCGGAACCGCTCATTACCGACTGTAACTATTTGTCCATCCGGAAGTTCATAGCATTT
TTCCAAAGAGGAAGTAGTCGCCGCTGTTTGCATTTCCTGTTCAAAATCATAGGTAACAAA
GCAAAGTTTTTCTTTAATGTCTCGTACGATTTCTCTTTCGGCAGTAGTTGTGAATGAATA
TCCACGTTCTGTGAGAATTTTCATAAGATAGTCTGTGAGATCACGTCCAGCTAGATCCAA
TCTCATGATAGCGTGAGGAAGGGCATAACCTTCATAGATGGGTACGGTATGGGTGACACC
ATCCCCAGAGTCCAACACAATACCAGTTGTACGACCAGAAGCATATAAAGATAATACGGC
CTGGATAGCAACGTACATGGCTGGCGAGTTAAAGGTTTCGAACATAATCTGTGTCATCTT
TTCTCTGTTGGCTTTAGGGTTGAGTGGCGCTTCCGTCAGTAAAATTGGATGTTCTTCTGG
TGCTATCCGGAGTTCATTGAAGAAAGTGTGATGCCATATTTTCTCCATATCGTCCCAGTT
TGTGACG
>contig_97 Average coverage: 13,04
AACATAATCTGGGTCATCTTTTCTCTGTTGGCTTTAGGGTTGAGGGGAGCCTCTGTCAGT
AAAACTGGATGTTCTTCTGGGGCAACACGAAGTTCATTATAGAAAGTGTGATGCCATATT
TTCTCCATATCGTCCCAGTTTGTGACAATCCCATGTTCAATAGGGTATTTCAGAGTAAGG
ATTCCTCTTTTGCTTTGGGCCTCATCCCCAACATAGCTGTCTTTTTGTCCCATACCAACC
ATTACACCCTGAAAACCACAAAACG
>contig_98 Average coverage: 7,68
ACGTTCAGTTAAAATTTTCATCAAATAGTCTGTGAGATCCCGTCCGGCAAGATCCAACCT
CATCATAGCATGAGGAAGGGCATAACCTTAATAGATGGGTACAGTGTGGGATACACCATC
ACCAGAGTCCAACACAATACCAGTTGTACGACCAGAAGCGTATAAAGACAAAACGGCCTG
AATAGAAACGTAAATAGCTGGGGAGTTAAAGGTTTCAAACATAATTTGGGTCATCTTTTC
TCTGTTTGGCTTTAGGGTTCAGGGAAGACTCGGTTAGTAAAACGGGATGATCTTC
>contig_99 Average coverage: 18,92
TATAACATAATTTTTCTTTAATGTCTCTTACGATTTCTCTCTCGGCTGTGGTTGTGAATG
AGTATCCACGTTCTGTGAGAATTTTCATAAGATAGTCTGTGAGATCCCGGCCGGCGAGAT
CCAATCTCATGATAGCATGAGGGAGTGCATATCCTTCGTAGATTGGTACGGTATGTGAAA
CACCATCACCAGAGTCCAACACAATACCAGTTGTACGACCAGACGCGTATAAAGATAATA
CGGCCTGGATAGCAACGTACATAGCTGGGGAGTTAAAGGTTTCAAACATAATCTGTGTCA
TCTTTTCTCTATTGGCTTTAGGGTTGAGTGGCGCTTCTGTCAGTAAAACGGGATGTTCTT
CTGGTGCTACACGGAGTTCATTGTAGAAAGTGTGATGCCAGATTTTCTCCATATCGTCCC
AGTTTGTGACAATTCCGTGTTCAATTGGGTATTTCAATGTAAGGATTCCTCTTTTGCTCT
GGGCTTCATCACCAACGTAGCTGTCCTTCTGTCCCATACCAACCATCACACCCTAAAATA
AAACATTTTAGAATAAATTAACTGACTGATTAGATGCACTATGTATTTATACATATAAGT
TTCAAAACATTTGATT
>contig_100 Average coverage: 28,34
GTGATGACCAACAATACGTTCAGTTGTTACAACGACATCCCTGCTTCTCTTATGCTGATA
ATCTGCCATCTTGCTGCAGTTAAGAGTTGTCAAGGACCCATTACAAGGTGTCAATCACAT
AACTTTAAAAACTTGGTTATTTAAAGTGTTGAAAACAATGAGGATAAAAACATCTGTTTT
GCTGTTTACGGGTACAGTAGCTGCATGTGCAGATAAAAAATATCGAGTCGATATTCATTG
ATTAAACTCAGGTGATACTTAATAATGTTTAACTAGTTCTATTTTACCAAA
>contig_101 Average coverage: 2,86
TTTTTTTAAGACTACAACGTAATGGGCCACTACAGTCGATGAAACTTGAATGTCGTGGTT
CCGATGATGTTTTGTCACATGGCGACAAAACCTGGAATCTAACGTTTCTTTGAATCATTC
TGAATAAACTCGGTAACTATATTCATTGGAAGACACCGATTTGCGAATGCACTCTTCGGC
GATTTTCAAAGCTTTCTCTGCATTGTCTTCATAGGAATATTCAGCATAGAAATCTGGGTT
GTTCGGACATAGACGGATTGCAGTTCTGTAACATCGCTATGAAAATTCTAAGTCATCTGC
TCTTTTGTAATTGCTTTTTTGTCCACAAGTTAAAGGCACAAACAGCATTGCTAAACCAAT
TTTAGTTTATTGTTCGACTTTGCAGGAACAGAAAAAACGCACATCAAAATCAAAAAACGA
TTTTATCTTTCTGAAACATAAAATGCATTTAACCTTTTTACCTCTAGTGGATACCAGACC
ATAAAAATTTTCTAACTTGACAGGTTAGTCTGCGCAGTTTTTGTCGAGCCTGCAGCTTTT
GTCGCAGAAAGCTCGACATAGGGATAGTGATCCGGCGGCGGCGACGTTAGCTAACTTCTT
AAAGCTTTATAATTTAGAAGGTGGAAGACCTGAATGCTTTATACTTTGTATATGGATACC
TCATGTTACGAAGTTTCCGTCAGTCAAATGTCCACTGTCCTTGACCTCATCAAGGTTCAT
TGACTACTTGAAAAAAATGA
>contig_102 Average coverage: 4,87
AGATATATAAAAGTTAAATGCATTTTGTGTTTAAGAAAGATAAAATCTTTCTTGGTTTTT
GATGGGCATTTTTTTTCCTTTCTGCAGAAGGTGTAAAAATAAACAAACACCTGAATTACT
TTGATACTGTCCACTTACTGACTCAGGTAAACTCTTTAACTCACCCAAAGTTATGAAGAA
ACCTGTTGTCAAGGTCAATTAAGGACAATCAAAACAATACAAACCGGTTTTTTACCTGAG
GGAGCATCTCATAGTTGTACCACAACTTAGTTAATTTTCACACCTTTTGCATGAAGGAAA
AAAATGCCCATCAAAATCCAAAAGAGATTTTATCTTTCTGAAACACAAAATGCATTTAAC
TTTATTATATCTAGTGGATGCCAGGCATTAAAACTTTTCCAACTTCACAGGTAAGTCTGT
ACTCAGAGTAATTTTTGGCATGTAAATACAGCCATAT
>contig_103 Average coverage: 2,77
TAACCCCACCGCATTTTTGCGCCTGTCCCAAGTCAGGAGCCTCTGGCCTTTGTTAGTCTT
GTATTATTTTTAATTTTAGTTTCTTGTGTACAATTTAGAGTTTAGTATGGCGTTCATTAT
CACTGAACTAGTATATATATTTGTTTAGGGGCCAGCTGAAGGACGCCTCCGGGTGCGGGA
ATTTCTCGCTACATTGAAGACCTGTTGGTGACCTTCTGCTGTTGTCTGTTCTATGGTCAG
GTTGTTGTCGCTTTGACACATTCCCCATTTCCTTTCTCAATTTTATATTCATGACAGGAA
CATTTTGATATAATATGAAAACTATGCTATTCATTAATTACATTACTTTTATTACTAGTA
CTTCCACAAGGGGGACACGTCATCTATCCAAAACATGTTATTCTAACCCCTTCCCTTTTA
ATGTCGTCACTACAAATCACGTCCCCTTTTTACCCCAAATGTGGCCTACCAAATTAGATT
TATCAATGGATGTGCAGTAACACGAGCAAGGCGATGGGTGCCACATTTGGAGCAGCATCT
TCTGAGCATTTGAGATCCCCTCCAGTTTTTGGAGGGGTTCGTGTTGCTCAGTCTTTAG
>contig_105 Average coverage: 4,82
CATGTTTGCACCTGTCCCAAGTCGGGGCCTCTGACCTTTGTTAGTCTTGTATTATTGGTG
ACCTTCTGCTGTTCTATGGTTGGGTTGTTGTCTCTTTGACATTCTCAATTTTATTGAAAG
CAACATGTTGATCACACCTGTTGAATTAAATATATCATTATGAATTTTGGTATAATTACC
TCTGTGTGATTTCAGTTGAGTTTCCCTTCTCAACTGAAATATCCTGTAGTCTTGTCAACT
GTTCTTGAGCAATTTCCTTGGACTTATATTGGTAAACCTGCCTGTAAATATGATTGATTG
ATTGT
>contig_106 Average coverage: 12,30
ATGTTACGAAGTTTCCGTCAGTCACATGTCCAATGTCCTTGACCTCATTTTCATGGCTCA
ATGACCACTTGAAAAAAAGTTAAGAATTTTTGTAATGTTAACTTCTCTCTTGCTATAAGA
AATAGGATAACTATATTTGGTATGTGCGTACCTTGCAAGGTCCTCATGGCCGTCAGACAG
TTTTCACTTGACCTCGACCTCATTTCATGGATCAGTGAACAAGGTTAAGTTTTGGTGGTC
AAGTCCATATCTCAGATACTATAAGCAATAGGTCTTGTATATTCGGTGTATGGAAGGACT
GTACCCGTTTTTAAAGCTTTCACCTACAATACGATTTTCGCAAATACTACACAACACAAA
ACTTGCCTTGAGACATCGTTATCGACAACATTGTTGTTCGACAACAGAGAAGTGAAATAA
TCGAGTTTATTATACTTTACGTTAAAATATCATACGAGGGTGTTAATTTA
>contig_107 Average coverage: 2,56
TGTAAGGTGTATATGTTCATCAGGTTGGTGTTATCTGACCTTGACCTCATTTTCATGGTG
TTTATCGTCGTAAATGATTATAAAAAGCTCTTATAAAACCCTGAACCAATATCTACCAAA
CTTTAGCTGCATGATCCTTAGGTTACCTAGAATATATAAGTTTGTGCATTTTGTTCCTTC
CTTCTTGTCAACCAATCAACTATGACAGCCATGGATAGGAATAGGACAGAAGGGTAAATG
CATTTATTTTATTGTATCTTGAAAATCTGACATTAACAAAAATGTTCACAATGTCAAGTT
CTTTCTATGTCCGCCATAATTATCAGATGTCTCCTTACATGAATTATTGCCCTGAATTAC
ATTTTTTTATACGACTGCAAAAATTTGGTATGACGTTCAATGGCGTCGTCATCGTCGTTG
TCGTCTGAAGAGGCATGGTTTTTGCACTATAACATTAGTATAAGC
>contig_108 Average coverage: 10,57
TGTGACGTCATCAGACATGGTCGCCTTTTTCATGATGCAACAATAAGAAAATTCAGAAGA
AAACAAGAAAATTTAACGTCACCATTAAATTTCAACCAATCGTTTGCTGAGAACAGATTT
TTCATTAGTGAGTAGAAATATTTTTCTCACACCGGTCAGGAAATTTGAAAATAGCACAAA
AATTAGAGAAACCAGTGCAAATAATACCAAAATTTAAAAAAAATTGTTTTTACAAAAAAA
TGTTTTGAAGTTTTAGAATAAGTTATCATTCAAAAACAAAATAAAATTAATAATAAAGCA
ATATTTTCCTTGTTTTGCAGAATCAGTCAAGCAGTGATTACAGGGCACCAGACTCAGCCA
GGTCATATAGTGAAAAAACATCACTGAAAACAGCACCTTCCTCATACAGTGAGAAAACAA
AGACAGGATCTTATACATCATCAAGGTGAGATATTATACTGTTAAATTATATTCAGGGAT
CTCTCCATTAACATTTTTTGATTCAATTTTTGAAAAGAGAGTACAAAATTAATGATGATT
GATTGATTGTTGGTTGCTTAACGTTCAGTGGCAAATATTTCATGCATATTCAGGACGAGA
ACAAGTTAACAATAAATACAATAGGTAGGTTGTTGTAATAGAGGCCATC
>contig_109 Average coverage: 11,45
GATGGCATCTATTACAACAACCTACCTATTGTATTTATTGTGAACTTGTTCTCGTCCTGA
ATATGCATGAAATAATTGCCACTGGACGTTAAGCAACCAACAATCAGTCAAACCAACTGT
CATTTTGATGATTCTTACCAACTGTTTTTTAAGTAGTTTGCCGAACGATATTCAACTTAC
GTTGACCATGGGTTCGTTGTAAGATCTTCTGACTTAAATTAATTTGTTTGAATGATCCTT
AAGATATCTCGAGAAATTGTATACAATATAGATTGTGTTTGAAGAGCATTGAGGACGTAG
TAAAAAAATCAAAAAATAATTCTTACCAAATAGGACCATGTTAAACCGTGCAAAATAAAA
TGGTTTTTGTCTTGCATTTTTTTCTGAGCCATCTTTATAGGAAGATTTCATAATTATTTG
GCAAGCGTTCCTCTAGACAGCTAGCTGTTGAACCATGGGGGAAGAGAGGGCGGGGTAGGA
GGGGTCCTGATTCCGAAATCCCTAGGTCCCTTATTTAAGGATTTACTCCTGACGATTTTA
ACGTAATTTGGAAGTGGTCAACGAGAGATGTCGCAAAATGTCCCATAAACGTCGCGGAGC
AGTTGTTTTCAACTTCGACACAAGTAATGTGCAGACAGAACGTGACACACTGTCCTTCCT
TGACATCTGAAAGTTTGGATATAGTGTAATAAAACACTACGACAATACATGCCGAATTCA
AAATTGTAAGTGCATTTTCATGATATATTAACTGATTGATTGATTGTTGGTTGCTTAACG
TCCAGTGGCAAATATTTCATGCATATTCAGGACGAGAACAAGTTCACAATAAATACAATA
GGTAGGTTGATACAATAGAGGCCATCTGGGATGATGGTCGGGGAAATTTGGACTGCCACT
GGAAAATGAGGGTATATTGGATAGGGACAGAAATTTTGCCTTGCAACAGGCCACCTACGG
ACCCCTCAAAGAGTTGTTGCAAGGGTTCTTAACGTGCAAAGAGCGTGGCACTCTCTTTAC
ACGAGGCATCGGATTTAACGTCCCCCTTCTGACCGGACGTGACTGCGAACTTGATACATC
CCGCACAGCCAAACGGACGCCCCACTTCGGCAAGCGTTTTACTGCCGGTCGGGAGAAGAC
CAAGTGACCATATA
>contig_110 Average coverage: 3,33
CAGTCTATGGAAGAAGCGTATCGATAAAAATTTCTTATATCACATAGCGATATTGTCTAA
TATCAATTGTAAATATGCAGACATTCCATGCGGAAAATGTTGTTTTCGGCAACGAAAAAT
TAAGAAAATACTAACTTTAAAACTTATTGTTCAAATATAAACAACAATTGAGTCTAAATA
TACATTCAGAAGTTAGTTAGAAGCTAAAGTTTATGTCCGTGTAAAACTTGAAGTGCTGTG
TTTTTCTTATATACATAAATAAACAATGCGATACTTTTAAAATATCAATGCGATACTTTT
AAAATATCATAGCAGTGTTTTTCTTATATCAATATTAGTGCCGATTAGTATTAATATTAG
ACTGTTGTACCCATATTTTGACAATTTTACCTATTATGTCTGTTTTGTTCAC
>contig_111 Average coverage: 103,17
AATATGACAGTTGTTGTCTTTTCTTTTGATGTGCTTGAGTCTTTTAGTTTTCCATTTGAT
TAGAGAGTTTTCGTATTGAATTTTCCTCGGAGTTAAGTATTTGTGTGGTTTTACTTTTTA
TATTTATTTAAGGCCACTTTTCACTCTATATATATAATATATATATATATATACAACTCG
TCTAAACATCAACCCAACAATGTTAGATCTGTAAATTTGCTTTCGCAAATTTTTTGTTCT
TCCCTCGCCGGGATTCGAACCCATGCTACTGAGATATCGTGACACCAAATCGCCTGCACT
GTAGCCGTCCCGCTAGACCACACGACCACCTGGGCTTCATAAAAATGAAGCTTTCGGTGG
CCGGGTGTTACCTTTCCACGTCAGTTTTAATCTAGCGTCGTACTACAGTACATGATATAT
AAGGCATGGAGATGTTATTTTTACAGATCAGCTAAATTATCTATAGTAAAGGATCCTACA
AATTAATGTTCATATATATACATATATATATATATAAAAGTAAAAAGTAAATTCATGACT
TTTTCCGTTATCTACAAACAAACATTGCGATCAAAATTGAAGATGAGAATGATGTTTTTG
CAAAACCTATTATAATTAGTAAACATGGGTAACTTAATTGATTGTTGGTTACTTAACGTC
CAGTCA
>contig_112 Average coverage: 5,21
TCCTCGGAGTTAAGTATTTTTGTGATTTTACGTTTTCTGCATAAATGAAACAGTTTCAAA
ACCAGTTTGCCTACAATGATTGAGTAGTGATGAGTTTAACTTTGAAATTCGTGTACTCGA
AAATATTTAAACAGCTGTTGATTTGTCATAATATAAAATACTATGCATCAATGTTATCTA
GAATGTATTTCAGAGAAAAGAAATAAACAGGAGAAATAGTACCGATTTCAAATCATACAC
TTTCTATTCATTGTATTACATAAAATTGTTGTAATAATGTCCAAGTGCTGAAAGTTCTGC
TGAATTTTCCTTCATCAGACTCGCTGAACCATCAACCCAGGAACCATCATTATGGTGTAA
CCTTCTACTAACAAACCAAGCGTATCGAAAAACATACGGTGCAGACTCCAAAAGTGGAAG
AAGCTCTCTCATCAACCGAAGCTGTTCATTAA
>contig_113 Average coverage: 793,58
GAAAATTCCAACTTCAAAAGTCAACTCTGCTTATGCCAGTGACCATTCCTGTAAAGTTTC
ATCCAGTTTGCAGCATTTTTTTTTTTTGAAATTTTTGACCTTTTTGCATTGTTTCCATGG
TAACAACAGATATTTTGGAAATTCCAACGCCAAATTCCACATCTTCCAATGTTGCTCATC
GTTACTGTGAAGTTTCATGAAGTTTGGAGCATTTTGAGATTTTTGAAATTTTTGGTGTAG
TTTCCATGGCAACATAGTAGTTCCAATGAGTGCCAAAATCATCCAACACCTGTATATAGT
GGGCACCTACATTGTATTAAAATATAATGATTCTGAGTTAAAGCATATCCAAACAGTTCA
CCAAAACAAAAAACTGGATTTTTTCACATTTGTTCTGTTTCCATGGTAACGGCAGCCATC
TTGATGGTGCCATACCCCACTGCACTATAGAATGTGGTGGTCTACATTATGGTATAGTTC
CATCAATATTGTTCAAGCCAATTCCGAGAAATAGTATGGACAAAAAAGT
>contig_114 Average coverage: 190,38
AACAGCATGAACAGTGGAATTTATTTTAAGACTACTGACGATGTTGACTACATATTGACG
ACAAACAATATTCCTACGACTTTTGCCATTTGGGAAATCTAAACTACTTGTCTTTAGAGA
TGTTCGGCAATTAAACATTTCATACGTTTGTTCTTTGACAGCTTAGTCAAAATCTCTGGG
GATAATAAACTACATACAGATTCCTAATGTGCCCTACTTCCTATGTGCAACTTTAAAACT
TCTGGATAAATCGACGATCATTTAAGGTTTTTCTGGTCATATTTTTTGTAATCAAGAATT
AAAAGTATGAAAAAACTGTCCAATTAGTTATAAATAACATAATATCCAGCTAGATAATAA
CAATGGCACATATGTCAGCATTTATTGGGTAGAACACAAATCTAGGGCGCTCGCATAAGG
CAGCTTAACTGCCTAAAAATGAAATATGGATAGAAATAGACACATATAATGACATAATTA
CGATGTCACAATCTTGTCTTGTATGCATCATTGATTTTATGTATTTCACTATAACATGTG
CATATTTGAAGCAGTTCTTCATTGGCAATCATACCACTATCTTCTTTTTTATATTATACC
CGATCGCTTCCGACAGTACACGACTTTAACTCGACCATTCACTACTTCTAAATTACTCAG
GGCGTGAGTCCTATAACGACTCTAACGTGACCACTGATTGAATTCATATACGATTATTCC
TACCAACCTAACATCTTTACTCGACTAGCTAGACCAAATCAAATATTCTCGATGTCAGCC
CGATCTCGACCAGACCAGATCAACCTGATCGTATAGGAGTCGCCCCTAGGGATACCCGGG
AATTGTCGTATATGTACTATTTCAGTATAAAGCTAGATTCACACTGCCGACCAGATCAAC
TCAAT
>contig_115 Average coverage: 49,40
CGCGTCACGCTTAGACCCATATGAGACCCACATATAGCATAGCCGTTACTTTTCAATTAT
TGACAATTTCTTTTGATTCTAATAAAACATAAGAGGATCCTAACAAGTTGAATCGATATC
TGTCAAATATTGAAATGATTGATTGTTGGTTGCTTAACGTCCAGTGGCAAATATTTCATG
CATATTCAGGACGAGAACAAGTTCACAATAAATACAATAGGTAGGTTGTTATAATAGAGG
CCATCTGGGATGATGGTCGGGGAAATTTGGACTGCCACTGGAAAATGAGGGTATATTGGA
TAGGGACAGAAATTTTGCCTTGCAACAGGCCACCTACGGACCCCTCAAAGAGTTGTTGCA
AGGGTTCTTAACGTGCAAAGAGCGTGGCACTCTCTTTACACGAGGCATCGGATTTAACGT
CCCCCTTCTGACCGGACGTGACTGCGAACTTGATACATCCCGCACAGCCAAACGGACGCC
CCACTTCGGCAAGCGTTTTACTGCCGGTCGGGAGAAGACCAAGTGACCATATTTCTATAC
CCCAGTCACCCTTGGGGTTAAGTATATTTAAACAAACGCATTTGACTAACAGGTCGAACA
ACTGATGTTC
>contig_116 Average coverage: 311,28
GGTCAAGTCCATATCTCAGATACTATAAGCAATAGGTCTAGTATATTCGGTGTATGGAAG
GACTGTAAGGTGTACATGTCCAACTGGCAGGTGTCATCTGACCTTGACCTCATTTTCATG
GTTCAGTGGTTATAGTTAAGTTTTTGTGTTTTGGTCTGTTTTCTTATACTGTATGCAATA
GGTCTACTATATTTGGTGTATGGAATGATTGTAAGGTGTACATGTCTAGCTGGCAGGTGT
CATCTGACCTTGACCTCATTTTCATGGTTCAGTGGTCAAAGTTAAGTTTTTGAGTTTTGG
TCTTTTTTTCTAATACTATATGCAATAGGTCAACTATATTTGGTGTATGGAAATATTTTA
TGATCTATATGTCAGTCGCGCAGGTTTTATTTGACCTTGACCTCATTTTCACGGTTCATT
GCTCAGTGTTAAGTTTTTGTGTTTTGGTCTATTTTCTTAAACTATAAGCAATAGGTCAAC
TATATTTGTTGTATGGAAGCATTGTTAGCTGTACATGTCTGCCTGGCATATGGTTCATCT
GACCTTGACCTCATTTTCATGGTTCATGTTAAGTTTATGTGACAGTCGTAATAAAGCTTT
ATATTTAGGAGTATCAACATAATATCAATGATTAGTAAAGAAGGCGAGACATTTCAGTGT
GTGCACTCTTGTTTTTGGTTTTTGCACCATAACTTTAGTATAAGTAAATAGAAATCTATG
AAATTTAAACACAAGGTTTATGACCATAAAAGGAAGGTTGGGATTGATTTTGGGAGTTTT
GGTCCCAACAGTTTAGGAATAAGGGGCCCAAAGGGTCCAAAATTAAACTTTGTTTGATTT
CATCAAAAATTGAATAATTGGGGTTCTTTGATATGCCAAATCTAACTGTGTATGTAGATT
CTTAATTTTTGGTCCCGTGTTTTCAAATTGGTCTACATTAAGGTCCAAAGGGTCCAAAAT
TAAACTTAGTTTGATTTTAACAAAAATTGAATTCTTGGGGTTCTTTGATATATACCACTG
GGGGGGGTTAAATTTTTCTCATTTCAGATTTCATAAATAAAAAGAAAATTTCTTCAAACA
TTTTTTTGAGAGGATTAATATTCAACAGCATAGTGAATTGCTCAAAGGCAAAACAAAAAT
TTTAAGTTCATTAGACCACATTCATTCTGTGTCAGAGTCGTAACTGCCAAGGCACACAGG
GGGATA
>contig_117 Average coverage: 545,57
ATTGATAGATAAAAATATGTTTTTATTAAGAAGAAAGGGATTAGTTTTTATTAGATATAA
AAAAAATATATTTTATGCACACGCTAAAAATTGGCCATCAAAACAAAAAAATTTCAATTT
CCTTTTAAAGAATTTATTGAATCAAAACCATGCAATATCATTTCCTTTCTAACAGTGAAA
TTCTTCTTTTTCATAGGGACATATTTGATAGGTGTAGCTTCACCCTATCACATCAAATGA
GAATAGCCTCGTGAGAGAATTACGATTCGCTTGTCCCTTGTTAGTTATTGTCGCTTCGTC
ACTAAATTAAACTTCTTGTCGCTGTTTGTCTCTAAAATTCTTCTTGTCTCTTATTAGTGA
GACCAGTCAGTTCCGTCCTTAACTTCCGTTTTTGCACTGCAAAACAATCACACAATTAAC
GATGCCTAGTCCTTGTTGGTGTGTACCTGAGTGTCATTTAAGAGGAGGACTTGCATTTCT
AAATGACTTAATAAGAAGGAAAAGTTGGATCAACGCCATGGCTCAAACGTAGATTGTCAT
GTGCGATGCAATCGTAGAACCCATATCAATCAGCTGTTGTTTGCAAGGCACATTTTACTG
AAAACGACTACGTTCAGGAAACTATTCATGGTAAAACTTTATTTTCTTTAAGAAATATAT
ACTGTTATTTATATAATCGCCATGCAAGTAAACCAAAGTCTGTTTGCAACCGCAATTATC
GTTTTAGAATAAAAAGGGGGGTGAATTCAAGACGTCATAACTTTTGGGATTACGATTCAA
TATCATCTGTTTGACATTTTTTGGTTAATACTACAATTGTATGGTTTTTCTACAAGAGAT
ATATTATACTGATAATTATTTTAGCAGTAATTATGTAAATTTCGGTTGTAATGACAAGAA
TTCATGAGCTATGCCTCGGGCTTTCTTGAAAAATATCAATGACAATGTAAACAGGAACAA
AACATTGACATGAATGATGCTCTCCACCTATGTTATAGTTATTTAGGTATGTGTGTTGCA
CAAGTCTTTCACAAGTTTCAAAAAAGCTAATGTTATAAAACTTTTTTCAGGGCACATACC
CACTTTATAGAGACTTGTCTACTGCCATGCATTCCCATCCTATTTTCATGCACCATTTGT
AAGCAAGAGACTGAATGGTTTACAAAATTAAAAATCAGGACGGTGTCCCGTTAAACCAAA
AGAACTAAACTGGATGAATATTGTAGGAGAAATCTAGAGGAAAGTTTTGATTTGTGAAAT
TGGTTTTCCTGAACAGATGTACATTCATCCTGCAGGAAAGATTTATAACTGTCCACCACC
AACTGACGAGCTAATGTTGAGCTTCACAGATGGAATTACTCAAACACCATAAATGCCTAT
GTTTTCAGCACAGATTTCACAAATCATGACACAGCTGTGCATTTTTATGCCCCACCTACG
ATAGTAGGGGGGCATTATGTTTTCTGGTCTGTGCGTCCGTTCGTCTGTTCGTCCGTTCGT
CCGTCCGTCTGTCCCTCTTCAGGTTAAAGTTTTTGGTCAAGGTAGTTTTTGATGAAGTTG
AAGTCCAATCGACTTCAAACTTGGTACACATGTTCCCTATGATATGATCTTTTTAATTTT
AATGCCAAATTAGAGTTTTTACCCCAATGTCACGGTCCACTGAACATGGAAAATGATAGT
GCGAGTGGGGCATTCGTGTACTGGGGACACATTCTTGTTTATTTTATTCTGGTATCACCT
AAGTTAATAAAGGTATG
>contig_118 Average coverage: 57,69
GTTTGAACCCCTGCCTCCAAATTGAAAAGATACAAAAATTTCGTCTTATAATTTAAAATT
GCCGCCAACAGCATGAACAGTGGAACTTATTTTAAAGACTACTGACGTAGTTGACTACGT
ATTGACGACAAACAATATTCCTACGACTTTTGCCATTTGGGAAATCTAAACTACTTGTCT
TTAGAGATTTTCGGCGATTAAATATTTCATACATTTGTTCTTTGACATCTTAGCCAAAAG
CTCAGGGGATAATAAACTACATAAGGATTCCTAATGTGCTCTACTTCCTATGTGCAACTT
CAAAACTTTTGGGTGATTCGACGATCATTTAAGGTTTTTCTGGTCATATTTTTTGTAATC
CAGAATTAAAAGTATGAAAAAACTGTCCAATTAGTTATAAATAACATAATATCCAGCTAG
ATAATAACAATGGCACGTATTTCAGCATTTATTGGGTAGAACACAAATCTAGGGTGCTCG
CATAAGGCAGCTTAACTGCCTAAAAAAATGGCTTAAAATTATTCCCAAAAAGACAACTTT
TTTTCCCAAACAGTGCAGTCTCAGTAGTAATTGTGCATGAATACAAACTGAAAAACACTC
ATTTAAACAGATTTCATGCCTAAAATGACTATATGCGCACATTTGAGGGTATCATCACTA
ACAAAATGGGGTCTTATTTTAAAGCAGGGTTTGACTCTTGAAAATGTGTCTGTAAATTGA
AGTTTC
>contig_119 Average coverage: 18,67
ATGTATCATAGATTGTTCTCTATGTCCTCTCATTACCATCTGTTGTTCCTTTAATTGTTT
AACAACCTGTAATAAACAAATAAAATGAGTTTTATGTCAATGGCAAATATTTTTTCCCAT
CTGTATTTCACACATTTCATATTATTTTCTCAGCTTTGAATCATGGAGCCCAATATGACA
TTTTAGGCACTTTACCTATTTACTGTTCAGTTTAAATAATAGTGTAAACCTCATATATGG
ACCAAAGAAATGTATATCATTTATCCTATTTATTTTTTATCAAGCAAGTTTTAAGACAAG
ATAGTTATTTTTAGATATTTCATTTAATAAACATATGGTTATGTTAACTTAATAGGTTTA
AAACAGGATCATTACTGGTGTAATATTTAGTTTACCTAAAAGGTCCTTTTCCTTAAAAGT
TTCAAAACTTGCTGAATTCCCCAAAAGACCCACAACTCTTAAAACATATATGTGACAATT
CATGTTTAAAATACTTACATCTTTAGCACTAGATCCTGATACATCAATCCATGTCTTAGA
AAAGAAAGCACATGATCCCAACATGAAGAAAATGTAAAGAACAGCGTGTACTGGATCTTC
TCCAACATGTGATAACGTTTCTGGTGGCGAGAGATAGTAACATAATCCTCCAATAGGGTA
AGATCTGGCTGGTCCACCACCTCCAACATCCTACAAAACATCATTAATAACTCATCAACA
AAGAAAATAACCTCTGGTATGTTAATACATGTACAAATTTTAATATCAGTATTTTGTGTA
AGACTCCTAACATTTTTAAATTAGTGTTCATCTATAGCATTATTTGTTCTAGGTTCAAAT
CAATCTGCTAAGCATGCAGCATTTACAACTTGGAGACTGCCCTGTAATATATCAAGGTTG
TATAACATGCCTTGTGGAGGTTTCATATCTTATGAAAATGTTAATTATCTAGCTACTTTC
GTAACTATTTTATTTAGTTAATGATGATTTTAAAATTTATTAGGCATATTCTTCCATTAT
CATTTTTCAGAAATAAGTTGTGAGTTTTTTTAACATTCAATTAAGTGCATCCAATTTTTA
GACAGAGAGGAAAGGAATGGTACAAGAAATGTGAAAAGCCTGACATTGAATTGTATAATA
AGGTAATACAATTTATACTTACAGCCCATACTCCTAACAAGTTGATGAAAAAGTTTCCAC
TGAATTTTGTTGCCAACATCTACAAAAGAAATGATATCATATAAATCAATGTACATTTGT
ATAGACTGAGGTTTTAATATCAAAATTAAGTCTATTTCACTAGATTGGTTCCAAGATTAT
AAGAACTTATTGTCTCAATGAACATATCATATCAGAGATTAACCAAATTATTAATAGCGT
TCTATATATGATACAGTAAAAATGAAAGCATCATGAATATTTCTTTTCAATGATCTTTAT
AAATGAAAATTATATTCTTCTACATTTAGGTGCTAATGAAATAGTTTTAAAACATTCTGA
TTAAAACCCAGTAAGCCAGTTGAACAAAAAATAGATTTTCTGTCAATCCTAATGAATATC
AAATTACCTGAGAAATGACATAAAGATTTGAGACTAGGGCAGACTGTAAGATAATTGGAA
TGTTGGATGTGTAAAACAGTTTGATTGGGTAAGAACTGTACTGTCCCCTGTAACGAGCTG
ATTTGATTGGTAAATCCACACGGAATCCCTGAAAAAAAAATACATAATGATAGGACTAGC
AGAAATATGTCATGCAATGGCTTAATATTTGAATTAAGATGTTGACAAAAAATTTTATCA
CTGTAACAATTTGTAAATGAACAAAAACTCTTTCTTAAAATCTTTAATCATAAGAGAAAA
TTGTCTGAACTGAATCTATTTGATATGAATTTTCTTCAGTTCTTCATTCAGAAATTTAAC
AAAAATATTACAATAGAAACAAGTTTTCTTGTATAATCAGAACTTTTTAATAACACACAG
TTCCTTTTTTCTTGTTCTTAATATTACCTGGAAATATATGACTATAGCAAACACCAATAC
TGTTGCCAACAAATTCATCAAATTTGGAAGATTTTGTCTGTAGAAAGCTTCACGTAAAGC
TCTGACTTTGTCATTCTTGGTGGCAATCAAATGGAACAGTGCTATAATAGCTCCTTCAAA
CTCGGTACCTCT
>contig_120 Average coverage: 1,27
GTGATCTCAGAAGATGATTAGATGAGTCAAAGGGTCAGAACCTTAATCAGCTCACTAAAA
TGAATCAAAATATGCTAACAGGTGTTAATGAAATTGACAACGCACAAAATAGCGATAATC
GTAGATTATCAGATTTATCCAAAGCTCAGACTTTAAAACTGATAATTTAACTATCTCAAT
TGGATAAATCCGATAATCCACTAGTATCAATGTAAGAATCTATATTAAATCATTTTACTT
TTATGTCTAGACATCGAATAAGCTATATTAACATACTCCTCTAAGCTATTTAAGAAATTA
TGTTTCATCATACAATAAGTTTTATATTCATAAAGTAATTACAACTGTAAAAGACCAGAA
AAAGCAAAAGAAACAAAACATACCGGCTTAAGCAACCATTAAGGAGACGGAAATATCACC
TATGCATGGGAAGTTTTACAATCCAAGGTGGCGGTATAGATTTAATACTCAAATACAAAT
CATATAAACATCTTAAAGAGGCATTGTCAAAAATTGAGGGGATACAAAAGGAAAATAAAA
CAGCAAAACAAAAAACAAAAAACACAATGACTAAAGGAAGGAAATAACACAAAAGTGGGT
CTCATTGGGTTCTAAGCGTGACTCGGGATTGCCGTATTTTTGTAAGCGTGAAAGTCAAAT
TATTGTGCCGTG
>contig_121 Average coverage: 7,90
AATCTAGCGGCGTACTACAGTACATGATATATAAGGCATGGAGATGTTACAGATCAGCTT
GTATATATATACGAGTCTAAAATTGAATATATATATATTTCTCTAATTCTATGGAAATTT
ATCCCTTTCCGAACCCAATTGTATAAAAAAAATTAATCAACGTGTGGTTGCCGGTGATCT
CAAAAGATCATTGGATGATTTTAAGGGTCATGACCTTTTTAGCTAACTGGATGAATCAAA
ATATGCTATAACAGGTGTTAATGAAATTGACAACTTCGTGCAATGTGAAAGGCACTCGAA
GGGGATTTTCGGTTAACAAAAAAAGAAAATGTATTTTTAATCATTAGAGAAACAGATTCT
TACATAGTTACTCGTGGATTATCGGATTTATCCAATCTCGATAGTTAAATTATAAATTTT
AAAGT
>contig_122 Average coverage: 7,41
ATTCTTGGAACGAAGACTCCGATCTTTCGTATTGGTGTCATTAAACATGTAACCTTTTCA
CTAAAAGGAATATTCATCGGAACTATTTATTCTATTGTTTACTCTTTATAATTACAGTTT
TGGGAAGTCATCTCAGATGAGCACGGTATCGACCCCACCGGAACATACCATGGAGATTCA
GATTTACAATTAGAAAGAATCAACGTCTACTACAATGAAGCTACAGGTATGAAACAAAAT
AAAAAATATAGGAAAAACTCGTGAAAAAGGAAATGTATAATAAAAAAAAACTTCTTTAGC
AAGGCTACACTTAAAAATATATTGGTTTACCCAAACCTTACCCAAAGGTAGAGAAAGTGA
GTAGGTAGGTAGGCTGGGAAGAGAAATTGAAGTTTCAGATGTTTGTAAGCCTTCATGCCT
ATCTAATTCAAAAAACTTTTTTCACATAAGGACAATAGAAGATTTTGAGTAGACCGCTTT
TAACCGGGAAGCTAGGGATAGGGCAAACACTTGTAATCTTTTTTATGGTCCAATACTCGC
TCATTGATAGACCTGCTTAAAGTGCGTTTAATGTTCTTGAGATGTGTTCAACATATAAAT
CTTTTAATACCATCCTCCTACTTTGTGTTTAAGTTTCCTTTTTGAATTGTTTAAAAAATT
TGAAAAGGTGCATGTTACTAAAATAAAACCTTTAAGTTATAAAGTCAATACAACTAAAAA
CTATACAAAATTAGAAAAAGAGAGATATATATAAAGTCACGTCATGCATGCCATTATGAA
ATCTGGTACAATTAACATAAATTAATTTCTGTCCTCTTTTTACAGGTGGCAAATATGTAC
CACGTGCTGTCTTGGTTGATTTGGAGCCCGGAACCATGGACTCTGTCCGATCTGGACCAT
TCGGTCAAATCTTCAGACCAGACAACTTTGTTTTCGGACAGAGTGGTGCAGGAAACAACT
GGGCCAAGGGACATTACACAGAGGGTGCTGAACTTGTAGACTCCGTTCTTGATGTTGTCA
GGAAAGAGGCTGAAAGCTGTGATTGTCTTCAGGGATTCCAACTTACACACTCACTTGGAG
GTGGAACCGGATCAGGAATGGGAACACTCCTTATCTCCAAAATCCGTGAAGAATACCCAG
ACCGAATCATGAACACATTCTCAGTTGTACCATCACCAAAAGTAAGTTTTCGTTAACATA
AATACAAATTCTTTGTTTTAAATTTTTGTTTTTGTTTTGCTCTAGTCATTTTTGGGGCCT
TTATAGCTGACTTTCAGTGTGAGTCGAGGCTCGATGTTGAAGACCGTACTTTGAACTATA
AGGGTTTTTCTTTAAAAAATTGTAATTGGATGGAGAGTTTTCTCATTGGCACTCATACAA
CATCTTCTTATATCTATGTGACAAGTTAATTAGAATAAAACAAAAACATGTATGAAATTT
GTAGCGATTTCATATAGCAAATTTATTCCTTGTGTTCTTTAAATTTGGTTAAATAAATAA
TGAAGGATAAAAACCAAACAGTACCAAAATGACTATACCTATGA
>contig_123 Average coverage: 2,49
TAATGAAATTGACAACTTTGTGAAAAGTGGAAGACACTAGAAAGGGATTTTTGTTTAAAA
AAGAGAAATATTATCTTTTAATCATTAGAGAAACAGATTATTACAAAGTAACGCGTGGAT
TATCGGATTTATCCAATCTCAATAGTTAAATTATAAATTTTAAAGTCCTTGACGAGGGTA
AATTTAACTATCTCGGTTGGATAAATCTGATAATCCAC
>contig_124 Average coverage: 8,54
GTCAAACTGCTATATAACCAGTGTAATTTTTCTGATAAAATGGTTGGTTCAAATTTTTTG
AAATTTTTATATTTTTGTCAAAGGGTCAAAGTAAATACTTTGTCAAAATTTTATGAAAAT
TAAACGAGCCAAATTAATTTTAGTGAAAGTGTTGGGTACCACCTTAAACATTCGAAATTT
AGTGTTAGTATCCTCGTAATTGGTATACAATACTAATAATATCTTAGAAAGATACAAGCG
TATATAATAATATGCAAAGTAAAAAAAAACAAATACTTTGTGAGAACAGGATAAACAAGA
ATGTGTTCACAGTTCACGGATGCCC
>contig_125 Average coverage: 149,35
ACTAATGGCCTAATTAATGTACAAAAAAATGAACGAAAAACAAATACTGTAACACAGCAA
CAAACGACAACCACTGAATTACAGGCGCCTGACTTGGGACAGGCGCAAAAATGCGGCTAG
ACCACCGAAAGCTTTATTTTTATGAAGCCCAGGTGGTCGTGTGGTCTAGCGGGACGGCTA
CAGTGCAGGCGATTTGGTGTCACGATATCTCAGTAGCATGGGTTCGAATCCCGGCGAGGG
AAGAACAAAAAATTTGCGAAAGCAAATTTACAGATCTAACATTGTTGGGTTGATGTTTAG
ACGAGTTGTATATACATAATGTACACAGCCATGTATCACCATCATTGCTGGTGATCCGAT
GGATAAATCTGTTGTAGAGTTGTCACTGACTCAGACGTACTTATAAATATAATTATTTTC
TGTGACTGTATCTTACATTAATTTGTAGGATCCTTTACTATAGATAATTTAGCTGATCTG
TAACAATAACATCTTCATGCCTTATATATCATGTACTGTAGTACGACGCTAGATTAAAAC
TGACGTGGAAAGGTAACACACGGCCACCGAAAGCTTCATTTTTATGAAGCCCAGGTGGTC
GTGTGGTCTAGCGGGACGGCTACAGTGCAGGCGATTTGGTGTCACGATATCTCAGTAGCA
TGGGTTCGAATCCCGGCGAGGGAAGAACAAAAAATTTGCGAAAGCAAATTTACAGATCTA
GTCGTGACTG
>contig_126 Average coverage: 5,34
AAGGAATTTATTGGTGTATTACCTCGACCAAGTCACTCAAAATCACTTAAAAATTACAAA
GACTTTAATAATATGTTAGTGAGTGACTTGGTCCAGTTTATACACCAATAAATTCCCTTT
GAAAGGCGTTTAATCCTTATAATTCATTTATACTGTAGATAGTAAAGTTATATATATATA
TCCGATGGATACATCTGTTGTTGAGTTGTCACTGACTCAGACGTACTTATATATATACAC
CTTGTGTTTGTGGCGTAACATCTTGGCCACAATTTTA
>contig_127 Average coverage: 1,87
GTGTCGTAGTTCTCCTCTTATAGTTCATGTGTTCCCTTAGTTTTTGACCTTTGAACAGCG
ATATACTTCTGTTGCATTTATTTAGATTATTTGAAATTTTGCAGAGAAAAAAAACCTATT
GAAAATGAGGTATACATTCCTTGATTGAATGTCCTCAATATAACACAATTAAATGTAATT
ATAAAATAAATGATATTAATTCAAATAATTTGGATGAAAATTTTACCAAAATGTTAAATC
CTATGTCTTATATATGTGTTTGTGTGTTTTAAGTAAAATTATGAAAAACTACAATAATCA
TGCTGTATATGTGTATGATGGTTTTACTGTGAGTTTTGAATGTTATGGTGTCCATATAAT
TTACTTATTACTTGTTGTTTTATGGAGCTATATTTTGATGTTTAAATATATCATTGTCTG
TATTTGGAACATGCCTCTATTGTGCTCTTTTTAATAAATATTCAATTCAATTGAAAAAAG
AATATCAATGGAATATTCAATATCACAAGTCGAAAATAAATAAACGAAGCCATTAATGGC
ACAAAAACATCCCAAAACGACGAAACACAAACAGTACCTAGACAAACAAATAAACAAAGC
AATGGCACAAAAACATCCCAAAACGACGAAACACAAAGAGTACCCAGACAAACAAATAAA
CAAAGCAATGGCACAATAACACCCCAAAAATTTAGAAATAGTGTACTCCCTGGCGAATCG
ACTTTTTCCTTCCCATTTGGTTTATCAGTTGATCAACATTTGTATTATCTTTTGGGGTTA
GGAATTTTTTGTCTTCTTTCATCACTGAAGATATGTTGATTATCCAAATGCGCATCTA
>contig_128 Average coverage: 29,82
TTTATCCCGTCCTATGACATGATACATGCATCTACATTTGCCATTCTTTTTTATAAAATA
TTATAATTGTCTGTATTTGGATCACGCCTCTATTGTGCTCTTTCCAATAAAATATTGAAA
TTGAAATTGAAATTGAATAAAACAAAGCAGTACCAATTTTTCTTTAAATTTCTTTTAGTT
TAAAATGGGGAATATATGTGTAAAGTTTTAAAAAAGTCAAAGGTTTTAATACTAATCTAA
AGAGTCTTAGATTGTATGTACTCTAAAATCTGGATTTTTTTAGTATACATATCTGATTCA
CGCCATCTCTAGAATAGGAAGGGTTTAAATAACTTTGAAGCCGGGCTTTGGTTATTGATA
AAAATTGATGTTAATAATTCAAAACAGCGTTTGTTGATCACTTGGAAGACCTATTAAAAT
GCCGTTGTTTGTAAGGACACTTCTGTAGTTTAGGTATCCAATACAGTGATGGAAGATCCA
TTTCTTCATCTTTGGTTGAAATTCTAAAGGAACATACCTATGATTATCCAGGATTTCCTC
TTTAGAAACAGTCGTGAGGGTAAATGCTGAGTTTCCAAGTTAATTGTCAATAAATAAATT
CATTTATTAAGTAGTTTTTGTAATGATATTTAAATACAACAAGAGTGCACACGCTGAAAT
GTCTCGCCTTCTATAC
>contig_129 Average coverage: 4,03
TTGCTGCAAGCTTGCGGCAATGTTTTCTGCAAACTTGCGGCGAATGTTTGCCGCAGGGCT
TATTTTTCGGTAAGGGTACCATTCATGTTTGTGGTAAATAAGGAAAACAAGGTTCAATCA
ATGTTTTTGTTATTTCTGTATAATTAAAAAAACGCCACTGTATAGTATGCTGCTTAACTG
TTGATAGTTTGACTGCCAATAACATATTGAGTTTTGTATCTCAATTCTAGCAATACAAGC
TTAGATACCTGTGGAGTTTCTTTCGAATTTTGACATTGAGAATTGCGCTGTCAAAACATT
GTCTTCAGTGTATTGGAAGTAGAAGTCAACTGTTCCACCAAAGGGTTCGTGAAATTCTCC
AGGCAAAGACGACGGGTCTTTACAGTCTGTTTCCGATACATAAAATGATATTCTGTAGCC
ACCAGCCATATGCATCATGACGTCTTGGAAACCAAACAGTTCAACCCTTAAATATATTAT
AAGTAGTATTGTCACAAGAATACTAAGTATCCTTGCTAAACAGCCAAGGCAATTCCAGTC
TGGATAATAAACCGACAACAAGCCTTATAGAAGATACTACATGTGTAAGTACAGTATACC
CTATTTTGCCAATTTTACATGAATTTTATGTCTGTGTTGTTCACGTATCGTTGTAAATAT
GACGGAACTTGATGTGACTGTAATACAAGATAGAGGTTTAGCGCTATAAAACCAGGTTCA
ATCCATCATTTTCT
>contig_130 Average coverage: 8,18
AGTAAAATATAAGGAACAAATCTAAAACTAGACAACTTAGGAAGATAATGATCAAATTTA
ATTTCAATTCCAATAGTGGTTGTAAAGAAGCTTTTTCATTTCTCCTTCAATGACTAAACA
CTGAAAAATCTATAACTATTATTTTTCTTAAAACATAAAAACTTGGTTTCAAACTTCATA
TAGAGGTATGTAAAGAACTATTTTAAACAAATGTTATTAATTCATCTACAAAACAGTTGC
ACACAAAAAGAAATAAAATCAAAAAATTTCTATCATCAACTCAGTAACATTTATTAAAAC
TAACAAGGGTAATTCTGAACCAATATGTGCATACTTTATATTGACATATCTCATTTTGCA
TTTTTACCTTGTTGGAAGTGGTGCAGGTGCAACAGGAGATCTTCTTCCTCCTGAGGCTCC
ATAATACTCTGGAGGGGGTCTTGCGTAAGGGTCTCTTTCTCTCATAAATGGATCCCGTGG
ATCTCTTGCAGGTGGCAGAGGTCGTCTGTCGTAAGGATCTGGATATGGTCTGTATCTATC
AAATCTGTCCATTGGTGGTGGAGGAAGGTATCGGTCTCTGTAGTAGGCATCATAGGGGTC
TCTAGGGTACGGATCCCTGGGATACATGTCTCTCATTGGGGCTCCCCCTTTAGGTCTTGA
TCTGTCGTTAGAAATCCTATACGCAATCATGAAATAGCCAATTCTTTAATTCAATCTTTT
TTAAACACTATTAAATTAATTATATCGTTATAAATTTGTTGGTGGCTAAAGTGTGTAGTG
TCTTGAAATTCTATTAAACTGAGTGTGCAAAAAGTATAAAATTTTAAAAATCTGTAAATT
GAAATAAAATAATGACATGAATTCCGATCGACATAAATAAAACAAGTTTCACAAGCGTTA
AGGTAAAATTCGAAGCAGATAATACAAATTACACCAGATTGACACTCTTCACATTATTGC
CATGGTGTG
>contig_131 Average coverage: 374,02
AACAGACATCTGTAGATGCACTCTTTGACTTTGAAATTTCAAAATGGCTGCCGCTCACCT
GGCAATAGGGGAAGGGTGCCATCCGCTATTGCTTGCAATGGCAAATCTAGTTATTATTTT
TTATTCTTCCACACATTTTGTCCATACTATTTCTCAGAATTGGTCAGACCAATGTTGATG
GAACTGTACCATAATATGAACCGCCATGTTAAGTTGTGCAAGAGACATTGGAATGGTAAA
AAATGGCCGCCGTTACCATGGAAACAGAACAAATGTGAAAAAATCCAGTTTTTTGTTTTG
GTGAACTGTTTGGATATGCTTTAACTCAGAATCATTATATTTTAATACAATGTAGGTGCC
CACTATATACAGGTGTTGGATGATTTTGGCGATCATTGGAACTACTATGTTGCCATGGAA
ACTACACCAAAAATTTCAAAATTCTCAAAATGCTCAAAACTTCATGAAACTTCACAGTAA
TGATGAGCAACATTGGAGTTGGAATTTCCAAAATAGGTCTTGTTACCATGGAAACAATGC
AAAAAGGTCAAAAATTTCAAAAATAAGAATTTTCCGCAAACTGGATGAAACTTTACAGGA
ATGGTAACTGGCATAGGCAGAGTTGGATTTTGAAGTTAGAATTTTCAAAATGGCCGCCGT
AACCATGGAAACAGCAAAAATATCAAAAATTCAAAATGTTCAAACTTAATGAAACTTTGC
AAAAATGTTACTAGACATCTGTAGATGCTCTCTTTGACTTTGGAATTGTCAAAATGGCTG
CCGCTCACCTGGTAATAGGGGGAAGGGTGCCTTCCGTTATTGCTAGCAATTACAAATCTA
GTTGTTAATAGTCTTACATATGGTAATAGTT
>contig_133 Average coverage: 336,35
GCAAACTGGATGAAACTTTACAGAAATGGTCACTGGCATGCGCAGAGTTGACTTTTGAAG
TTGGAATTTTCAAAATGGCCGCCGTAACCATGGAAACAGCAAAAATTTCAAAAATTTCAA
AATGCTCCAAACGAGATGAAATTTTACAACAATGTTAATAAACATGTGTAAAAGCACTCT
TTGACTTTGAAATTTTCAAAATGGCTGCCGCTCGCCTGGCAATGGGGGAAGGGTGCCATC
CGCTATTGCTAGCAATGGCAAATCTAGTTATTATTATTATTATTATTTTTCTTCCACCTA
ATTTTGTCCGCTCGCTTTCTCAGAGCCAAAGGAACCAATCTGAATGATGGTGCACTATAA
CAAGGAACCCTGACTTTCCTGTTGCTTTTCAATATTGGCACTAAAAAAATGGCTGCCATC
ACCATGGAAACGGAAAAATGGTGAAAAAATATAATTTTGGAGTTAGGTGAATTGTTTGAG
AATGCTTAACCTTAAAATCTTTAGATTTTAATACAATGTAGGTGCCCACTATATACTGCT
TTGGGATGATTTTGGCAATCATTGGAACTGCTATGTTGCCATGGATACTACACCAAAAAT
TTCAAAAAAATGAAAATGCTCCAAATTTTTTGAAATTCTAGCATAACGATGAGCAACTTT
GGTAGATGTGGAATTTGGCGTTGGAATTTCCAAAATGTCTGCCGTTTCCATGGAAACAAT
GCAAAAAGGTCAAAATGCTCCAAAAACTTCCGGGTTTGGTGAATAACTTTGGTATGCTTG
AACTTAAAATCATCAAATTTTA
>contig_134 Average coverage: 3,49
GTTGTATAAAGCTGTGCCCTGCAGAGCATCTGGTTCCATTTGTCAACTTGTTCTCGCATT
TTAATCAGGCATTCCCGATTCTTTCGATACACTCGGGCTTTTATCACGTTTACGTACGTA
CAATATATATGGTAAAAGTAGAGCGGGAAAAGGTTCTTTCATGAAATATTCATGAATGAA
AACGCAGTCTTGCGTAAATTTCTTGTGATTTTCTCTTCTCATCGCATGGCAGATCCGCGA
AGTAATGTTTTTGATACTCATTTTCAAAATGAAGTAAAATTCATCTGAATCGTCGGTGAA
CATTCATTTCTTTTTTATTCAAGCTGTAATCTTTTCAGTCAAAAAAGTAGTTACTCAAAA
TTTCAAAAGAATCTTCCAAGAATCAGAATTCAAACACTAGT
>contig_135 Average coverage: 2,01
TTTTAAAATGTTTTACTTGTGGAAATTAACTACGATGAACTAAATTTGCCACCATAACTT
GTTTATGATATAGTGGTCAAATTCATGTCCAATCTGGAAAATCAATAAATATGTAAGACC
CGGGTGTGTATTTCATGGATCTGTTATATTTAAACATGTTAACGATGCAAAACATTCAAT
CTTTATCTGTGTCAATAGTTCATTGACTAATTAATTTGTCTGTCTTCTACTTTATCTTTG
TCAATAGTTCATTGACTAATTAATTTGTCAGTCGTC
>contig_136 Average coverage: 5,75
AGAATGATGATCTTAATCAGTACCTTATCAAACAGTACTTACTGTAAACGTCTTGGTAGA
CACGGCACATCAAAGTCTAAGAAATAACACTTTGGTCTGATAAAATTAAATACATCAGCC
ATAACATTACCTCATCAAAGAAACTATTACCGTTAACATTATTTGTTTTGTGTTTATCTC
CATATTACTTAAATAGTTTCTTATTATTTTCTCTTCACCGTTAGCGTGTTTTATGCCATA
CAAATTATTTACTATGATTCTCATCCGGGCATTTATTGTCTTCATGGTATAAATAAACGT
TGTCCGACTAAGGTTTCAAAATACCATATTATATCATATTATTA
>contig_137 Average coverage: 9,95
CGTTTTTTGATGCAAGGAAAGTGATGTCCTTTAAAGAGCATTGAGCAAAAATAAAAAAGA
AAGGTCTTCTGACTTACCTATGGTCATTGAGCCAGTAAAGAAGGTTCTTGAAGCATAGCA
ACGACCATTGAGCCAAAAAATTGAGGTCAACTTAACAACTTAACAATTCAAACAGTGCTA
AAAAATTAGGTCATAAAACTTTAAAATGACAAGAGGAATCCATGTTCAATGAACTGGAGA
AGTAAGGTAAAATAGTCCAACAGAAATATAAAGGTATCCTTTGAGTTAAATTAAGGAAAA
TGTGTTTCTGATAATAACAACAAATACATCAATGGTAAACAAATGTAGGAAAATTACAAA
AAAAGTATGATGCAGTAAATAAACAAGATCAATATTTGTTTGGTCTGCCATTTACTGAAC
TATGAAGATACTATTCATATTTAGTTTTTGCACAGAATGTTTACAGCAGTACACATTTTA
TTACTTTTTATACATTGTCATGGTTGGTCTTCACTATAACGTACTACAGCTGTTCACCAC
AATATCCGATTTGTTTTTCCACATTGTACCATACGAAGTTTATTATTCAAGGCACAGGGG
CATTAGCTTTCCTTAAAGCAAGGCAACCACTAACTAGATCACTGGGCATCATGCTTATTC
TAGAATATTCTTCAGCAGTAGCATATCTCAGTTTTGTTTGTGGATCTGTGTAGCTTGCCT
GAAAACATAAGACAAAATAGATATAAAATTGACTAATAAACTGCTGTCAAAGAAAGGATA
TGTTTCAGGGGGTGGTATAAAAACAGTAAATCACAAAATAAAGAAAATGTGGTATGAAGA
AGTATTAATCAACAATGAGCCAAAAACATGTGGTATAAACTATCCTTCCAAAGATGAGAA
GGTTAAAGCTTTTGTGGTGTGAAAAATCCATCATAAAAATCTAAAAGGTAAAAGCTTTTG
TGGAATGAATTATCCATCATAAGAAGAGAAGGTT
>contig_138 Average coverage: 6,66
TAAAGTACGAAGTTGAAAACATTTGGAACCAAATATTCTAAAAGCAAATGCAAAATGCAG
CTAAGGTAATCAACTCCTGATTAAAAACCCATGTACATGTATTTCAAAAAGGTAAATAAA
CTCATCATAGATACCAGGACTAAATTTAGTATACACCAGACGCGCGTTTCGTCTACAAAA
GACTCATCAGTGACGCTCAAATCCAAAAAAGTTAAAAAGCCAAACAAAGTACAAAGTTGA
AGAGCATTGAGGACCAAACCGGGTTTAATCCACCATTGCACTAGAAAATGTTTGTACCAA
GTTAGGAATATAACAGTTGTTATCCATGATTTTAATGGGTTTGAGCGTTTGATTTTGCCA
TTTGATTAAGGACGTTCCTTTTTGGATATTCTTAGGAGTTCAATATTTTTGTGATATAAA
TTTTATATCTTACTTATGAGTTTTATTCATTGTTGTACACCGTACAGTGATATTTAGTTG
TTGTTACGTTTTATATCATAATTATGGTTTTTGTTGGAGATTTTTCTCACTGGCAATCAT
ACCACATATTTTGCTTTTCACATTTATTGCTTTTCAACAGTGTGATCCCTACAGGTGGAA
CGGTAGTATTTTTCTCGGCAAAAGAGATAATGATAACATTTTCATTACTTTCTTATGCTG
ACCCATAATAAACATATAAGTTAATTTGCCAACAAACAAAATTCATGCTGTAGCTGAATC
AAAATATATATTAAAAATGTAACACAATGATAAATAGCAGAAAACTACACATATGATACA
ATGTTAAGTAATATGACATCTCATTTTCCATGTCCTTCTAATGTTCTACAATTCATAATG
TAACGATGTTCGTCTACAATATCACAGAGACGACAGACTCTTCTATTCTTGGTTCACAAT
AATCATGAATCAATTAACCCTGCAGAATTCATGTTTATGGCGTCGAGGGTGGAGTGTAGT
CCGGGATTGGATCTATGTTATTTGTCAGCCTTAAATGTTGTAATTGGGGATGTAAGTCGT
TCATCTGGTTAATCCTCGGTATTTGAAAATTATTTACTGCCGATGTAGTTGTAGCTGAAT
AAGTTTCATCGCTTTCTTCTGAAAATATACAATAATATAATCATTTTAATTCATCTCGGA
TCGATTAAATTCCTCTTAAGATTCTGATACTGGAGCGATTCTCCTCTGATTTGGCCTCAC
AATTTCATCTATCTTACCTCGAACTGGTGCATTTTCCAGCATAATTTCGTACACCAAAAG
CAAGTACGAATTGGAGATATATTAATCTTTTAGAAACATTTAAATTATGTTTTCGCTTCA
GTAACGGCCATACTGTATTGTTTTTTTCTCTTTCTCTTTGAATTTTAATTGTTCTCTAAT
TTGAATACGACAACCTCACGAAATTCAGTTTGTTGTAAAACTGACAGAAAAGTTCTGTCC
TTCCTAAAAACTCATCAAAGTTACCAGGCTAATAATTTTGTACTGTAGACGTGCATTTTG
ATACGCTTAAAATGTCGATAAACTCTTATTTGCTACATTCGGAGTTTATCCGATTTACTT
AGGCGAATTGTTTCTATTCTATAAATAGGTTTACGAGTAAATCTGTTGCTTTATATTTAG
TAACAACGATCGTAAATATAATTTATTGCTTGTTTACACTAAGTGTAATGATTTTTATTA
TTTTCAACATTAACTTTTATTTAGACTTAAAACATTAAAATACACTCGCATTTTCTTTCT
TTTATAGTATAGCCTTAATACCTGGTATACTTGTCTGTCTGATATTGTGCTTTTCCCTAT
CAACAGGACATTTAATGGACTTATATCTACGTTTGTGTGCCATAATTCTGACACATGCAG
TACAAAGTATGTGTCCGCAAGGCAAAATGACTGGCTCGTGTTCTCCGTCGTCATATTGTT
CTAAGCATATCAAACACACGTCACTGTCAATATATACAGTAGCGTTCTCATTTTCGTTTT
TAAACGTACAGTACTGACGGAGGTTGCCCTACAGAGTGTCCACTTCTTATAGTACTTTCT
GTATAACTTGAATCATTGCTGATCTGTTCACGATCAAAAATGTCAGACACAGCATATATA
GAATCATTGTCATAATGACGACATTTCCTTATACAATTTCCCATAAACGGATTTCAAACA
ATCTGTAAAAATAAATATTTTGTATTAATTTTCTTGAAAGATTATGTAATATGAATTGAA
CAATCTTATTCAACACAAGTTGCATGAGTAATGCGAGATTGAAAAAGGTTATTAAACAGG
AAAGGAAGGTCTCTTGATGTGTTAGGAAATCGGTTTCATTCAAACATTTCTCCAAAGTTC
CTGTACCAAGTCAAGATAAGGACAGTCAATGTGTAATTCAATGATAATCTTCAAAATAAA
TTTTCAAAATGCGGTCAGTACAATACAGATGCATGTGATACAAGTGATTAGCAACTCGAG
TTAATTTAAGAAACGGCTAATGAAATATTTTGGCCATCGGAAACCGATTTGGATGAAGAT
GGGTTTGTGACGAAAAAATCGGCCATTGTGGTGAATAAGACACTACGCATGACAATTATT
AATATTGTTTACATCAGGTTTAGTTTGTAACCCGGATGTGGTTTTTCTCTCAATCGATTT
ATAAATTTCGAACTAGCGTAATATAGTATTGTTAAAATTTAGAATGGAAGTGGAGGATGA
GTCAAAAGAGACAACAACCCGACCATAAAACAGACAAGAAGGTCACCAATAGGTCTTCAA
TGTTGCCTTTATGTACCAAAGTATAAGCCTGTCATCTTTGATACACTTTCTTTAAATAGT
TGAACACATTAAAACCAGACATCACACATGTTACATTACATAACAGAATGTTTAAGGAAC
TAGTAAATTATCAATCGAATGTAAATTATTTGTTTACCTTTACTAG
>contig_139 Average coverage: 17,08
GGGGTGTAGGAGGGGTCCTGATCCCGAAATCCCAGGCTTATACAGGTTGGGCACAACCCA
CCAAATGGAGAACTATTATAGAATAAGTAACAATCCCTCATTTGAGTAATCATTTTATAA
TGCTGAAAACATTTTTTTTTAAATGTATGATCTCTAGTCTCTGGAATTATATGAAAGTGA
ACTAATATTGGGGTAAAAAATGTCAGCTCCCATCTTTTATGCTAATTACCTGTCTGTGAC
TACCATGTGACTTTG
>contig_140 Average coverage: 28,99
TTTGCTCATTGTTGAAGGTTGTGCTGTAACATAAAAGTTGTTAACGTCTATGTCATTTGG
TCCCTGTTATAGACTTGTCACATTGAATTGGCAATCGTACCAATCTTCTTATTTTTATAA
TTAAATTCAAATTTATAGCTTAAAGACTCATAGTACTTAACCTAATTCAAACAATATAAC
ACCCATCCTACAAATGATTCTTTTAATATTTTTAAATGACAATCCTTTTAATAACCAATG
TTCATTCTTTTATAAATAATAATTGGTAAACATGATCTTCTTTCCTGACTTGTAACTTAA
TTCTCAAGTATTCAACCATATACATGTATTGTGGACTTTAAAAGGACCTCAAAAACAGAA
AATGACAATTGAAAATACCCAAACATATTGTTTTAAATGTATGATCTCTAGTCTCTGGAA
TTATTTCAATCCGTGTCATCAATACGAATTGGTTTAATTACCTGTCTAAGACTACCATGT
GACTTTGTAGATCTGATTACTATAGAGGACTGTGATAATTACCTGTCTATGACTGTCATG
TGACTTTGTAGATCTGATTACTATAGATGACTGGGATAATTACCTGTCTATGACTTCCAT
GTGACTTTGTAGATCTGACTACTATAGATGACTGGGATAATTACCTGTCTATGACTGTCA
TGTGACTTTGTAGATCTGATTACTATAAATGACTGGGATAATTACCTGTCTATGACTGCC
ATGTGAC
>contig_141 Average coverage: 77,92
TGATTTTTATAATGAATAAAGGATATCCCTGTGTAGGTCGGCATTCCAACAATGACGTCA
CTAGGTTAGATATATTTAGAATATTTCGTAATACTGATTTTTCCGGACTGTAAAAGAAAC
GTATATAGTGTAAGGGAAAGCTCAATATACGATAATTTCACGAGATACGGAAGGGAAATT
TGTAAAAAATGTATTTAAAGTCAATCTGTTCTCCTTGTCATCAATTTCAGTATGACATTT
TGAGGGGGTTTCCAAACTATCAAAACAAAATGATTGACGTGAGGGAATGATACTCTGGCC
AACCCCATTAGGGAATTGACGGCTTGAAGCCGTCTTTCCCCAAAAATCAAGCATCTAAAC
AGTTTCATAATTGTTTCAACAACACCTAAGGTGATATCAAGCTCCCTGTCCAGAAATTTG
TCTACCAAAAGTTACTTAAATTTTTTTTTTTAAATAAAATAGACGAATGTTGACAAGTCG
TCAAACTTAAATTATCTTAAATTGCCTCTGTTTGTATAGAATATCTACACATGAGATGTC
CCAAGTCAGGAGC
>contig_142 Average coverage: 1,97
GACCCCTCAAAGAGTTGTTGCAAGTGTTCTTACTTTTTAAAGAGCGCAGCACTCTCTTTA
TTCGAGGCATCGGATTAAATGTCCTTATTCTGACTGGACGTAGATGCAAACTTGATACAT
TCCCGCACAGCAAAATGAACGCCCCACTTTGGAAGCATTTTACTGCCAGTCGGAAGAAGA
CTTAGTGACCATATTTCTATTCCCTAGTCGACCTTGTAAATTGTAGAATAAAACCTAAAT
ACAAAAGTTATGTACATCGTCAGAAATATAAAATGTATTTGTACGTTCCAATCTTTCCAA
AAACGTACTTTCTTGTCCCAGCCACTCTAAAAAAAAGTGTGATTGATCTTTACAAGTATT
TTTTGTGCAGTCAGTACATTGAATTTAGATTTAACATTTTTTAAGCAAAGAAAAAGTCTA
TTTTTTAGAGGGATTGATAAGATATTGATTCCCGAATGGTCCAAAACACCAAAATGGCAT
GTCCCTTGACCGCCTGTTCAACATTCATACATCTTCTGACATCAGACTCGGACTTCTCTT
GAGCTGAATTTAAATGTGTGTATTGTTATGCGTTTACTTTTCTGCATTGGCTAGAGGTAT
TAGGGCAGAGGTGAGATCTAAAAAACATGTTTAACCCCGCCTCATTTTTGCGCCTGTCCC
AAGTCAGGAGCCTCTGGCCTTTGTTAGTTCTTGTATGATTTTAAATTTTAGTTTCTTGTA
TACAATT
>contig_143 Average coverage: 17,98
TTTGTGCAAATGTTGGTGGTGGGGCCCCGAGGTACCAACAATACTTAGAAATTCCGAAAT
GGCTGCCATTGCCATGGAAACGGAAAAATGGTGAAAAAATATAATTTTGGAGTTCGGTGA
ATTATTTGAGAATGCTTAAGCTTAAAATCTTTAGATTTTAATACAATGTAGGTGCCCACT
ATATACTGGTTTTGGATGATTTTGGCACATTTTGGAACTGCTATGTTGCCA
>contig_144 Average coverage: 7,01
CATATTTCTATTCCCTAGTACCCAGGGTTAGTGCCAAAAGTGAGAACCCACAGACACAGT
CAGAGTGACCAGAGTCACATGACAAGTGTAAAGCAAACATAAATAATCCACATGTCTCAA
CAATAAAAAGGATCAGGATCAAGTCTTAGATTGGGGTTTATTCATTTGGTCCCAGTCTTA
TGGGGTTACAAGGTTTCCCCTCATATTAAATTTTGGCAACAAATGAACATCGCATATATA
GTCGAAAGCATTTATAAAAATCCGGATTTCTGGGACATCAATTTTTACCTCAAATAGCTA
TATTTTAAACACAAACATAATTTATACATATAAAACGCTGGTTATTCATGCAATACCTGG
TTCTAAGATCATCAGCCATTGTCAAAAATTGAAATTTGTGTCGTTTTAAAAATCGATAGC
GTGTAACATCAGTTATCAGCTCATATTGGACAGAAACAGTTATTATTTTGTCGGTCTAAT
CCTTATTTTGATCAATCAGCATTCCGCGTGAGCCCAATTTACACGCAGACCGAAATATAT
ATTAAAATTTCATGTCCCACAACGTACAAGATAAAAGTTCAAAACTTATAAATCTAGGTA
ACAGAGAAGGAACATGATCCTACTAATTTTTCAGTGTCAAAAAGTAATTTTTATACAAGT
GTGTTCTTATTTTACTCAGGGGACTTTCTATACTA
>contig_145 Average coverage: 612,59
TCCAATGGACCAAAGTTGATGGAACTCTATTATATAGAGGACCCTTAGGTGAAGAGTTGC
AGGCACCATGGAATGGTTCAAGATGGCTGCCGTTACCATGGAAACGGAACAAATGTGAAA
AAATCCAGTTTTTTGTTTTGGTGAACTGTTTGGATATGCTTTAACTCAGAATCATTATAT
TTTAATACAATGTAGGTGCCCACTATATACAGGTGTTGGATGATTTTGGCACTCATTGGA
ACTACTATGTTGCCATGGAAACTACACCAAAAATTTCAAAAATATCAAAATGCTCCAAAC
TTCATGAAACTTCACAGTAACGATGAGCAACATTGGAAGATGTGGCATTTGGAGTTGGAA
TTTCCAAAATGTCTGTTGTTACCATGGAAACAATGCAAAAAGGTCAAAAAATTCAAAAAT
AAATAAAAATGCTGCAAACTGGATGAAACTTTACAGAAATGGTCACTGGCATAAGCAGAG
TTGACTTTTGAAGTTGGAATTTTCAAAATGGCCGCCGTAACCATGGAAACAGCAAAAATG
TCAAAAATTTCAAAATGCTCCAAACTTAATGAAACTTTACAAAAATGATAATTTGAATGT
GTAGATGCACTCTTTGACTTTGGAATTTTCTAGATTGCTGCCGCTCGCCTGGCAATGTGG
GAAGGGTGCCATCCGCTATTGCTTGCAATGGCAAATCTAGTTATTATTATTTTTCTTCCA
CCCATTTTGTCCAGCTTATTCTCGG
>contig_146 Average coverage: 330,98
TATCTGTTGTTACCATGGAAACAATGCAAAAAGGTCAAAACTTTGAATTTTCACAGAACA
TTCCAGAACATCAATGTTAAATTTATTCTAGAGACATTAAATGGTATATGATGGTATATA
TGATTATGGAGGGAAAAAATTGCAGCGGGGGTTTGACTTTGGAATATTCAAAATGGCCGC
CGTTACCATGGGAACAGCAAAATTATGAAAAACTTCAAAATGCTTTAAATTTAATGAAAC
TTATAACAAATTTTGCCTAGCTTATGTAGACTTAACTTTTGAGTTTCGAATTTTCAAAAT
GGCCGCCGTTGCCATGGAAACAGCAAAAATTTTCTAAATGGCTGCCGCTGGCCTGGCAAT
GGGGAAAGGGTGCCATCCGCTATTGCTTGCAATGGCAAATCTAGTTATTATTATTATTCT
TCCACACATTTTGTCCAGGCTATTTCTCGGAATTGAATGGACCAATGTTGATGGAACTAT
ACCATAATATGAACCCCC
>contig_147 Average coverage: 5,05
CTTTTGAGAGCCCTATTAACATGCCAATGGTAGGATTTGAATCTTGTATAAATGACTAAG
GCTCATTTGAGGGGTGGTCGGAGGGGCCCTGATCCCGAAATCCCGGGCTTGAAAACATGA
AATCTGACAATGCCCGAGTGATTTACCTGCATCATTGTGTTGCACATTGGAATCCCCTGC
ACATAACAGCACCAATGATATCAAAATCAAAACAGTATTGATAAAGACAATGTTTAGAAT
TACTTTACAACAAAGGAAAGATTATGCTCTAATGATTAACTTACAATTGTACGTCATTAC
AGCTTCAACTTTCAGTTTCACTTGAACATTCTGAAGATTTCTTGAACTTTTGTATTTTAG
ATAGATGTACATATATTCATCTTGTTCTCCACAATATTTCGTTGTTGGTTTGTCATAACA
AATATATTTCTAATAAAAACAAAAACAAAACATGAAAAACATAAAAAAAAATCCAAACGA
GGAAATCTTTGTAAACAAAGTAAGCATACGCATAAATTTAATTTACATGCCACTTAAAAA
AACAAAAAACATAAAACTGGGTATAAAATGATGCTTGATTGAACAAATGAAGAGTTCGGT
CATAGAAACAAGCAAATCGGAAATATGCGTCTGAATTTAGGCCAATAATGTTGAATATTC
AATTTTAATAGCAAATATGTATTTTCCCTCAGTGGGCCATGAACTCTGTCCAGTGTTCAA
GACATCTTAGCAAACATTG
>contig_148 Average coverage: 19,79
TGTCAACTATTTAATTTTAGATTTAAAAAGTTTGAAGAAGAAATCTTTAATTGATTTGTA
AAATCTTGACATTTGTTTTGTGTAAAAAAACCCATGTAATGTCAAAAATTTGATCACAAT
CCAAATTCAGAGCTGTATCACGCTTGAATGTTTTGTCCATACTTGCCCCAACTGTTCAGG
GTTCGACCTCTGCGGTCGTATAAAGCTGCGCCCTGCGGAGCACCTGGTTTAGATATGCTT
TTTATTAGGATGAGACTTAAGACAACCACTGAAACCCTGGCTTAAAACAGGCACACGAAT
ATGTGGCAGGGTAAACTATTTTTTTTCTTCAAAATTTCACAAAATTCCAAATTTTTTTAA
AGTTTGAAGAAGAAATCTGCAATTGCACAATATTGAGCAATATATTAGTAAGATCTTGAC
TTTGTTTTGTGTCAGAAACTCATATTATGTCAATTTTGTTTTATCACAATCCAAACGCAG
AGCCATAAATGCCCCAACTGTTCAGGGTTCAACCTCTGCGGTCGTATAAAGCTCCGCCCT
TCGGAGCACCTGGTT
>contig_149 Average coverage: 340,81
ACTATTCCTGTAAAGTTTCATCCAGTTTGCAGCACTTTATTTTTTTTGGAAATTTTGAAC
ATTTGTGCTGCAACCATGGTTACAGTAGATAATTCCAAAATTCTAAAAGCAGACATCTCA
TTGCCACATGTCATGTTATATATCAATACAGTTTCATTTACTTTGGTGCACTACTCTCTG
AGAAAATGCTGATTTTATGCATTTTTCCATAGGGTCAATGCAAAACTTGGCCCCAGTTTC
CATGACAACGGCGGCCATTTTGAACTATCCAAATATTGTCTTGACATCTTGGCATACTGG
AGAACATTTTCATAAAGTTTCATCCAGTTGGATCTTATAACGAAAGAGTTAGAATTTTTG
ATATTTTAGCTGTTTCCATGGTAACGGCAGCCATTTTGAAAATTCCAAAGTCAAACTGGA
AATCAGCACATGCCAGTTAACATTCCTGTGGAGTTTCTTCCA
>contig_150 Average coverage: 32,24
TCACTATTTACGTTTTCATGAAAATTGGCACACATAATCTTCTTACGTAATCAAACCAAA
TGGCATTTTAAAAAAGAGGGGTCCATGAACTCGTTTTCAAGTTAAATAAGTTTGAATGAT
AAAAATCAGTCGAAAACTGAATCTTTTCCCGATAAGTCATAGTTTGACGTCGCGAAAATA
ACAATTTACGTTAGCAACGTCATTACCTCCCCTGTAACTGTATCGTATGCCCTTAAGTAA
ATAGTTATCAAAGGTACCAGGATTATAATTTAGTACGCCAGACGCGCGTTTCGTCTACAT
AAGACTCATCAGTGACGCTCAAATCAAAATATTTATAAAGCCAAACAAGTACAAAGTTGA
AGAGCATTGAGGATCCAAAATTCCAAAAAGTTGTGCAAAATACTGGCATTCACAATTTAA
CCAATCATACGCTTAAACATGTTAAAAAAGATGCTAATATTTTAAGCTTAATTATTGGTA
TGTATGTAAAAATGTATAATAATCTTGCTTAATTTTTTTCTATATAACGTATGTTGGTCA
AATGATGAATTTCATTTTGTAAATTTATAAAAGTTAATATAATGCAAAATAATCGGAAAT
AACATACTTACATTGGAGTGTAATCCAAATCGTTAATACTTTTAGCAACTTGGTTAGACC
CGAAAGGATTTGTCACCCTTCTGCAATGAAGACAGGCGCACATTTTACCGGGATGGAGTA
CTCGGCATAGATAATGTGTGCAACCACCAGCCCCACAAAACTTACCACACCAGTATGATG
TGCAAGCATGCGAATGAGCCTCCGTACCTTCAATATACAAAATAAAATGTAAATAAGATC
GATTTATTTTGAATAATTTTTGTGTCATCTGTACTATTATTTGTCTGTTTGTCTTTTTCA
TTTTTAGCAATGGCGTTGTCAGTTTATTTTCGATTTATGAGTTTGACTCTCCCTCTGGTA
TCTTTCGCGCCTCTTTTAATTCATTTGTCTTTGTATAGTTTCATTTTTTGGTGATATACT
TGGCTAGGCTCGATATTTATACATCCCGCCATTGTGTAAGTTTCTTTCATTTTTCACTGA
TGAACTTTGTCTATATAATGCCTTTATACTATTTTGTTTTCACTATTGAAATAGTTATTT
GTTTTTAGGAAAAGAAGATGTGGTATGATTGCCAATGAGACAACTATCCACAAAAGACCA
AAATGACACAGACATTAACAACTATAGGTCACCGTACGGCCTTCAACAATGAGCAAAGCC
CATACCGCATAGTCAGCTATAAAAGGCCCCGATAAGACAATGTAAAACAATTC
>contig_151 Average coverage: 34,46
CTACACTACAGCAAACATCATTAGGTTTACATTTAACAAATACGGATTTTAAATTAGTAT
ACAAATACTGTGACTGGTTTTTATAATGAATAAAGGATATCCCTGTGTGGCATTCCAACA
ATGACGTCACTAGGTTAGATATATTTAGAATATTTCGTAATACTGATTTTTCCGGACTGT
AAAAGAAACGTATATAGTGTAAGGGAAAGCTCAATATACGATAATTTCACGAGAAACAGA
AGGGAAATGTGTAAAAAATGTATTTAAAGTCAATCTGTTCTCCTTGTCATCAATTTCAGT
ATGACATTTTGAGGGGGTTTCCAAACTATCAAAACAAAATGATTGACGTGAGGGAATGAT
ACTCTGGCCAACCCCATTAGGGAATTGACGGCTTGAAGCCGTCTTTCCCCAAAAATCAAG
CATCTAAACAGTTTCATAATTGTTTCAACAACACCTAAGGTGATATCAAGCTCCCTGTCC
AGAAATTTGTCTACCAAAAGTTACT
>contig_152 Average coverage: 7,97
GTAAGGGAAAGCTCAATATACGATAATTTCACGAGAAACAGAAGGAAAATGTGTAAAAAA
TGTATTTCAAGTCAATCTGTTCTGACCTGTTCTCCTTGTAATCAATTTCAGTATGACATT
TTGAGGGGGTTTCCAAACTATCAAAACAAAATGATTGACGTGAGGGAATGATACTCTGGC
CAACCCCATTAGGGAATTGACGGCTTGAAGCCGTCTTTCCCCAATAAAATGAAATGTAGG
GGAAGTCCCTAGGGTCACCCTACCCCCAGTGGCGGATCCAGAAATTTTCATAAGTGGGGC
CCACTGACTGACCTAAGAGGGGCCCGCTCCAGTCACGCTTCAGTGATTCCCTATATAAGC
AACCAATTTTTT
>contig_153 Average coverage: 50,32
CTACACTACAGCAAACATCATTAGGTTTACATTTAACAAATACGGATTTTAAATTAGTAT
ACAAATACTGTGACTGGTTTTTATAATGAATAAAGGATATCCCTGTGTGGCATTCCAACA
ATGACGTCACTAGGTTAGATATATTTAGAATATTTCGTAATACTGATTTTTCCGGACTGT
AAAAGAAACGTATATAGTGTAAGGGAAAGCTCAATATACGATAATTTCACGAGAAACAGA
AGGGAAATGTGTAAAAAATGTATTTAAAGTCAATCTGTTCTCCTTGTCATCAATTTCAGT
ATGACATTTTGAGGGGGTTTCCAAACTATCAAAACAAAATGATTGACGTGAGGGAATGAT
ACTCTGGCCAACCCCATTAGGGAATTGACGGCTTGAAGCCGTCTTTCCCCAAAAACTACA
AATTGCACTTTAATTAAGTAAGAACGAGTAATATCTTTTGTTAAATATTCTTTAATAGTG
TTAAAAGTAGTATAACACCATAAAAAATCTTGTTATCGAGATTTATCAATTTGTTTTTGG
GATAGCTATACGTTGTTCTTGTATTTCTCGGGAAATTGTGGTACCGGTGTAAGTGGGATA
CAGGAATCTGATAAAACAAAGCTTGATCCGGGATCAGAACCC
>contig_154 Average coverage: 1,00
ATAATGCCCCTCTTCTATCATATGTGGGGCATAAAAACACAGGCTTGAAACATTTGTCTG
TCTGATTTCCAGTTTTGACACTTTTATGAGGTGAATTTAAATCAAACAGATTCACAAAAA
AAACCTCTTAGGTGACAATTCTTTGATCTAACTCCTTAATTCAACATATGCAGAGAAGTG
CAACAAATACCAATTTTTATGCTCCAACTACGATAGTAGAGGGGCATTATGTTTTCTGGT
CTGTGCCTCCGT
>contig_155 Average coverage: 27,65
TCTTCCCTCGCCGGGATTCGAACCCATGCTACTGTGATATCGTGACACCAAATCGCCTGC
ACTGCAGCCGTCCCGCTAGACCACACGACCACCTGGGCTCTCAAAAAAAGAGCTTTCGCT
GGCCGTGTGTTACCTTTCCTCGTCAGTTTTAATCTAGCGGCGTACTACAGTACATGATAT
ATAAGGCATGAAGATGTTATTATATATACTCTCTCTATGGCGGTAACTCTCAAATTTGTC
ATTGAATGATTGTTCTGAATGAAATGGTTGGCTACTGGATCTTCTGTTTTTTTTGTGCGT
ATTTTTGAAAAGTTCAATAGCATTCGTTGATATAGTGTATCACCCGTTTGTCCTACATAT
ATAACTTTTTCATCATTCAATGACAAATTTGAGAGTTACCGCCATAGAAAGAGTATTTGG
GACAGAAACTTACAGAAAACTAAAGAAGCCTTTTGGATAAAAAATTAAAAACTCTAGAAC
CTGAAGGACTCAACACAATGTATGAACGATGATAAATATATTTATATTGAAAAAGCGAAA
AACGCGGCAAATGACCGTCATAAAAGTTATTATAACGTAATGTATCCAAGTGATGTAATT
GTTGTTTCAATGTTGTAATTTATTCCAATGAAGAAGGCCGTAATGGCCGAAACGTATGGG
AATTTGTTTTATAGTTTTTTTATATATATATATGTATATTATGTATGTATGTATACCTTG
TTTTGGTTCCAAACAAACCAGTTTCCTGCTCTGTGTGTGAGATTATGTTCGCCACAAACC
CATTCACTGCTCTGCAAAGCTTCCTCTGCACTGATGAAGCATTTCAACTTGGAACATGAA
TATTCAATATGGAAAGGTAGTTGGTGGCTTCTTTTTGCATGAATTGTGGACTGATAGAAC
TCTGAAATTCTTTCCATGGTTAAAACCAAACATTCTTTAATTCCAGTTGCTATATCTGCG
ACAATAAGTCCAGCGGAGGTTTTATGGACTAAATAAAGAAGAATCTTGTTGCCTTCAACA
CACACAACAATATCATGTGACTTGTCAATTGATACTACAATAAACCCTGAAAAGATGAGT
TTTCTTCCTTCATACTGCTTGGCGGTCCACATGCTCAGACATGCGCTGATTAGTCGATTA
GGTAAAGCTGATGGTATAACAGTCCCTTTGAAAACAAATGCTAAGCATATAGCTCTCTCG
GGTGTACATTCTTTGTCCATGAAGCTAGTGGTATTTCTTTCTGTAACCATACAGGGAACA
AAGAATTTCTCTGCTGGTAACCGACTGCCACTATATGTATCATATCTCCGTTGCTCTGCC
AAAATATCTAAATGAATCAGGCTGTTGAATATAAACTCTTTGTATGG
>contig_156 Average coverage: 6,18
TTATCTTGGTTCCAAACCACCCTGTTTCCTGCTCTGTGTGTGAGATTATGGTCGCCACAA
ACCCATTCACTGCTCTGCAAAGCTTCCTCTTCACTGATGAAGCATTTTAATTCAGAACAT
GAATATTCAATGTGGAAAGGTGATTGGTGACTTTTTGTTGCATGAATTGTGGACTGATAG
AACTCTGAAATTCTCTCCATGGTTAAAACCAAACATTCTTTAATTCCAGTTGCTATATCT
GCGAACAATAAGTCCATCGGAGGTCTTATGGACTAAATAAAGAAGAATCTTGTTGCCTAC
AACACACACAACAATGTCATGTGACTTATCAAATGACAATACAATAAATCCTGAAAACAG
GAGTCGTCTCCCTTCATACTGCTTTGACGGTCCACATACTCAGACATGCGCTAATGAGAC
GATTCGGTAAGGCTGGTGGTATAATTGTCCCTTTGAAAACAAAAGCTAGACTGATGGCTT
TCTCTGGTGTACATTCATTGGCCATGAAACTTGTGTCATTTCTTTGAGTGAGC
>contig_157 Average coverage: 17,53
TGGACTGATAGAAATCTGAGATTCTTTCCATTGTTACAACCAGGCATTCCTTAACACCTG
TAGCTATATCAGATACGATTAACCCGGAGGAGGATCTGTGAATGATGTAAAGGAGAATCT
TGTTGCCTTCAACACATACAACAATATCATGTGACTTGTCAAATGATAACCCAATAAATC
CCGAGAACAGGAGTTGTCTCCCTTCATACTGCTTGACGGTCCACATGCTTAGACATGCAC
TGATCAGACGATTTGGTAGGGCTGGTGGTATAATAGTCCCTTTAAATAAAAATGCTAAAC
ATATAGCTCTCTCTGGTGTGCATTCTTTGTCCATGAAGCAGGTGGTGTTTCTCTCTGTAA
CCATACAGGGAACAAAGTAGTTTTCCACTGGTAACCGACTTCCTGTAGTTGTATCATATC
TCCTTTGCTCTGCCAAGATATCTAGATAAATCAGGATGTTAAATATAAACTCTTTGTATG
GTAAAATTGCACTGAAATCTTTTTGCTCCCAAATTAAGTAGAGGTCTTCCCGTCTTATGG
TCCCACATGTTGACATTCGTTTGAAGGTTTCCTGAATTCTTGTTTCCTCTGGCCAAAATA
CTTTATCTGCAAAATATAAAAAA
>contig_158 Average coverage: 11,14
TGGACTGATAGAAATCTGAAATTCTTTCCATTGTTGTAACCAAGCATTCCTTAACACCTG
TAGCTATATCTGGTACAATTAATCCTGAGGAGGTTCTGTGGATGATGTAAAGAAGAATCT
TGTTGCCTTCAACACATACAACAATATCATGTGACTTGTCAAAAGATAAACCAATAAATC
CTGAAAACAGGAGTGTTCTTCCCTCGTACTGCTTGAGGGTCCACATGCTCAGACATGCAC
TGATGAGACGATTTGGTAGGGCTGGTGGTATGATGGTTCCTTTGAAAAGAAATGCTAAAC
AAATAGCTCTCTCTGGTGTACACTCTTTGTCCATGAAGCTGGTGGTGTTTCGCTCTATAA
CCATGCAGGGAACAAAAAAGTTATTCACTGGTAACCGACTTCCTGTAATTGTATCATATC
TTCGCTGCTCTGCCAAGATGTCCAAATAAATAAGAATGTTAAATATAAACTCTTTGTATG
GCAGAATTGCACTGAAATCTTTTTGTTCCCAAATAAAATAGAGGTCCTCCCGTCTTATGG
TCCCACTTTCTGACATCCGCTTGAAAGTTTCCTGCATTCTTGTTTCTTT
>contig_159 Average coverage: 8,76
TTAGGCAAAGCTGGTGGTATGACAGTCCCTTTAAAAACAAATGCTAAGCATATAGCTCTC
ACTGGTGTACACTCTTTGTCCATAAAGCTAGTGGTATTTCGTTGTGTGACCATACAGGGA
ACAAAGAACATCTCTACTGGTAACCGACTTCCTGAAGCTGTATCATACCTCCGTTGCTCT
GCCAGAATATCTAAATGAATGAGTATGTTGAATATAAACTCTTTGTATGGTAAAACTGCA
CGGAAGTCTTTCTGTTTCCATATCTGATACAAGTCTTCTCGATGTATGATCCCACTTTCT
GACATTCTCCTGAAAGTTTCCTGTATTCTTCTTTTCTTTGGCCAAAATCCTTCATCTAAA
AATAAACTAAAAATTTTTTTATTTTTTTTATTTTTTTAAACAATCTATTTTTTTAGCGAC
AAGCCGAAAACAATTTTTTTCTTTCAATTTTAGCATTACATATAGTGGCAGCTGAGGGTG
AAACAAACAATTTTTTTTTCTCAGAATCAAAAACAAATTATTTTTTTCTCCAAAAACTGG
AAACAAACTTTTTTTTCCAAAAAAAACCATAGCCCCCCCCAGAAAATCAAATGGTTGCTG
CCTAAGTGTTTAAACTTCACGTTGCAGAATCCAATGCATTTAAAAAAAATAAATAAATAA
GAATGTGTCCATAGTACATGGATGCCCCAATTGTACGGACGAACGGACGTATATATAGGT
CCAATACCCATAAATGAGGCATAAAAACAAACTAATCCCGCTGCAAATGTTTGCACCTGT
CCTAAGTCAGGAATCTGATGTACAGTATAGTTGTCGTTTTG
>contig_160 Average coverage: 14,74
CTGCACTGATGAAGCATTTTAAATTTGAACATGAATATTCAATGTGAAATGGCGATTGTT
GGCTGCGTTTTGCATGGACTGTGGAGTGGTAGAAATCTGAGATTCTTTCCATTGTTACAA
CCAGGCATTCTTTAACACCTGTAGCTATATCAGGTACGATTAACCCGGAGGAGGTTCTGT
GAATGATGTAAAGGAGAATCTTGTTGCCCTCAACGCATACAACGATGTCATGTGATTTGT
CAAATGATAAACCAATAAATCCTGAGAACAGGAGTTGTCTCCCTTCATACTGCTTCACGG
TCCACATGCTAAGACATGCACTGATCAGACGATTTGGTAGGGCTGGTGGTATAATAGTGC
CTTTAAATAAAAACGCTAAGCATATAGCTCTCTCTGGTGTACATTCTTTGTCCATGAAGT
TGGTGGTATTTCTCTCTGTAACCATACAGGGAACAAAGAAGTTTTCCACTGGTAACCGAC
TTCCTGTAGATGTATCATATCTCCGTTGCTCTGCTAGGATATCTAAATAAATCAAGCTGT
TAAATAT
>contig_161 Average coverage: 458,38
GGTTAAATGGACGATGACGGATAATGGATGCCAAGTGATGAGAAAAGCTCATTTTGCTCA
TTGAGCAAAGTGAGCTAAAAAAGAAAATGTTCTCCTCATTCTTAAAATTGAGAATGGAAA
TGGGGAATGTGCCAAAGAGACAACAACCCGACCATAGAAAAAAACAACAGCAGAAGGTCA
CCAACAGGTCTTCAATGTAGCGAGAAATTCCCGCACCCGGAGGCGTCCTTCAGCTGGCCC
CTAAACAAATATATACTAGTTCAGTGATAATGAACGCCATACTAATTTCCAAATTGTACA
CAAGAAACTAAAATTAAAATAATACAAGACTAACAAAGGCCAGAGGCTCCTGACTTGGGA
CAGGCGCAAAAATGCGGCGGGGTTAAACATGTTTGTGAGATCTCAACCCTCCCCCTATAC
CTCTAGCCAATGTAGAAAAGTAAACGCATAACAATACGCACATTAAAATTCAGTTCAAGA
GAAGTCCGAGTCTGATGTCAGAAGATGTAACCAAAGAAAATAAACAAAATGACAATAATA
CATAAA
>contig_162 Average coverage: 34,01
TAAAAAAAATAAAATTTAGTATACAACTCTTTAACAGGTATAAAAAAAAAAGCACAGCTG
TGTCATAACTTGTGAAATCTGTGCTGAAAACATAGACATTGATGGTATTTGAGTAATTCC
ATATGTGAAGCTCAACATTAGCTCGTCAGTTGGTGGTGGACAGTTATAGTTCCTTTCTGC
AGGCTAGGATGAATGACTTTTCAGGAAAACCAATTTCACAAATCAAAACTTTCCTCTAGA
TTTCTCCTACAATATTCATCCAGTTTAGTTCTTTTGGTTTAATTGGACACCGTCCTGATT
TTAATTTTGCAAACCATTCAGTCTCTTGCTTGCAAATGGTGCATGAAAATAGGATGGGTA
TGGCAGTAGACAAGTCTCTTTAAAGTGGGTTTGTGCCCTAGAAAAAAGTTTTATAACTTA
AGTTTTTTGAAACTTGTGCAACACACATACCTAAATAACTATAAAATAGAAGAGAGCATC
>contig_163 Average coverage: 38,07
CTACACTACAGCAAACATCATTAGGTTTACATTTAACAAATACGGATTTTAAATTAGTAT
ACAAATACTGTGACTGGTTTTTATAATGAATAAAGGATATCCCTGTGTGGCATTCCAACA
ATGACGTCACTAGGTTAGATATATTTAGAATATTTCGTAATACTGATTTTTCCGGACTGT
AAAAGAAACGTATATAGTGTAAGGGAAAGCTCAATATACGATAATTTCACGAGAAACAGA
AGGGAAATGTGTAAAAAATGTATTTAAAGTCAATCTGTTCTCCTTGTCATCAATTTCAGT
ATGACATTTTGAGGGGGTTTCCAAACTATCAAAACAAAATGATTGACGTGAGGGAATGAT
ACTCTGGCCAACCCCATTAGGGAATTGACGGCTTGAAGCCGTCTTTCCCCAAAAATGATA
TCACTTGTATTTATGTGTCTGTCATGTCTGTGGCCTCTGGTAATATTTCACAAATCAATT
TAATAATAAACTTTTACTATCAGACGTAATTGATAGTTTTCTTATCTTTACCATAATTGT
TCACTAGCAATTAAGACTAGATAGAACCTTTAACTTAGCGATCCTTTCCTAAACCATTTA
GCCATTCATGTAGAAAAATGTACTTTTCATGCTAGTGCTGATTAATCAGACAAATATTTA
CATTTCATTCAAAATTGTTACTTCATGTAAATCCAGACTCCAGGAGTTTGTTTCACAAAA
AAAACTTACGACTATGATTGGTTGTATAAGTACTGTATACTGAATTGTTCATGACTCACA
ATCAATCTTAGTCGTAAGTTTTTTTTGTGAAACCGACTCCAGGTAATTTAGTGGTTAACC
ATTCCCCCTCTTCATATAAACATTTCATATTATCGTCAGGACCAACATCATAATGGCAGT
TAAATATATATTTAAACAAGTCTTAAATTGAAAACTACTTTTAAATCTAAGACTGCGTTG
GATAAAAACTGCAATTTT
>contig_164 Average coverage: 65,32
GCTCTGAATCATCACATTTTCTTTTCTTATGTATTAAAGCTGATTTAGAGGGTTTGTTTT
[truncated: 141,574 more rows]
