# Supplementary material for: Target Capture and Massive Sequencing of Genes Transcribed in Mytilus galloprovincialis
Source: Biomed Res Int. 2014 Jun 30;2014:538549. doi: 10.1155/2014/538549 (PMC4101229; doi:10.1155/2014/538549)
Supplement: Supplementary file 1 — SM1. Confirmatory analysis of six selected genomic amplicons. Contig number and ID; primer pairs, amplicon length, description and related fasta sequences. SM2. Genomic library before (A) and after (B) amplification (BioAnalyzer High Sensitivity DNA chip, Agilent Technologies). Dimension peak was measured at 690 and 680bp, respectively. Sequencing output data: C) read length distribution, D) GC content, and E) PHRED quality score of the whole 454-sequencing dataset (RUN_1 and RUN_2). SM3. List of the 1355 target sequences with read coverage. Target length, number of counted reads and average coverage are reported. SM4. Genomic contigs resulting from de-novo assembling of all 454 genomic reads (fasta format). SM5. First-hit BLASTX annotation. Sequence data (ID, length and description) and annotation results (hit description and accession ID, e-value and % similarity) are reported for the most covered contigs (> 100 reads). SM6. Gene structure of contig 2509 (GADD45). A) gene, mRNA and CSD annotation; B) mapping of genomic 454 reads along the contig; C) mapping of trascriptomic Illumina reads along the contig and the coverage graph used to predict the gene structure; D-E) variant positions detected on genome and transcriptome, respectively. [file 538549.f1.zip › 538549.f1/SM5.xlsx]

## Sheet: Top-hit blast
SM5. First-hit BLAST annotation performed on the most covered contigs (> 100 reads).
Sequence ID	Sequence length	Sequence description	Hit description	Hit Accession ID	E-Value	Similarity
contig_94	4217	beta-actin	gi|312106932|ref|XP_003150813.1|beta-actin [Loa loa]	XP_003150813	1.64609e-123	100
contig_4674	3538	hypothetical protein OXYTRI_13058	gi|403334965|gb|EJY66653.1|hypothetical protein OXYTRI_13058 [Oxytricha trifallax]	EJY66653	1.09004e-44	58
contig_1186	3286	zinc finger protein	gi|405946392|gb|EKC17625.1|Krueppel-like factor 5 [Crassostrea gigas]	EKC17625	2.38408e-57	62
contig_598	3249	septin-8 isoform x2	gi|405950888|gb|EKC18845.1|Armadillo repeat-containing protein 4 [Crassostrea gigas]	EKC18845	5.9253e-24	88
contig_138	2926	Protein Y51F10.2	gi|25151067|ref|NP_740796.1|Protein Y51F10.2 [Caenorhabditis elegans] >gi|373220546|emb|CCD73473.1| Protein Y51F10.2 [Caenorhabditis elegans]	NP_740796	18.4783	58
contig_2479	2898	collagen alpha-1 chain	gi|405960914|gb|EKC26784.1|hypothetical protein CGI_10013214 [Crassostrea gigas]	EKC26784	1.34164e-05	63
contig_737	2802	zinc c2h2	gi|405973606|gb|EKC38308.1|Early growth response protein 3 [Crassostrea gigas]	EKC38308	5.16624e-110	64
contig_4370	2785	ribosyldihydronicotinamide dehydrogenase	gi|405968440|gb|EKC33512.1|Collagen alpha-6(VI) chain [Crassostrea gigas]	EKC33512	1.12359e-15	58
contig_2646	2781	chitinase 3	gi|405974134|gb|EKC38802.1|Chitotriosidase-1 [Crassostrea gigas]	EKC38802	5.08196e-07	67
contig_1072	2677	lysine-specific demethylase 5a	gi|405973316|gb|EKC38036.1|Lysine-specific demethylase 5A [Crassostrea gigas]	EKC38036	3.47243e-56	89
contig_3356	2665	carboxypeptidase b2	gi|197107255|pdb|3D4U|AChain A, Bovine Thrombin-Activatable Fibrinolysis Inhibitor (Tafia) In Complex With Tick-Derived Carboxypeptidase Inhibitor.	3D4U_A	0.111383	78
contig_5266	2496	cellulase	gi|405958289|gb|EKC24431.1|Histone-lysine N-methyltransferase MLL3 [Crassostrea gigas]	EKC24431	6.14118e-09	69
contig_826	2464	collagen alpha-1 chain	gi|260827154|ref|XP_002608530.1|hypothetical protein BRAFLDRAFT_92388 [Branchiostoma floridae] >gi|229293881|gb|EEN64540.1| hypothetical protein BRAFLDRAFT_92388 [Branchiostoma floridae]	XP_002608530	1.14632e-09	55
contig_5756	2390	nf-kappa-b inhibitor cactus-like	gi|403391483|gb|ABI37009.2|inhibitor protein kappa B-like protein [Azumapecten farreri]	ABI37009	2.32385e-71	69
contig_3111	2377	transcription initiation factor tfiid subunit 8	gi|405964001|gb|EKC29529.1|Transcription initiation factor TFIID subunit 8 [Crassostrea gigas]	EKC29529	6.23144e-10	90
contig_7155	2315	protein btg1	gi|405959703|gb|EKC25710.1|Protein BTG1 [Crassostrea gigas]	EKC25710	4.93578e-39	84
contig_3772	2283	peptidyl-prolyl cis-trans isomerase c	gi|163637061|gb|ABY27347.1|peptidylprolyl isomerase protein [Crassostrea gigas]	ABY27347	9.26342e-26	98
contig_8213	2274	mitochondrial atp synthase gamma subunit	gi|524917285|ref|XP_005113402.1|PREDICTED: ATP synthase subunit gamma, mitochondrial-like isoform X2 [Aplysia californica]	XP_005113402	5.92285e-11	78
contig_2192	2186	chaperone protein	gi|309355114|emb|CAP39502.2|Protein CBR-DNJ-10 [Caenorhabditis briggsae]	CAP39502	2.27436e-07	57
contig_961	2131	e3 ubiquitin-protein ligase mib1	gi|405964136|gb|EKC29653.1|E3 ubiquitin-protein ligase MIB1 [Crassostrea gigas]	EKC29653	3.74909e-22	100
contig_962	2103	btb poz domain-containing protein kctd16-like	gi|405963603|gb|EKC29165.1|BTB/POZ domain-containing protein KCTD16 [Crassostrea gigas]	EKC29165	1.52376e-136	87
contig_2470	2100	transcription factor ap-1	gi|529250140|ref|NP_001268726.1|uncharacterized protein LOC101863323 [Aplysia californica] >gi|401063651|gb|AFP89967.1| c-Jun [Aplysia californica]	NP_001268726	1.69915e-62	68
contig_4288	2087	hypothetical protein BRAFLDRAFT_80549	gi|260805140|ref|XP_002597445.1|hypothetical protein BRAFLDRAFT_80549 [Branchiostoma floridae] >gi|229282710|gb|EEN53457.1| hypothetical protein BRAFLDRAFT_80549 [Branchiostoma floridae]	XP_002597445	1.03781e-07	60
contig_5667	2070	26s proteasome non-atpase regulatory subunit 6	gi|405977534|gb|EKC41977.1|hypothetical protein CGI_10028159 [Crassostrea gigas]	EKC41977	1.73408e-12	45
contig_5298	2045	complement c1q-like protein 4	gi|325504331|emb|CBX41665.1|putative C1q domain containing protein MgC1q16 [Mytilus galloprovincialis]	CBX41665	8.35636e-92	99
contig_2352	2043	interleukin-1 receptor-associated kinase 4	gi|405962053|gb|EKC27765.1|Interleukin-1 receptor-associated kinase 4 [Crassostrea gigas]	EKC27765	9.71924e-49	79
contig_4648	2039	fbox domain containing protein	gi|405963369|gb|EKC28948.1|hypothetical protein CGI_10012792 [Crassostrea gigas]	EKC28948	1.24258e-142	77
contig_2771	2005	fibrinolytic isozyme c-like	gi|461858|sp|P35003.1|CTRL_HALRURecName: Full=Chymotrypsin-like serine proteinase; Flags: Precursor >gi|296362|emb|CAA50572.1| unnamed protein product [Haliotis rufescens]	P35003	1.09404e-05	91
contig_1832	1998	FosB	gi|255766996|gb|ACU33948.1|FosB [Crassostrea ariakensis]	ACU33948	2.01377e-05	72
contig_5451	1972	tripartite motif-containing protein 45	gi|405975270|gb|EKC39848.1|Tripartite motif-containing protein 45 [Crassostrea gigas]	EKC39848	2.96389e-07	48
contig_1904	1946	eukaryotic translation initiation factor 3 subunit partial	gi|405972127|gb|EKC36914.1|Eukaryotic translation initiation factor 3 subunit M, partial [Crassostrea gigas]	EKC36914	0.968584	88
contig_696	1945	cell wall hydrolase	gi|405951320|gb|EKC19243.1|Spore cortex-lytic enzyme [Crassostrea gigas]	EKC19243	2.28744e-28	65
contig_3053	1944	calponin transgelin	gi|405952674|gb|EKC20458.1|Myophilin [Crassostrea gigas]	EKC20458	7.78528e-10	88
contig_5494	1940	14-3-3 zeta	gi|405950429|gb|EKC18419.1|14-3-3 protein zeta [Crassostrea gigas]	EKC18419	7.0002e-109	82
contig_2643	1921	translocation protein sec63 homolog	gi|260834455|ref|XP_002612226.1|hypothetical protein BRAFLDRAFT_284846 [Branchiostoma floridae] >gi|229297601|gb|EEN68235.1| hypothetical protein BRAFLDRAFT_284846 [Branchiostoma floridae]	XP_002612226	0.00055002	86
contig_1574	1909	Matrilin-2	gi|405975677|gb|EKC40227.1|Matrilin-2 [Crassostrea gigas]	EKC40227	0.00365182	51
contig_5904	1879	leucine-rich repeat and immunoglobulin-like domain-containing nogo receptor-interacting protein 2	gi|405977928|gb|EKC42352.1|Leucine-rich repeat and immunoglobulin-like domain-containing nogo receptor-interacting protein 2 [Crassostrea gigas]	EKC42352	5.99795e-125	62
contig_1863	1872	hypothetical protein CGI_10021533	gi|405976814|gb|EKC41298.1|hypothetical protein CGI_10021533 [Crassostrea gigas]	EKC41298	1.33688e-21	67
contig_1071	1851	ribosomal protein l4	gi|225322928|gb|ACN86307.1|ribosomal protein-like protein [Pectinaria gouldii]	ACN86307	8.11187e-42	97
contig_3140	1824	hypothetical protein CGI_10014469	gi|405966814|gb|EKC32051.1|hypothetical protein CGI_10014469 [Crassostrea gigas]	EKC32051	8.10532e-67	53
contig_2671	1819	kyphoscoliosis peptidase	gi|405953320|gb|EKC21006.1|hypothetical protein CGI_10004855 [Crassostrea gigas]	EKC21006	6.13983e-79	76
contig_3408	1809	beta- -glucan-binding protein	gi|405966814|gb|EKC32051.1|hypothetical protein CGI_10014469 [Crassostrea gigas]	EKC32051	4.81059e-17	63
contig_4282	1801	septin-8 isoform x1	gi|405970532|gb|EKC35428.1|Septin-2 [Crassostrea gigas]	EKC35428	1.99011e-13	94
contig_6455	1792	ribosomal protein l10	gi|188572419|gb|ACD65116.1|putative 60S ribosomal protein RPL10 [Novocrania anomala]	ACD65116	2.7704e-30	95
contig_6332	1789	r3h domain-containing protein 4-like	gi|348523111|ref|XP_003449067.1|PREDICTED: R3H domain-containing protein C19orf22 homolog [Oreochromis niloticus]	XP_003449067	0.000272477	79
contig_270	1782	af162336_1mytilin b antimicrobial peptide precursor	gi|5533089|gb|AAD45013.1|AF162336_1mytilin B antimicrobial peptide precursor [Mytilus galloprovincialis] >gi|5815414|gb|AAD52661.1|AF177540_1 mytilin B precursor [Mytilus galloprovincialis]	AAD45013	4.11362e-22	90
contig_4172	1779	hypothetical protein EMIHUDRAFT_453585	gi|485606012|gb|EOD05979.1|hypothetical protein EMIHUDRAFT_453585 [Emiliania huxleyi CCMP1516]	EOD05979	4.07602e-150	64
contig_1618	1767	sarcoplasmic calcium-binding protein	gi|405963559|gb|EKC29122.1|Sarcoplasmic calcium-binding protein [Crassostrea gigas]	EKC29122	1.8028e-29	61
contig_2203	1761	78 kda glucose-regulated	gi|405968607|gb|EKC33663.1|78 kDa glucose-regulated protein [Crassostrea gigas]	EKC33663	4.12787e-78	88
contig_5841	1754	14-3-3 protein zeta delta	gi|326507178|dbj|BAJ95666.1|predicted protein [Hordeum vulgare subsp. vulgare]	BAJ95666	3.90373e-82	76
contig_4030	1750	short-chain collagen c4	gi|405960954|gb|EKC26821.1|hypothetical protein CGI_10013860 [Crassostrea gigas]	EKC26821	7.75312e-25	60
contig_288	1747	nuclease harbi1-like	gi|72015146|ref|XP_783499.1|PREDICTED: putative nuclease HARBI1-like [Strongylocentrotus purpuratus]	XP_783499	1.0749e-107	67
contig_6524	1744	transcription regulator protein bach1	gi|405964111|gb|EKC29633.1|Kelch-like protein 28 [Crassostrea gigas]	EKC29633	9.16972e-69	71
contig_802	1740	PREDICTED: uncharacterized protein LOC101847742	gi|524892910|ref|XP_005102978.1|PREDICTED: uncharacterized protein LOC101847742 [Aplysia californica]	XP_005102978	4.13109e-48	83
contig_3150	1740	frizzled-7	gi|405962300|gb|EKC27992.1|Frizzled-5 [Crassostrea gigas]	EKC27992	8.15409e-54	58
contig_6417	1717	sumo-conjugating enzyme partial	gi|351711177|gb|EHB14096.1|SUMO-conjugating enzyme UBC9, partial [Heterocephalus glaber]	EHB14096	0.00790869	86
contig_5161	1699	protein	gi|405951909|gb|EKC19778.1|Meprin A subunit beta [Crassostrea gigas]	EKC19778	2.45322e-25	65
contig_2602	1689	sialic acid binding lectin	gi|325504329|emb|CBX41664.1|putative C1q domain containing protein MgC1q15 [Mytilus galloprovincialis]	CBX41664	1.58451e-76	92
contig_5638	1689	beta-ig-h3 fasciclin	gi|156372880|ref|XP_001629263.1|predicted protein [Nematostella vectensis] >gi|156216259|gb|EDO37200.1| predicted protein [Nematostella vectensis]	XP_001629263	4.25415e-10	77
contig_4164	1685	short-chain collagen c4	gi|405964388|gb|EKC29881.1|Short-chain collagen C4 [Crassostrea gigas]	EKC29881	2.90999e-11	60
contig_2787	1681	multidrug resistance-associated protein 5	gi|405962900|gb|EKC28532.1|Multidrug resistance-associated protein 5 [Crassostrea gigas]	EKC28532	1.0819e-05	60
contig_209	1679	beta tubulin	gi|205345215|dbj|BAG71387.1|beta tubulin [Ctenella chagius]	BAG71387	3.59151e-64	95
contig_1408	1678	interleukin-1 receptor-associated kinase 4	gi|405978688|gb|EKC43058.1|Interleukin-1 receptor-associated kinase 4 [Crassostrea gigas]	EKC43058	3.39431e-85	57
contig_5070	1664	metaxin-2	gi|405978625|gb|EKC43002.1|Metaxin-2 [Crassostrea gigas]	EKC43002	3.09282e-96	75
contig_7220	1661	pancreatic lipase-related protein 1	gi|405969538|gb|EKC34504.1|Pancreatic lipase-related protein 1 [Crassostrea gigas]	EKC34504	5.65522e-12	71
contig_6520	1660	Afadin	gi|405978104|gb|EKC42518.1|Afadin [Crassostrea gigas]	EKC42518	4.22344e-49	56
contig_3209	1649	cyclic amp-dependent transcription factor atf-4	gi|405972457|gb|EKC37224.1|Cyclic AMP-dependent transcription factor ATF-5 [Crassostrea gigas]	EKC37224	9.3836e-20	70
contig_697	1633	swi snf complex subunit smarcc2-like	gi|405964075|gb|EKC29597.1|SWI/SNF complex subunit SMARCC2 [Crassostrea gigas]	EKC29597	1.00441e-40	94
contig_1722	1623	atp:adp antiporter	gi|405961646|gb|EKC27411.1|ADP,ATP carrier protein [Crassostrea gigas]	EKC27411	0.0	91
contig_4941	1618	myosin light chain smooth muscle-like	gi|405970417|gb|EKC35325.1|Titin [Crassostrea gigas]	EKC35325	5.64371e-25	80
contig_5860	1618	vacuolar protein sorting-associated protein 4b	gi|344268942|ref|XP_003406315.1|PREDICTED: vacuolar protein sorting-associated protein 4B-like [Loxodonta africana]	XP_003406315	6.10499e-11	93
contig_1262	1617	collagen alpha-4 chain	gi|405951583|gb|EKC19483.1|Collagen alpha-4(VI) chain [Crassostrea gigas]	EKC19483	0.273436	71
contig_1805	1599	neurogenic locus notch	gi|270000757|gb|EEZ97204.1|hypothetical protein TcasGA2_TC004393 [Tribolium castaneum]	EEZ97204	6.32307e-15	62
contig_1329	1596	deoxyribonuclease tatdn3	gi|405969456|gb|EKC34427.1|Putative deoxyribonuclease TATDN3 [Crassostrea gigas]	EKC34427	1.20328e-96	80
contig_1384	1595	exosome complex component rrp46	gi|405978848|gb|EKC43209.1|Exosome complex exonuclease RRP46 [Crassostrea gigas]	EKC43209	2.24171e-77	80
contig_4786	1594	transmembrane protein 86a	gi|405967663|gb|EKC32799.1|Transmembrane protein 86A [Crassostrea gigas] >gi|405967664|gb|EKC32800.1| Transmembrane protein 86A [Crassostrea gigas]	EKC32799	1.29764e-51	63
contig_1656	1591	dbh-like monooxygenase protein 2-like	gi|524873245|ref|XP_005093372.1|PREDICTED: DBH-like monooxygenase protein 1-like, partial [Aplysia californica]	XP_005093372	0.00126686	54
contig_3979	1580	hypothetical protein CGI_10025511	gi|405963971|gb|EKC29502.1|hypothetical protein CGI_10025511 [Crassostrea gigas]	EKC29502	3.13366e-171	69
contig_3717	1575	calponin homolog	gi|14422379|dbj|BAB60813.1|calponin-like protein [Mytilus galloprovincialis]	BAB60813	5.80017e-170	99
contig_1407	1569	vacuolar amino acid	gi|405973084|gb|EKC37816.1|Lysine histidine transporter 1 [Crassostrea gigas]	EKC37816	4.24183e-21	75
contig_1563	1553	neuroblastoma-amplified sequence-like	gi|524893556|ref|XP_005103287.1|PREDICTED: neuroblastoma-amplified sequence-like [Aplysia californica]	XP_005103287	1.10358e-05	65
contig_1819	1553	embryonic isoform x1	gi|512882494|ref|XP_004919965.1|PREDICTED: embryonic protein UVS.2-like [Xenopus (Silurana) tropicalis]	XP_004919965	0.856336	41
contig_3749	1550	organic cation transporter protein	gi|405954357|gb|EKC21821.1|Organic cation transporter protein [Crassostrea gigas]	EKC21821	1.77894e-22	89
contig_633	1548	tripartite motif-containing protein 3	gi|405975694|gb|EKC40243.1|Tripartite motif-containing protein 3 [Crassostrea gigas]	EKC40243	0.0	84
contig_3066	1548	apolipoprotein of lipid transfer particle-i ii	gi|524869373|ref|XP_005091481.1|PREDICTED: uncharacterized protein LOC101854471 [Aplysia californica]	XP_005091481	2.98831e-10	62
contig_5281	1547	protein	gi|156407121|ref|XP_001641393.1|predicted protein [Nematostella vectensis] >gi|156228531|gb|EDO49330.1| predicted protein [Nematostella vectensis]	XP_001641393	1.04356e-14	51
contig_122	1544	tubulin beta-2c chain	gi|350536299|ref|NP_001232239.1|putative tubulin beta 2 [Taeniopygia guttata] >gi|197129678|gb|ACH46176.1| putative tubulin beta 2 [Taeniopygia guttata]	NP_001232239	7.77457e-56	100
contig_4209	1544	tripartite motif-containing protein 56	gi|405958552|gb|EKC24668.1|Midline-2 [Crassostrea gigas]	EKC24668	2.80641e-27	57
contig_362	1537	nuclease harbi1-like	gi|345496226|ref|XP_003427676.1|PREDICTED: putative nuclease HARBI1-like [Nasonia vitripennis]	XP_003427676	0.00452096	55
contig_4910	1536	coiled-coil domain-containing protein 170	gi|405959136|gb|EKC25200.1|Coiled-coil domain-containing protein C6orf97 [Crassostrea gigas]	EKC25200	7.19224e-25	96
contig_549	1533	serine rich protein	gi|470427696|ref|XP_004338018.1|serine rich protein [Acanthamoeba castellanii str. Neff] >gi|440794860|gb|ELR16005.1| serine rich protein [Acanthamoeba castellanii str. Neff]	XP_004338018	3.2022e-28	54
contig_5243	1529	tctex1 domain-containing protein 1-b	gi|405977382|gb|EKC41839.1|Tctex1 domain-containing protein 1-A [Crassostrea gigas]	EKC41839	1.36625e-26	69
contig_7472	1525	adp-ribosylation factor 2-like	gi|307191077|gb|EFN74817.1|ADP-ribosylation factor 2 [Camponotus floridanus]	EFN74817	5.26659e-07	80
contig_5605	1522	xaa-pro dipeptidase	gi|405945534|gb|EKC17375.1|Xaa-Pro dipeptidase [Crassostrea gigas]	EKC17375	4.39502e-08	87
contig_2082	1509	transcription factor sox-14	gi|405964900|gb|EKC30339.1|Putative transcription factor SOX-14 [Crassostrea gigas]	EKC30339	9.34285e-104	82
contig_3019	1507	hypothetical protein CGI_10014469	gi|405966814|gb|EKC32051.1|hypothetical protein CGI_10014469 [Crassostrea gigas]	EKC32051	2.15042e-14	61
contig_1941	1505	hypothetical protein CGI_10018324	gi|405969268|gb|EKC34249.1|hypothetical protein CGI_10018324 [Crassostrea gigas]	EKC34249	2.18476e-36	77
contig_439	1493	ubiquitin-conjugating enzyme e2 i	gi|391234220|gb|AFM38810.1|ubiquitin-conjugating enzyme E2-like protein, partial [Concholepas concholepas]	AFM38810	1.28585e-09	100
contig_3537	1488	39s ribosomal protein mitochondrial	gi|61806488|ref|NP_001013476.1|39S ribosomal protein L10, mitochondrial precursor [Danio rerio] >gi|82178554|sp|Q5BJB7.1|RM10_DANRE RecName: Full=39S ribosomal protein L10, mitochondrial; Short=L10mt; Short=MRP-L10; Flags: Precursor >gi|60551701|gb|AAH91546.1| Mitochondrial ribosomal protein L10 [Danio rerio]	NP_001013476	0.158292	62
contig_1531	1486	actin	gi|159507454|gb|ABW97741.1|beta-actin [Crassostrea ariakensis]	ABW97741	0.0	96
contig_6322	1481	heat shock 70 kda protein 12b	gi|359359685|gb|AEV41411.1|HSPA12A [Mytilus galloprovincialis]	AEV41411	4.47113e-31	98
contig_888	1477	lin-24 like family member	gi|405964055|gb|EKC29577.1|hypothetical protein CGI_10027361 [Crassostrea gigas]	EKC29577	1.13669e-39	59
contig_2097	1467	lipopolysaccharide-induced tumor necrosis factor-alpha factor-like protein	gi|405971392|gb|EKC36231.1|Lipopolysaccharide-induced tumor necrosis factor-alpha factor-like protein [Crassostrea gigas]	EKC36231	3.72443e-08	97
contig_2802	1456	rna-binding protein	gi|144952800|gb|ABP04054.1|RNA-binding protein [Pinctada fucata]	ABP04054	2.48548e-09	79
contig_201	1455	collagen alpha-1 chain	gi|405954160|gb|EKC21677.1|hypothetical protein CGI_10003549 [Crassostrea gigas]	EKC21677	4.78115e-33	52
contig_4315	1454	hypothetical protein CGI_10016852	gi|405960490|gb|EKC26411.1|hypothetical protein CGI_10016852 [Crassostrea gigas]	EKC26411	7.3481e-32	51
contig_1231	1441	pre-mrna-splicing factor rbm22	gi|524906382|ref|XP_005108504.1|PREDICTED: pre-mRNA-splicing factor RBM22-like [Aplysia californica]	XP_005108504	2.56544e-05	75
contig_2372	1426	c1q domain containing protein 1q7	gi|325504313|emb|CBX41656.1|putative C1q domain containing protein MgC1q7 [Mytilus galloprovincialis]	CBX41656	4.02509e-13	95
contig_4395	1426	eukaryotic translation initiation factor 3 subunit h	gi|524886666|ref|XP_005099926.1|PREDICTED: eukaryotic translation initiation factor 3 subunit H-like [Aplysia californica]	XP_005099926	1.06474e-21	80
contig_5349	1426	collagen alpha-6 chain	gi|405961288|gb|EKC27115.1|Collagen alpha-6(VI) chain [Crassostrea gigas]	EKC27115	4.06809e-30	65
contig_2915	1422	rna-directed dna polymerase from mobile element jockey-like	gi|449680965|ref|XP_004209715.1|PREDICTED: RNA-directed DNA polymerase from mobile element jockey-like [Hydra magnipapillata]	XP_004209715	1.34945e-20	56
contig_699	1421	swi snf complex subunit smarcc1	gi|511882683|ref|XP_004761220.1|PREDICTED: SWI/SNF complex subunit SMARCC1 [Mustela putorius furo]	XP_004761220	3.42597e-26	85
contig_1148	1419	coiled-coil domain-containing protein 51-like	gi|240995613|ref|XP_002404631.1|serine/threonine specific phosphatase, putative [Ixodes scapularis] >gi|215491633|gb|EEC01274.1| serine/threonine specific phosphatase, putative [Ixodes scapularis]	XP_002404631	1.94829e-40	60
contig_1664	1416	calmodulin	gi|312067930|ref|XP_003136975.1|hypothetical protein LOAG_01388 [Loa loa]	XP_003136975	2.54194e-41	96
contig_4298	1408	collagen alpha-1 chain	gi|405958346|gb|EKC24482.1|Collagen alpha-6(VI) chain [Crassostrea gigas]	EKC24482	1.4057e-43	66
contig_7018	1402	endocytosis signaling protein	gi|405952808|gb|EKC20575.1|EH domain-containing protein 1 [Crassostrea gigas]	EKC20575	0.0	96
contig_9382	1395	succinyl- ligase	gi|291236627|ref|XP_002738240.1|PREDICTED: succinate-CoA ligase, GDP-forming, alpha subunit-like [Saccoglossus kowalevskii]	XP_002738240	1.60135e-06	97
contig_2689	1391	heat shock protein 90	gi|194245631|gb|ACF35426.1|heat shock protein 90 [Laternula elliptica]	ACF35426	7.54691e-62	96
contig_7869	1388	sialic acid binding lectin	gi|325504493|emb|CBX41746.1|putative C1q domain containing protein MgC1q97 [Mytilus galloprovincialis]	CBX41746	1.65472e-83	97
contig_1928	1387	hypothetical protein CGI_10006614	gi|405957766|gb|EKC23952.1|hypothetical protein CGI_10006614 [Crassostrea gigas]	EKC23952	4.85802e-60	61
contig_4798	1386	apoptosis 2 inhibitor	gi|260790557|ref|XP_002590308.1|hypothetical protein BRAFLDRAFT_76561 [Branchiostoma floridae] >gi|229275500|gb|EEN46319.1| hypothetical protein BRAFLDRAFT_76561 [Branchiostoma floridae]	XP_002590308	0.0286822	72
contig_1053	1380	hypothetical protein CGI_10006255	gi|405964000|gb|EKC29528.1|hypothetical protein CGI_10006255 [Crassostrea gigas]	EKC29528	1.21834e-24	62
contig_2495	1378	myeloid differentiation primary response protein 88	gi|404251504|gb|AFR54116.1|myeloid differentiation factor 88a [Mytilus galloprovincialis]	AFR54116	4.29713e-68	100
contig_5978	1375	ino80 complex subunit c-like	gi|524870535|ref|XP_005092052.1|PREDICTED: INO80 complex subunit C-like [Aplysia californica]	XP_005092052	0.138112	73
contig_2129	1365	anhydro-n-acetylmuramic acid kinase	gi|405950134|gb|EKC18138.1|Anhydro-N-acetylmuramic acid kinase [Crassostrea gigas]	EKC18138	9.74611e-95	73
contig_10275	1359	mft2 - corn mft-like protein	gi|405957445|gb|EKC23654.1|Tyrosine-protein phosphatase non-receptor type 6 [Crassostrea gigas]	EKC23654	3.30889e-09	65
contig_7097	1356	component of the counting factor complex	gi|405978662|gb|EKC43032.1|Countin-1 [Crassostrea gigas]	EKC43032	2.35147e-08	92
contig_4601	1343	probable trna threonylcarbamoyladenosine biosynthesis protein osgepl1	gi|443733480|gb|ELU17835.1|hypothetical protein CAPTEDRAFT_106307 [Capitella teleta]	ELU17835	4.78732e-07	71
contig_7218	1338	PREDICTED: uncharacterized protein LOC100184451 isoform 2	gi|459172420|ref|XP_004225522.1|PREDICTED: uncharacterized protein LOC100184451 isoform 2 [Ciona intestinalis]	XP_004225522	7.53854e-07	59
contig_463	1336	baculoviral iap repeat-containing 2	gi|217030813|dbj|BAG06936.2|baculoviral IAP repeat-containing 2 [Carassius auratus]	BAG06936	1.02074e-13	46
contig_4512	1333	hypothetical protein CAPTEDRAFT_175196	gi|443708418|gb|ELU03534.1|hypothetical protein CAPTEDRAFT_175196 [Capitella teleta]	ELU03534	2.01538e-29	57
contig_2224	1325	eukaryotic translation initiation factor 4 1	gi|299472690|emb|CBN78342.1|similar to eukaryotic translation initiation factor 4 gamma, 1 [Ectocarpus siliculosus]	CBN78342	43.3352	37
contig_686	1318	tribbles homolog 1	gi|405955773|gb|EKC22747.1|Tribbles-like protein 2 [Crassostrea gigas]	EKC22747	6.46416e-61	85
contig_150	1313	myticin c precursor	gi|6647599|sp|P82103.1|MYNA_MYTGARecName: Full=Myticin-A; Flags: Precursor >gi|5712761|gb|AAD47638.1|AF162334_1 antimicrobial peptide precursor myticin A [Mytilus galloprovincialis]	P82103	4.96429e-29	88
contig_1542	1310	beta partial	gi|197210385|gb|ACH48200.1|beta tubulin [Haplopelma schmidti]	ACH48200	7.07166e-29	89
contig_10063	1301	nad h dehydrogenase	gi|512808435|ref|XP_004875982.1|PREDICTED: NAD(P)H dehydrogenase [quinone] 1 isoform X2 [Heterocephalus glaber] >gi|512961456|ref|XP_004842993.1| PREDICTED: NAD(P)H dehydrogenase [quinone] 1 isoform X2 [Heterocephalus glaber]	XP_004875982	0.00982044	50
contig_2048	1298	GJ10213	gi|195395680|ref|XP_002056464.1|GJ10213 [Drosophila virilis] >gi|194143173|gb|EDW59576.1| GJ10213 [Drosophila virilis]	XP_002056464	64.1138	49
contig_7080	1294	la-related protein 1	gi|405950801|gb|EKC18764.1|La-related protein 1 [Crassostrea gigas]	EKC18764	1.50501e-08	64
contig_6560	1289	wd repeat-containing protein 53	gi|405973611|gb|EKC38313.1|WD repeat-containing protein 53 [Crassostrea gigas]	EKC38313	1.36306e-119	72
contig_401	1287	toxin a precursor	gi|401728797|gb|AFQ00676.1|toxin A precursor [Chironex fleckeri]	AFQ00676	2.62433e-28	44
contig_4363	1287	protein mab-21-like 3	gi|291242079|ref|XP_002740936.1|PREDICTED: mab-21-like protein 2-like [Saccoglossus kowalevskii]	XP_002740936	5.98729e-35	54
contig_1929	1278	anhydro-n-acetylmuramic acid kinase	gi|405950134|gb|EKC18138.1|Anhydro-N-acetylmuramic acid kinase [Crassostrea gigas]	EKC18138	3.78414e-24	65
contig_2052	1275	elongation factor partial	gi|410058253|ref|XP_001161287.2|PREDICTED: elongation factor 2, partial [Pan troglodytes]	XP_001161287	9.18909e-24	90
contig_6660	1275	clathrin light chain b isoform x2	gi|405975921|gb|EKC40452.1|Clathrin light chain A [Crassostrea gigas]	EKC40452	2.90654e-11	88
contig_4627	1273	translational elongation factor-2	gi|405967652|gb|EKC32788.1|hypothetical protein CGI_10017178 [Crassostrea gigas]	EKC32788	9.98533e-26	95
contig_6028	1273	tpa: galectin-7-like	gi|405975976|gb|EKC40501.1|Galectin-9 [Crassostrea gigas]	EKC40501	1.09254e-17	63
contig_9125	1271	hypothetical protein CGI_10016230	gi|405970006|gb|EKC34946.1|hypothetical protein CGI_10016230 [Crassostrea gigas]	EKC34946	1.17913e-48	58
contig_1042	1267	succinyl- ligase	gi|260831053|ref|XP_002610474.1|hypothetical protein BRAFLDRAFT_124275 [Branchiostoma floridae] >gi|229295840|gb|EEN66484.1| hypothetical protein BRAFLDRAFT_124275 [Branchiostoma floridae]	XP_002610474	0.0424452	82
contig_8561	1266	vitelline membrane outer layer protein 1-like	gi|405959466|gb|EKC25506.1|Vitelline membrane outer layer protein 1 [Crassostrea gigas]	EKC25506	6.75159e-11	65
contig_5097	1264	s-crystallin sl11-like	gi|402227995|gb|AFQ35985.1|glutathione S-transferase sigma 3 [Mytilus galloprovincialis]	AFQ35985	2.84496e-12	79
contig_6915	1264	hypothetical protein CGI_10025005	gi|405965643|gb|EKC31005.1|hypothetical protein CGI_10025005 [Crassostrea gigas]	EKC31005	1.15036e-56	62
contig_1281	1263	solute carrier family 25 member 38	gi|405963484|gb|EKC29053.1|Solute carrier family 25 member 38 [Crassostrea gigas]	EKC29053	0.000416469	72
contig_4139	1263	glutathione s-transferase sigma 3	gi|402227995|gb|AFQ35985.1|glutathione S-transferase sigma 3 [Mytilus galloprovincialis]	AFQ35985	8.86825e-20	98
contig_20	1255	map microtubule affinity-regulating kinase	gi|405972675|gb|EKC37431.1|MAP/microtubule affinity-regulating kinase 3 [Crassostrea gigas]	EKC37431	1.11584e-18	96
contig_8296	1255	hypothetical protein CGI_10013999	gi|405950273|gb|EKC18271.1|hypothetical protein CGI_10013999 [Crassostrea gigas]	EKC18271	57.9136	60
contig_6800	1254	superoxide dismutase	gi|332031477|gb|EGI70961.1|Superoxide dismutase [Acromyrmex echinatior]	EGI70961	4.12581e-07	87
contig_349	1247	fbox domain containing protein	gi|405963369|gb|EKC28948.1|hypothetical protein CGI_10012792 [Crassostrea gigas]	EKC28948	5.5406e-97	73
contig_1958	1247	complement c1q-like protein 4	gi|405976013|gb|EKC40537.1|Heavy metal-binding protein HIP [Crassostrea gigas]	EKC40537	8.29991e-21	54
contig_1534	1245	proteasome assembly chaperone 2-like	gi|405959471|gb|EKC25511.1|Proteasome assembly chaperone 2, partial [Crassostrea gigas]	EKC25511	1.5389e-17	91
contig_2567	1241	1-phosphatidylinositol- -bisphosphate phosphodiesterase gamma-1	gi|405951572|gb|EKC19473.1|1-phosphatidylinositol-4,5-bisphosphate phosphodiesterase gamma-1 [Crassostrea gigas]	EKC19473	44.0035	68
contig_4465	1238	heat shock protein	gi|347545631|gb|AEP02967.1|small heat shock protein 22 [Mytilus galloprovincialis]	AEP02967	2.14915e-88	100
contig_3171	1234	tubulin beta-4b chain	gi|156336344|ref|XP_001619700.1|hypothetical protein NEMVEDRAFT_v1g223919 [Nematostella vectensis] >gi|156203406|gb|EDO27600.1| predicted protein [Nematostella vectensis]	XP_001619700	3.18693e-82	98
contig_1087	1233	hypothetical protein SELMODRAFT_425932	gi|302810813|ref|XP_002987097.1|hypothetical protein SELMODRAFT_425932 [Selaginella moellendorffii] >gi|300145262|gb|EFJ11940.1| hypothetical protein SELMODRAFT_425932 [Selaginella moellendorffii]	XP_002987097	6.59836e-13	51
contig_3416	1222	amine oxidase	gi|517162282|ref|WP_018351100.1|hypothetical protein [Longispora albida]	WP_018351100	5.13027e-39	54
contig_921	1220	eukaryotic translation initiation factor 3 subunit a	gi|405959052|gb|EKC25123.1|Eukaryotic translation initiation factor 3 subunit A, partial [Crassostrea gigas]	EKC25123	1.88738e-19	92
contig_4999	1220	switch-associated protein 70	gi|405972589|gb|EKC37351.1|Switch-associated protein 70 [Crassostrea gigas]	EKC37351	1.26536	56
contig_3832	1214	kyphoscoliosis peptidase	gi|405970056|gb|EKC34991.1|Kyphoscoliosis peptidase [Crassostrea gigas]	EKC34991	7.49418e-61	73
contig_2025	1211	map kinase-interacting serine threonine-protein kinase 1	gi|405950593|gb|EKC18571.1|MAP kinase-interacting serine/threonine-protein kinase 1 [Crassostrea gigas]	EKC18571	5.74924e-34	88
contig_725	1209	translocon-associated protein subunit gamma-like	gi|66519504|ref|XP_624674.1|PREDICTED: translocon-associated protein subunit gamma-like [Apis mellifera] >gi|110769762|ref|XP_001119895.1| PREDICTED: translocon-associated protein subunit gamma-like [Apis mellifera] >gi|380015648|ref|XP_003691811.1| PREDICTED: translocon-associated protein subunit gamma-like [Apis florea]	XP_624674	6.55692e-09	100
contig_5267	1208	isoform a	gi|405961655|gb|EKC27420.1|Fascin [Crassostrea gigas]	EKC27420	2.3185e-120	83
contig_450	1207	c1q domain containing protein 1q51	gi|325504401|emb|CBX41700.1|putative C1q domain containing protein MgC1q51 [Mytilus galloprovincialis]	CBX41700	1.86801e-81	98
contig_1131	1207	heat shock protein 70	gi|57635269|gb|AAW52766.1|HSP70 [Mytilus galloprovincialis]	AAW52766	1.39066e-56	100
contig_9041	1204	proteasome subunit beta type 1-a	gi|209734840|gb|ACI68289.1|Proteasome subunit beta type-1-A [Salmo salar]	ACI68289	3.38597e-15	86
contig_4012	1202	zinc transporter zip9 isoform 4	gi|405971332|gb|EKC36175.1|Zinc transporter ZIP9-B [Crassostrea gigas]	EKC36175	5.82332e-27	90
contig_1962	1198	c1q domain containing protein 1q54	gi|325504407|emb|CBX41703.1|putative C1q domain containing protein MgC1q54 [Mytilus galloprovincialis]	CBX41703	2.05623e-45	95
contig_4401	1197	selenium binding protein	gi|61197416|gb|AAX39709.1|selenium-binding protein [Azumapecten farreri]	AAX39709	3.67746e-11	81
contig_4658	1188	collagen alpha-1 chain	gi|405966044|gb|EKC31369.1|Collagen alpha-1(XII) chain [Crassostrea gigas]	EKC31369	9.67715e-53	71
contig_7474	1188	putative uromodulin	gi|122056402|gb|ABM66068.1|putative uromodulin [Mytilus galloprovincialis]	ABM66068	0.000194419	84
contig_9467	1187	hypothetical protein BRAFLDRAFT_89480	gi|260791303|ref|XP_002590679.1|hypothetical protein BRAFLDRAFT_89480 [Branchiostoma floridae] >gi|229275875|gb|EEN46690.1| hypothetical protein BRAFLDRAFT_89480 [Branchiostoma floridae]	XP_002590679	7.85061e-30	48
contig_2103	1180	af134173_1myosin essential light chain	gi|5817600|gb|AAD52843.1|AF134173_1myosin essential light chain [Pecten maximus]	AAD52843	0.925612	83
contig_5031	1180	cyclase family protein	gi|405971061|gb|EKC35917.1|Kynurenine formamidase [Crassostrea gigas]	EKC35917	6.38853e-71	70
contig_1704	1175	pyridoxal phosphate phosphatase phospho2	gi|405959597|gb|EKC25613.1|Pyridoxal phosphate phosphatase PHOSPHO2 [Crassostrea gigas]	EKC25613	4.40507e-56	70
contig_8150	1175	ganglioside gm2 activator	gi|504150366|ref|XP_004587578.1|PREDICTED: ganglioside GM2 activator [Ochotona princeps]	XP_004587578	3.94454e-08	72
contig_2445	1170	proteasome inhibitor pi31 subunit	gi|524889915|ref|XP_005101509.1|PREDICTED: proteasome inhibitor PI31 subunit-like [Aplysia californica]	XP_005101509	0.0689176	75
contig_2826	1169	neuronal apoptosis inhibitory protein 5	gi|507966692|ref|XP_004689103.1|PREDICTED: baculoviral IAP repeat-containing protein 3 [Condylura cristata]	XP_004689103	0.000217413	52
contig_9544	1161	tripartite motif-containing protein partial	gi|25151067|ref|NP_740796.1|Protein Y51F10.2 [Caenorhabditis elegans] >gi|373220546|emb|CCD73473.1| Protein Y51F10.2 [Caenorhabditis elegans]	NP_740796	1.86445	58
contig_414	1156	calponin-like protein	gi|405975242|gb|EKC39823.1|Calponin-2 [Crassostrea gigas]	EKC39823	6.92318e-79	66
contig_766	1154	collagen alpha-6 chain	gi|524892586|ref|XP_005102820.1|PREDICTED: uncharacterized protein LOC101848762 [Aplysia californica]	XP_005102820	9.28447e-36	65
contig_6571	1154	tyrosinase-like protein tyr-3	gi|528897726|gb|AGS47960.1|tyrosinase-like protein tyr-2 [Pinctada martensi]	AGS47960	3.58319e-40	60
contig_11253	1154	lethal isoform b	gi|524902456|ref|XP_005107478.1|PREDICTED: uncharacterized protein LOC101858890 [Aplysia californica]	XP_005107478	8.99382e-10	55
contig_10079	1153	fibrinogen c domain-containing protein 1- partial	gi|405969217|gb|EKC34200.1|Tenascin [Crassostrea gigas]	EKC34200	0.569462	69
contig_5779	1151	complement c1q-like protein 4	gi|325504323|emb|CBX41661.1|putative C1q domain containing protein MgC1q12 [Mytilus galloprovincialis]	CBX41661	2.9279e-84	85
contig_7303	1151	nc domain protein	gi|443715104|gb|ELU07255.1|hypothetical protein CAPTEDRAFT_190177 [Capitella teleta]	ELU07255	1.23325e-07	51
contig_6689	1142	trim56 protein	gi|405958433|gb|EKC24561.1|Tripartite motif-containing protein 56 [Crassostrea gigas]	EKC24561	7.26279e-171	89
contig_7518	1140	collagen alpha-1 chain	gi|260810967|ref|XP_002600194.1|hypothetical protein BRAFLDRAFT_66699 [Branchiostoma floridae] >gi|229285480|gb|EEN56206.1| hypothetical protein BRAFLDRAFT_66699 [Branchiostoma floridae]	XP_002600194	3.22431e-05	57
contig_9955	1140	superoxide dismutase	gi|443699453|gb|ELT98943.1|hypothetical protein CAPTEDRAFT_229194 [Capitella teleta]	ELT98943	4.1785e-06	67
contig_1654	1139	radial spoke head protein 4 homolog a	gi|405972803|gb|EKC37551.1|Radial spoke head protein 4-like protein A [Crassostrea gigas]	EKC37551	1.25115e-12	80
contig_2020	1139	aquaporin-4-like isoform x1	gi|405970520|gb|EKC35416.1|Aquaporin-4 [Crassostrea gigas]	EKC35416	7.65769e-70	77
contig_2929	1136	cathepsin c	gi|405968896|gb|EKC33922.1|Dipeptidyl-peptidase 1, partial [Crassostrea gigas]	EKC33922	1.22878e-42	84
contig_3783	1136	c-binding protein	gi|405973307|gb|EKC38029.1|hypothetical protein CGI_10018710 [Crassostrea gigas]	EKC38029	2.65244e-06	61
contig_325	1122	tripartite motif-containing protein 45	gi|405978709|gb|EKC43078.1|Tripartite motif-containing protein 45 [Crassostrea gigas]	EKC43078	0.000106996	51
contig_3303	1114	cytosolic phospholipase a2	gi|405966112|gb|EKC31432.1|Cytosolic phospholipase A2 [Crassostrea gigas]	EKC31432	6.71122e-19	77
contig_1859	1112	astacin-like squid metalloprotease type iii	gi|405978762|gb|EKC43126.1|Astacin [Crassostrea gigas]	EKC43126	9.2155e-06	56
contig_2324	1112	protein dnj-13	gi|375073740|gb|AFA34425.1|DnaJ/hsp40-like superfamily B member 4, partial [Ostrea edulis]	AFA34425	1.58173e-09	75
contig_689	1107	nad-dependent protein deacetylase sirtuin-4	gi|260821125|ref|XP_002605884.1|hypothetical protein BRAFLDRAFT_87444 [Branchiostoma floridae] >gi|229291220|gb|EEN61894.1| hypothetical protein BRAFLDRAFT_87444 [Branchiostoma floridae]	XP_002605884	4.72808e-72	77
contig_7475	1107	electroneutral sodium bicarbonate exchanger 1-like	gi|405971520|gb|EKC36355.1|Electroneutral sodium bicarbonate exchanger 1 [Crassostrea gigas]	EKC36355	4.03334e-31	83
contig_7898	1107	hypothetical protein CGI_10024991	gi|405965630|gb|EKC30992.1|hypothetical protein CGI_10024991 [Crassostrea gigas]	EKC30992	1.41536e-17	82
contig_1106	1105	glucose dehydrogenase	gi|443702074|gb|ELU00236.1|hypothetical protein CAPTEDRAFT_169911 [Capitella teleta]	ELU00236	1.85933e-08	64
contig_6275	1099	melanin-concentrating hormone receptor 2	gi|405970654|gb|EKC35542.1|hypothetical protein CGI_10005167 [Crassostrea gigas]	EKC35542	2.44475e-48	62
contig_1559	1095	e3 ubiquitin-protein ligase trim33	gi|405967139|gb|EKC32339.1|E3 ubiquitin-protein ligase TRIM33 [Crassostrea gigas]	EKC32339	35.1344	57
contig_3858	1094	loc397861 protein	gi|54038660|gb|AAH84224.1|Unknown (protein for MGC:80886) [Xenopus laevis]	AAH84224	1.21027e-13	79
contig_4484	1093	serine threonine-protein phosphatase mitochondrial-like	gi|498928429|ref|XP_004518395.1|PREDICTED: serine/threonine-protein phosphatase Pgam5, mitochondrial-like [Ceratitis capitata]	XP_004518395	0.000111808	76
contig_3038	1091	bcl2 protein	gi|485895554|gb|AGK88246.1|Bcl2 protein [Mytilus galloprovincialis]	AGK88246	9.97257e-13	95
contig_5082	1091	transcription initiation factor tfiid subunit 1	gi|443709550|gb|ELU04183.1|hypothetical protein CAPTEDRAFT_225982 [Capitella teleta]	ELU04183	0.000379504	60
contig_8246	1087	serine arginine repetitive matrix protein 1	gi|405961822|gb|EKC27566.1|Serine/arginine repetitive matrix protein 1 [Crassostrea gigas]	EKC27566	1.70494e-07	87
contig_2149	1085	estradiol 17-beta-dehydrogenase 12-b	gi|532525794|gb|AGT97388.1|17 beta-hydroxysteroid dehydrogenase 12 [Mytilus galloprovincialis]	AGT97388	6.11307e-09	88
contig_4716	1076	mediator of rna polymerase ii transcription subunit 20-like	gi|405969414|gb|EKC34387.1|Mediator of RNA polymerase II transcription subunit 20 [Crassostrea gigas]	EKC34387	1.27229e-34	90
contig_1980	1072	arf-gap with ank repeat and ph domain-containing protein 1-like isoform x1	gi|405967890|gb|EKC33009.1|Centaurin-gamma-1A [Crassostrea gigas]	EKC33009	5.21627e-21	86
contig_4629	1072	c1q domain containing protein 1q13	gi|325504325|emb|CBX41662.1|putative C1q domain containing protein MgC1q13 [Mytilus galloprovincialis]	CBX41662	4.08919e-05	89
contig_2657	1071	thioester-containing protein	gi|281833716|gb|ADA77515.1|thioester-containing protein-D [Azumapecten farreri]	ADA77515	0.0009097	79
contig_9514	1070	ribosomal protein s5	gi|188572381|gb|ACD65097.1|putative 40S ribosomal protein RPS5 [Novocrania anomala]	ACD65097	5.68629e-32	94
contig_2731	1069	hypothetical protein CGI_10007922	gi|405951796|gb|EKC19677.1|hypothetical protein CGI_10007922 [Crassostrea gigas]	EKC19677	0.000123814	58
contig_6276	1067	melanin-concentrating hormone receptor 2	gi|405970654|gb|EKC35542.1|hypothetical protein CGI_10005167 [Crassostrea gigas]	EKC35542	1.87044e-48	62
contig_1054	1061	Deoxyribonuclease-2-alpha	gi|355703201|gb|EHH29692.1|Deoxyribonuclease-2-alpha [Macaca mulatta]	EHH29692	26.0161	57
contig_5379	1059	sequestosome-1 isoform x1	gi|405953699|gb|EKC21311.1|Sequestosome-1 [Crassostrea gigas]	EKC21311	9.54653e-13	85
contig_770	1057	agglutinin hpa-like protein	gi|512203443|gb|EPE32267.1|Agglutinin HPA-like protein [Glarea lozoyensis ATCC 20868]	EPE32267	0.188353	62
contig_6236	1057	predicted protein	gi|195998710|ref|XP_002109223.1|predicted protein [Trichoplax adhaerens] >gi|190587347|gb|EDV27389.1| predicted protein [Trichoplax adhaerens]	XP_002109223	1.70357	51
contig_9417	1057	voltage-dependent anion-selective channel protein 2-like	gi|432903476|ref|XP_004077149.1|PREDICTED: voltage-dependent anion-selective channel protein 2-like [Oryzias latipes]	XP_004077149	1.32109e-09	83
contig_4235	1056	btb poz domain-containing protein 2	gi|405967138|gb|EKC32338.1|BTB/POZ domain-containing protein 6 [Crassostrea gigas]	EKC32338	3.41705e-18	59
contig_5985	1055	collagen alpha-1 chain	gi|405960914|gb|EKC26784.1|hypothetical protein CGI_10013214 [Crassostrea gigas]	EKC26784	2.10568e-28	49
contig_3876	1051	astacin-like squid metalloprotease type i	gi|405951909|gb|EKC19778.1|Meprin A subunit beta [Crassostrea gigas]	EKC19778	1.48868e-11	67
contig_3486	1048	c1q domain containing protein 1q6	gi|325504311|emb|CBX41655.1|putative C1q domain containing protein MgC1q6 [Mytilus galloprovincialis]	CBX41655	5.68981e-12	100
contig_5122	1041	cathepsin l	gi|326501772|dbj|BAK02675.1|predicted protein [Hordeum vulgare subsp. vulgare]	BAK02675	0.000156939	91
contig_8216	1039	hypothetical protein CGI_10020761	gi|405965836|gb|EKC31185.1|hypothetical protein CGI_10020761 [Crassostrea gigas]	EKC31185	3.77645e-14	83
contig_4833	1036	rna-binding protein 24-a	gi|405963050|gb|EKC28659.1|RNA-binding protein 24-A [Crassostrea gigas]	EKC28659	0.00435096	62
contig_9049	1036	proline racemase	gi|405958633|gb|EKC24742.1|Putative proline racemase [Crassostrea gigas]	EKC24742	2.77951e-51	69
contig_2486	1035	tm2 domain-containing protein 3 isoform x2	gi|241781515|ref|XP_002400280.1|TM2 domain-containing protein, putative [Ixodes scapularis] >gi|215510711|gb|EEC20164.1| TM2 domain-containing protein, putative [Ixodes scapularis]	XP_002400280	0.0195706	71
contig_6727	1035	dopamine beta-hydroxylase	gi|524903176|ref|XP_005107800.1|PREDICTED: tyramine beta-hydroxylase-like [Aplysia californica]	XP_005107800	1.01659e-09	68
contig_10944	1031	hypothetical protein CGI_10006869	gi|405967242|gb|EKC32426.1|hypothetical protein CGI_10006869 [Crassostrea gigas]	EKC32426	0.000356101	53
contig_348	1027	fbox domain containing protein	gi|405963369|gb|EKC28948.1|hypothetical protein CGI_10012792 [Crassostrea gigas]	EKC28948	3.58129e-87	76
contig_3709	1026	u4 tri-snrnp-associated protein 2-like	gi|524882908|ref|XP_005098090.1|PREDICTED: U4/U6.U5 tri-snRNP-associated protein 2-like [Aplysia californica]	XP_005098090	1.17858e-23	91
contig_2520	1024	pdgf- and vegf-related factor 1-like precursor	gi|405950742|gb|EKC18709.1|Vascular endothelial growth factor D [Crassostrea gigas]	EKC18709	4.26329e-12	62
contig_2325	1020	tubulin beta-2c chain	gi|162138821|dbj|BAF95186.1|beta-tubulin [Pinctada fucata]	BAF95186	2.23344e-87	100
contig_4662	1019	hypothetical protein BRAFLDRAFT_125733	gi|260791589|ref|XP_002590811.1|hypothetical protein BRAFLDRAFT_125733 [Branchiostoma floridae] >gi|229276008|gb|EEN46822.1| hypothetical protein BRAFLDRAFT_125733 [Branchiostoma floridae]	XP_002590811	2.07261e-32	54
contig_8142	1019	fibrinogen c domain-containing protein 1-like	gi|260830599|ref|XP_002610248.1|hypothetical protein BRAFLDRAFT_92969 [Branchiostoma floridae] >gi|229295612|gb|EEN66258.1| hypothetical protein BRAFLDRAFT_92969 [Branchiostoma floridae]	XP_002610248	4.84607e-08	78
contig_814	1015	hypothetical protein CGI_10024338	gi|405971073|gb|EKC35929.1|hypothetical protein CGI_10024338 [Crassostrea gigas]	EKC35929	1.03501e-45	64
contig_5175	1012	c1q domain containing protein 1q13	gi|325504325|emb|CBX41662.1|putative C1q domain containing protein MgC1q13 [Mytilus galloprovincialis]	CBX41662	1.84906e-19	98
contig_174	1010	pol-like protein	gi|125901787|gb|ABN58714.1|pol-like protein [Biomphalaria glabrata]	ABN58714	1.28493	68
contig_5936	1006	pab-dependent poly -specific ribonuclease subunit 2-like	gi|405952329|gb|EKC20153.1|PAB-dependent poly(A)-specific ribonuclease subunit 2 [Crassostrea gigas]	EKC20153	2.42203e-40	89
contig_8259	1002	low quality protein: ovochymase-1	gi|195969601|gb|ACG60643.1|serine protease [Pinctada fucata]	ACG60643	1.21593e-25	77
contig_1747	999	collagen alpha-1 chain	gi|405975735|gb|EKC40283.1|Collagen alpha-5(VI) chain [Crassostrea gigas]	EKC40283	1.87621e-27	62
contig_6123	998	collagen alpha-6 chain	gi|524892586|ref|XP_005102820.1|PREDICTED: uncharacterized protein LOC101848762 [Aplysia californica]	XP_005102820	1.51942e-25	58
contig_5146	995	-like protein subfamily b member 5	gi|524899984|ref|XP_005106417.1|PREDICTED: uncharacterized protein LOC101850592 [Aplysia californica]	XP_005106417	0.000190585	66
contig_137	994	ino80 complex subunit c-like	gi|443718433|gb|ELU09067.1|hypothetical protein CAPTEDRAFT_121867, partial [Capitella teleta]	ELU09067	1.23608e-06	88
contig_2348	988	steroid 17-alpha-hydroxylase lyase-like	gi|405950231|gb|EKC18231.1|Cytochrome P450 2D14 [Crassostrea gigas]	EKC18231	2.57632e-09	72
contig_4072	985	prolyl-trna editing prox domain protein	gi|524911050|ref|XP_005110396.1|PREDICTED: uncharacterized protein LOC101864342 [Aplysia californica]	XP_005110396	1.46831e-13	59
contig_4308	978	jagged 1-like	gi|405963544|gb|EKC29108.1|hypothetical protein CGI_10019746 [Crassostrea gigas]	EKC29108	1.30388e-17	75
contig_4037	977	collagen alpha-6 chain	gi|405958346|gb|EKC24482.1|Collagen alpha-6(VI) chain [Crassostrea gigas]	EKC24482	1.44472e-51	77
contig_1540	975	beta- -galactosyltransferase brn	gi|405975999|gb|EKC40524.1|Beta-1,3-galactosyltransferase brn [Crassostrea gigas]	EKC40524	6.66565e-33	57
contig_13715	974	60s ribosomal protein l4	gi|385682599|gb|AFI71065.1|60S ribosomal protein, partial [Pomatoschistus minutus]	AFI71065	8.47141e-15	83
contig_1987	973	mesenchyme-specific cell surface glycoprotein	gi|405953527|gb|EKC21174.1|Mesenchyme-specific cell surface glycoprotein [Crassostrea gigas]	EKC21174	9.13378e-05	61
contig_3276	971	complement c1q-like protein 4	gi|325504407|emb|CBX41703.1|putative C1q domain containing protein MgC1q54 [Mytilus galloprovincialis]	CBX41703	5.11205e-88	97
contig_1199	970	heat shock protein 70	gi|289186801|gb|ADC91992.1|heat shock protein 70 [Perna indica]	ADC91992	6.70359e-60	99
contig_6865	967	26s protease regulatory subunit 7	gi|312380668|gb|EFR26600.1|hypothetical protein AND_07217 [Anopheles darlingi]	EFR26600	1.35638e-23	91
contig_2251	963	actin	gi|18565104|dbj|BAB84579.1|Actin 2 [Crassostrea gigas] >gi|405966634|gb|EKC31894.1| Actin, adductor muscle [Crassostrea gigas]	BAB84579	0.0	100
contig_9690	963	glyoxylate reductase hydroxypyruvate reductase	gi|390361171|ref|XP_793131.2|PREDICTED: glyoxylate reductase/hydroxypyruvate reductase-like isoform 2 [Strongylocentrotus purpuratus]	XP_793131	9.65966e-15	67
contig_416	962	-like protein subfamily b member 5	gi|405972284|gb|EKC37060.1|hypothetical protein CGI_10018796 [Crassostrea gigas]	EKC37060	1.4627e-10	73
contig_6093	962	gamma-secretase subunit aph-1a isoform 2	gi|387598141|gb|AFJ91726.1|anterior pharynx defective 1, partial [Ostrea edulis]	AFJ91726	3.8282e-07	81
contig_13084	962	camp-dependent protein kinase type i-alpha regulatory subunit	gi|325297146|ref|NP_001191582.1|cAMP-dependent protein kinase regulatory subunit [Aplysia californica] >gi|400119|sp|P31319.2|KAPR_APLCA RecName: Full=cAMP-dependent protein kinase regulatory subunit; AltName: Full=N4 subunit of protein kinase A >gi|5588|emb|CAA44246.1| type N4 regulatory subunit of protein kinase A [Aplysia californica]	NP_001191582	4.72652e-08	86
contig_7457	959	e3 ubiquitin-protein ligase uhrf1	gi|405976241|gb|EKC40754.1|E3 ubiquitin-protein ligase UHRF1 [Crassostrea gigas]	EKC40754	8.38287e-10	82
contig_3548	958	cholecystokinin receptor	gi|405975570|gb|EKC40128.1|Cholecystokinin receptor type A [Crassostrea gigas]	EKC40128	8.91776e-17	64
contig_3771	958	fibrinogen and fibronectin	gi|170045163|ref|XP_001850188.1|fibrinogen and fibronectin [Culex quinquefasciatus] >gi|167868169|gb|EDS31552.1| fibrinogen and fibronectin [Culex quinquefasciatus]	XP_001850188	0.00094247	65
contig_6700	954	dna-directed rna polymerase ii subunit rpb3	gi|149032428|gb|EDL87319.1|polymerase (RNA) II (DNA directed) polypeptide C, isoform CRA_d [Rattus norvegicus]	EDL87319	3.93497e-09	91
contig_1271	951	peptidase m20 domain-containing protein 2-like	gi|443686494|gb|ELT89752.1|hypothetical protein CAPTEDRAFT_190092 [Capitella teleta]	ELT89752	2.13599e-23	76
contig_2631	951	fibrinogen-related protein	gi|317453197|emb|CBM41044.1|fibrinogen-related protein 5 [Mytilus galloprovincialis]	CBM41044	1.76431e-21	100
contig_12553	951	c3 and pzp-like alpha-2-macroglobulin domain-containing protein 8	gi|290796194|gb|ADD64826.1|CTL-6 [Argopecten irradians]	ADD64826	2.61447e-17	81
contig_3339	950	dbh-like monooxygenase protein 1-like protein	gi|310706686|gb|ADP08787.1|dopamine beta hydroxylase [Azumapecten farreri]	ADP08787	8.26902e-05	70
contig_5359	943	hypothetical protein AOL_s00081g190	gi|345564907|gb|EGX47863.1|hypothetical protein AOL_s00081g190 [Arthrobotrys oligospora ATCC 24927]	EGX47863	0.772768	59
contig_4555	942	Astacin	gi|405978762|gb|EKC43126.1|Astacin [Crassostrea gigas]	EKC43126	3.00292e-14	77
contig_8447	940	rcc1 domain-containing protein 1-like	gi|348506010|ref|XP_003440553.1|PREDICTED: RCC1 domain-containing protein 1-like [Oreochromis niloticus]	XP_003440553	0.490973	43
contig_9185	940	pancreatic triacylglycerol lipase-like	gi|405966881|gb|EKC32113.1|Pancreatic lipase-related protein 1 [Crassostrea gigas]	EKC32113	4.44017e-15	63
contig_854	938	swi snf complex subunit smarcc2	gi|405964075|gb|EKC29597.1|SWI/SNF complex subunit SMARCC2 [Crassostrea gigas]	EKC29597	3.68585e-20	95
contig_7745	938	trna 2 -phosphotransferase 1 isoform x4	gi|529012545|ref|XP_005227108.1|PREDICTED: tRNA 2'-phosphotransferase 1 isoform X4 [Bos taurus]	XP_005227108	0.26435	72
contig_3813	932	lysozyme 2	gi|148524900|dbj|BAF63423.1|lysozyme 2 [Mytilus galloprovincialis]	BAF63423	3.42361e-10	100
contig_8260	927	ubiquitin-associated domain-containing protein 1	gi|405970336|gb|EKC35250.1|Ubiquitin-associated domain-containing protein 1 [Crassostrea gigas]	EKC35250	8.07513e-23	88
contig_6762	924	hypothetical protein BRAFLDRAFT_80549	gi|260805140|ref|XP_002597445.1|hypothetical protein BRAFLDRAFT_80549 [Branchiostoma floridae] >gi|229282710|gb|EEN53457.1| hypothetical protein BRAFLDRAFT_80549 [Branchiostoma floridae]	XP_002597445	7.1663e-09	67
contig_9405	924	protein kinase c alpha type-like	gi|228058|prf||1716374Aprotein kinase C I	1716374A	3.1201e-09	97
contig_4140	923	amy-1-associating protein expressed in testis 1 isoform 3	gi|405959166|gb|EKC25228.1|AMY-1-associating protein expressed in testis 1 [Crassostrea gigas]	EKC25228	3.49625e-17	96
contig_1919	922	fibrinogen-related protein	gi|317453191|emb|CBM41041.1|fibrinogen-related protein 2 [Mytilus galloprovincialis]	CBM41041	2.19203e-46	100
contig_6021	921	hypothetical protein CGI_10006614	gi|405957766|gb|EKC23952.1|hypothetical protein CGI_10006614 [Crassostrea gigas]	EKC23952	0.000478383	76
contig_377	918	lix1-like protein	gi|443688988|gb|ELT91510.1|hypothetical protein CAPTEDRAFT_172058 [Capitella teleta]	ELT91510	1.83147e-22	86
contig_4750	917	carbonyl reductase	gi|471415957|ref|XP_004389503.1|PREDICTED: carbonyl reductase [NADPH] 1 [Trichechus manatus latirostris]	XP_004389503	5.00178e-14	77
contig_5787	913	histone acetyltransferase kat8-like	gi|405963432|gb|EKC29006.1|Putative histone acetyltransferase MYST1 [Crassostrea gigas]	EKC29006	7.48615e-14	86
contig_208	905	beta tubulin 3	gi|1518676|gb|AAB09476.1|beta tubulin, partial [Montastraea faveolata]	AAB09476	8.70955e-79	96
contig_678	904	alpha partial	gi|38047815|gb|AAR09810.1|similar to Drosophila melanogaster alphaTub84B, partial [Drosophila yakuba]	AAR09810	2.14485e-122	99
contig_3657	901	collagen	gi|262233854|gb|ACY38932.1|collagen [Bathymodiolus thermophilus]	ACY38932	1.05914e-34	86
contig_3794	901	40s ribosomal protein sa	gi|405976088|gb|EKC40608.1|40S ribosomal protein SA [Crassostrea gigas]	EKC40608	1.45021e-21	98
contig_5814	899	alpha tubulin	gi|340536244|gb|AEK48259.1|alpha-tubulin [Cochliomyia hominivorax]	AEK48259	6.64933e-19	100
contig_207	896	beta tubulin	gi|205345215|dbj|BAG71387.1|beta tubulin [Ctenella chagius]	BAG71387	1.32696e-67	96
contig_1124	895	beta-ig-h3 fasciclin	gi|405960569|gb|EKC26483.1|Transforming growth factor-beta-induced protein ig-h3 [Crassostrea gigas]	EKC26483	9.43597e-12	77
contig_5508	895	yth domain family protein 2	gi|291238118|ref|XP_002738978.1|PREDICTED: CG6422-like [Saccoglossus kowalevskii]	XP_002738978	6.58023e-106	93
contig_7392	892	jagged 1-like	gi|405969398|gb|EKC34371.1|Protein jagged-2 [Crassostrea gigas]	EKC34371	2.60928e-19	65
contig_5229	890	hypothetical protein CGI_10007261	gi|405952065|gb|EKC19918.1|hypothetical protein CGI_10007261 [Crassostrea gigas]	EKC19918	0.0353574	60
contig_13501	889	predicted protein	gi|156376356|ref|XP_001630327.1|predicted protein [Nematostella vectensis] >gi|156217345|gb|EDO38264.1| predicted protein [Nematostella vectensis]	XP_001630327	0.00487652	64
contig_10244	888	hypothetical protein CGI_10007481	gi|405951959|gb|EKC19823.1|hypothetical protein CGI_10007481 [Crassostrea gigas]	EKC19823	5.78944	80
contig_1521	886	hypothetical protein CGI_10026724	gi|405974301|gb|EKC38957.1|hypothetical protein CGI_10026724 [Crassostrea gigas]	EKC38957	1.94899e-17	59
contig_1097	878	actin	gi|313212822|emb|CBY36739.1|unnamed protein product [Oikopleura dioica] >gi|313234894|emb|CBY24839.1| unnamed protein product [Oikopleura dioica] >gi|313243312|emb|CBY39942.1| unnamed protein product [Oikopleura dioica]	CBY36739	0.0	99
contig_3835	878	vitelline membrane outer layer protein 1-like	gi|327269104|ref|XP_003219335.1|PREDICTED: vitelline membrane outer layer protein 1-like [Anolis carolinensis]	XP_003219335	5.21512	55
contig_9763	877	fact complex subunit spt16-like	gi|524892209|ref|XP_005102634.1|PREDICTED: FACT complex subunit SPT16-like [Aplysia californica]	XP_005102634	2.19662e-11	92
contig_4834	876	rna-binding protein 24-a	gi|405963050|gb|EKC28659.1|RNA-binding protein 24-A [Crassostrea gigas]	EKC28659	0.00279444	62
contig_6499	873	peptidyl-prolyl cis-trans isomerase g	gi|260814910|ref|XP_002602156.1|hypothetical protein BRAFLDRAFT_234322 [Branchiostoma floridae] >gi|229287463|gb|EEN58168.1| hypothetical protein BRAFLDRAFT_234322 [Branchiostoma floridae]	XP_002602156	0.000724183	75
contig_1010	871	chitinase 3	gi|405952541|gb|EKC20339.1|Chitotriosidase-1 [Crassostrea gigas]	EKC20339	1.39151e-25	77
contig_1513	871	polyamine-modulated factor 1-binding protein 1	gi|405975722|gb|EKC40270.1|Polyamine-modulated factor 1-binding protein 1 [Crassostrea gigas]	EKC40270	5.8195e-07	85
contig_11328	871	mesenchyme-specific cell surface glycoprotein	gi|405953527|gb|EKC21174.1|Mesenchyme-specific cell surface glycoprotein [Crassostrea gigas]	EKC21174	5.39377e-05	68
contig_1768	867	26s proteasome non-atpase regulatory subunit 7-like	gi|483505105|gb|EOA96852.1|26S proteasome non-ATPase regulatory subunit 7, partial [Anas platyrhynchos]	EOA96852	3.10961e-06	91
contig_1937	865	coronin-1c-like isoform 1	gi|383851504|ref|XP_003701272.1|PREDICTED: coronin-6-like [Megachile rotundata]	XP_003701272	1.41539e-11	80
contig_1105	863	cytoplasmic 1-like	gi|270208896|gb|ACZ63697.1|beta actin, partial [Hippoglossus hippoglossus]	ACZ63697	0.0	98
contig_1821	863	carcinolectin 5a isoform	gi|317453197|emb|CBM41044.1|fibrinogen-related protein 5 [Mytilus galloprovincialis]	CBM41044	1.2562e-35	89
contig_10986	859	dyp-type peroxidase	gi|405970525|gb|EKC35421.1|Uncharacterized protein yfeX [Crassostrea gigas]	EKC35421	4.80086e-18	66
contig_974	858	elongation factor 1 alpha	gi|308387033|dbj|BAJ22802.1|elongation factor-1 alpha, partial [Anguilla japonica]	BAJ22802	2.23398e-23	98
contig_7967	858	arylsulfatase b-like	gi|405975641|gb|EKC40195.1|Arylsulfatase B [Crassostrea gigas]	EKC40195	7.09289e-05	89
contig_2543	857	neuralized pats1	gi|260784889|ref|XP_002587496.1|hypothetical protein BRAFLDRAFT_129004 [Branchiostoma floridae] >gi|229272644|gb|EEN43507.1| hypothetical protein BRAFLDRAFT_129004 [Branchiostoma floridae]	XP_002587496	0.0140867	48
contig_2551	857	c1q domain containing protein 1q55	gi|325504409|emb|CBX41704.1|putative C1q domain containing protein MgC1q55 [Mytilus galloprovincialis]	CBX41704	1.27759e-15	88
contig_3489	857	ankyrin repeat and socs box protein 16	gi|405961375|gb|EKC27186.1|Ankyrin repeat and SOCS box protein 16 [Crassostrea gigas]	EKC27186	3.6365e-10	74
contig_6450	856	universal stress protein a-like protein	gi|405970590|gb|EKC35483.1|hypothetical protein CGI_10022387 [Crassostrea gigas]	EKC35483	4.57459e-05	89
contig_1032	855	myosin vi	gi|405959253|gb|EKC25309.1|Myosin-VI [Crassostrea gigas]	EKC25309	1.00245e-26	97
contig_9759	853	hypothetical protein CGI_10024338	gi|405971073|gb|EKC35929.1|hypothetical protein CGI_10024338 [Crassostrea gigas]	EKC35929	1.85254e-22	75
contig_8549	845	fibrinogen-related protein	gi|312270833|gb|ADQ55813.1|fibrinogen-related protein [Mytilus galloprovincialis]	ADQ55813	1.22729e-15	69
contig_677	844	tubulin alpha-1a chain-like	gi|470643071|ref|XP_004326123.1|PREDICTED: tubulin alpha-1C chain-like [Tursiops truncatus]	XP_004326123	1.67389e-114	100
contig_9299	844	histone acetyltransferase myst1	gi|405963432|gb|EKC29006.1|Putative histone acetyltransferase MYST1 [Crassostrea gigas]	EKC29006	5.51755e-12	91
contig_10176	844	stearoyl- desaturase	gi|530583570|ref|XP_005285610.1|PREDICTED: acyl-CoA desaturase-like [Chrysemys picta bellii]	XP_005285610	1.54824e-61	79
contig_4810	840	protein mom-5	gi|341898371|gb|EGT54306.1|hypothetical protein CAEBREN_12860 [Caenorhabditis brenneri]	EGT54306	1.0675e-12	54
contig_3576	839	armadillo repeat-containing protein 1	gi|405950859|gb|EKC18818.1|Armadillo repeat-containing protein 1 [Crassostrea gigas]	EKC18818	2.48373e-14	85
contig_3850	836	catenin beta	gi|405973481|gb|EKC38193.1|Catenin beta [Crassostrea gigas]	EKC38193	8.88211e-05	81
contig_5196	832	mesenchyme-specific cell surface glycoprotein	gi|405953526|gb|EKC21173.1|Calcium and integrin-binding family member 2 [Crassostrea gigas]	EKC21173	3.3199e-12	68
contig_2936	829	leucine-rich repeat-containing protein 61-like	gi|405952276|gb|EKC20107.1|Leucine-rich repeat-containing protein 61 [Crassostrea gigas]	EKC20107	2.60671e-07	85
contig_6302	829	mammalian ependymin-related protein 1	gi|405957183|gb|EKC23413.1|Mammalian ependymin-related protein 1 [Crassostrea gigas]	EKC23413	16.4826	67
contig_1771	828	hypothetical protein CAPTEDRAFT_223578	gi|443718498|gb|ELU09101.1|hypothetical protein CAPTEDRAFT_223578 [Capitella teleta]	ELU09101	53.9861	64
contig_6688	826	trim56 protein	gi|405958433|gb|EKC24561.1|Tripartite motif-containing protein 56 [Crassostrea gigas]	EKC24561	8.37315e-136	92
contig_5626	825	4-coumarate-- ligase-like 7-like	gi|405967713|gb|EKC32846.1|4-coumarate--CoA ligase [Crassostrea gigas]	EKC32846	4.62677e-15	85
contig_6810	825	dna polymerase theta	gi|405950373|gb|EKC18366.1|DNA polymerase theta [Crassostrea gigas]	EKC18366	1.05421e-05	89
contig_1198	822	heat shock protein 70	gi|289186801|gb|ADC91992.1|heat shock protein 70 [Perna indica]	ADC91992	7.19949e-17	85
contig_3826	822	c1q domain containing protein 1q45	gi|325504389|emb|CBX41694.1|putative C1q domain containing protein MgC1q45 [Mytilus galloprovincialis]	CBX41694	2.16178e-44	92
contig_8527	822	organic cation transporter protein	gi|405954357|gb|EKC21821.1|Organic cation transporter protein [Crassostrea gigas]	EKC21821	7.62197e-08	73
contig_159	821	serine threonine-protein kinase pats1	gi|405964135|gb|EKC29652.1|Putative serine/threonine-protein kinase pats1 [Crassostrea gigas]	EKC29652	3.71184	46
contig_1879	820	tubulin beta chain variant 1	gi|1162984|gb|AAA85473.1|beta-1 tubulin, partial [Lytechinus pictus]	AAA85473	7.90881e-30	100
contig_5777	820	probable e3 ubiquitin-protein ligase mycbp2-like	gi|405977192|gb|EKC41654.1|Putative E3 ubiquitin-protein ligase MYCBP2 [Crassostrea gigas]	EKC41654	1.2895e-51	83
contig_6824	819	carboxypeptidase a1-like	gi|115938098|ref|XP_794139.2|PREDICTED: carboxypeptidase A1-like [Strongylocentrotus purpuratus]	XP_794139	4.24993	50
contig_3592	818	sulfotransferase family cytosolic 1b member 1	gi|524898400|ref|XP_005105649.1|PREDICTED: sulfotransferase family cytosolic 1B member 1-like [Aplysia californica]	XP_005105649	0.0852682	49
contig_2	817	eftud2 protein	gi|125901786|gb|ABN58713.1|gag-like protein [Biomphalaria glabrata]	ABN58713	3.59688e-16	50
contig_9	817	gag-like protein	gi|125901786|gb|ABN58713.1|gag-like protein [Biomphalaria glabrata]	ABN58713	1.73869e-33	59
contig_2093	817	protein slit-like	gi|524877005|ref|XP_005095210.1|PREDICTED: slit homolog 2 protein-like [Aplysia californica]	XP_005095210	0.00358527	44
contig_3540	814	linker histone h1m	gi|405966341|gb|EKC31637.1|Histone H1oo [Crassostrea gigas]	EKC31637	6.64586e-07	73
contig_6543	814	scavenger receptor cysteine-rich domain-containing group b protein	gi|405968561|gb|EKC33624.1|hypothetical protein CGI_10016482 [Crassostrea gigas]	EKC33624	4.81057e-39	64
contig_5776	813	probable e3 ubiquitin-protein ligase mycbp2-like	gi|405977192|gb|EKC41654.1|Putative E3 ubiquitin-protein ligase MYCBP2 [Crassostrea gigas]	EKC41654	1.20832e-50	83
contig_11489	811	dolichyl-diphosphooligosaccharide--protein glycosyltransferase subunit 1	gi|90018186|gb|ABD83906.1|ribophorin I [Ictalurus punctatus]	ABD83906	4.90508e-06	80
contig_211	810	nucleoside diphosphate kinase	gi|405978782|gb|EKC43144.1|Nucleoside diphosphate kinase B [Crassostrea gigas]	EKC43144	1.50724e-07	79
contig_2773	808	-like protein subfamily b member 5	gi|405972284|gb|EKC37060.1|hypothetical protein CGI_10018796 [Crassostrea gigas]	EKC37060	7.27805e-07	74
contig_8103	808	proteasome subunit beta type-4 precursor	gi|65024|emb|CAA44593.1|proteasome beta subunit [Xenopus laevis]	CAA44593	0.831877	68
contig_3757	807	dbh-like monooxygenase protein 1	gi|405978197|gb|EKC42607.1|DBH-like monooxygenase protein 1 [Crassostrea gigas]	EKC42607	7.76913e-07	53
contig_255	804	fibrinogen-related protein	gi|312270829|gb|ADQ55811.1|fibrinogen-related protein [Mytilus galloprovincialis]	ADQ55811	8.16915e-39	93
contig_3943	803	myticin c	gi|6647599|sp|P82103.1|MYNA_MYTGARecName: Full=Myticin-A; Flags: Precursor >gi|5712761|gb|AAD47638.1|AF162334_1 antimicrobial peptide precursor myticin A [Mytilus galloprovincialis]	P82103	1.56918e-19	100
contig_5200	803	nadh dehydrogenase subunit 5	gi|162945300|gb|ABY20700.1|NADH dehydrogenase subunit 5 [Mytilus trossulus]	ABY20700	3.05482e-89	92
contig_2815	802	60 kda ss-a ro ribonucleoprotein	gi|405974979|gb|EKC39582.1|60 kDa SS-A/Ro ribonucleoprotein [Crassostrea gigas]	EKC39582	1.2407e-36	57
contig_2842	802	tyrosine-protein phosphatase non-receptor type 6	gi|405957445|gb|EKC23654.1|Tyrosine-protein phosphatase non-receptor type 6 [Crassostrea gigas]	EKC23654	0.0262887	65
contig_8232	802	drebrin-like protein	gi|196013332|ref|XP_002116527.1|hypothetical protein TRIADDRAFT_31115 [Trichoplax adhaerens] >gi|190580803|gb|EDV20883.1| hypothetical protein TRIADDRAFT_31115 [Trichoplax adhaerens]	XP_002116527	0.0108448	72
contig_14213	802	e3 ubiquitin-protein ligase ubr3	gi|405957399|gb|EKC23612.1|E3 ubiquitin-protein ligase UBR3 [Crassostrea gigas]	EKC23612	8.74594e-19	86
contig_5631	801	fibrinogen-related protein	gi|319803017|tpg|DAA34039.1|TPA_inf: fibrinogen-related protein 7 [Mytilus californianus]	DAA34039	9.85205e-14	69
contig_5806	801	reverse partial	gi|449679412|ref|XP_004209322.1|PREDICTED: uncharacterized protein LOC101235370 [Hydra magnipapillata]	XP_004209322	8.27594e-08	46
contig_3190	798	c1q domain containing protein 1q40	gi|325504379|emb|CBX41689.1|putative C1q domain containing protein MgC1q40 [Mytilus galloprovincialis]	CBX41689	2.75775e-12	95
contig_647	797	rna-directed dna polymerase from mobile element jockey-like	gi|390362754|ref|XP_003730218.1|PREDICTED: uncharacterized protein LOC100889850 [Strongylocentrotus purpuratus]	XP_003730218	9.07284e-21	64
contig_1558	795	nhl repeat containing protein	gi|260792730|ref|XP_002591367.1|hypothetical protein BRAFLDRAFT_93988 [Branchiostoma floridae] >gi|229276572|gb|EEN47378.1| hypothetical protein BRAFLDRAFT_93988 [Branchiostoma floridae]	XP_002591367	1.3556e-07	51
contig_9729	792	beta-glucan recognition protein	gi|32442368|gb|AAP82240.1|lipopolysaccharide- and beta-1,3-glucan-binding protein [Azumapecten farreri]	AAP82240	1.1804e-19	86
contig_1227	790	phospholipase a2 isozymes pa3a pa3b pa5	gi|405976549|gb|EKC41051.1|Phospholipase A2 isozymes PA3A/PA3B/PA5 [Crassostrea gigas]	EKC41051	0.00707353	60
contig_4507	789	carbonyl reductase	gi|524877737|ref|XP_005095566.1|PREDICTED: carbonyl reductase [NADPH] 1-like isoform X1 [Aplysia californica] >gi|524877739|ref|XP_005095567.1| PREDICTED: carbonyl reductase [NADPH] 1-like isoform X2 [Aplysia californica]	XP_005095566	2.63676e-08	78
contig_5687	789	heat shock protein 90	gi|205362524|emb|CAJ85741.1|heat shock protein 90 [Mytilus galloprovincialis] >gi|205362632|emb|CAE52893.2| heat shock protein 90 [Mytilus galloprovincialis]	CAJ85741	1.16782e-05	100
contig_96	787	cytoplasmic actin	gi|26522944|dbj|BAC44869.1|actin [Favites chinensis]	BAC44869	4.01654e-163	97
contig_2962	786	methionine adenosyltransferase 2 subunit beta	gi|260832866|ref|XP_002611378.1|hypothetical protein BRAFLDRAFT_73226 [Branchiostoma floridae] >gi|229296749|gb|EEN67388.1| hypothetical protein BRAFLDRAFT_73226 [Branchiostoma floridae]	XP_002611378	7.55749e-21	75
contig_6424	779	c-type lectin domain family 4 member m-like	gi|348526258|ref|XP_003450637.1|PREDICTED: C-type lectin domain family 4 member M-like [Oreochromis niloticus]	XP_003450637	39.0015	51
contig_3770	778	elongation factor 2	gi|405967652|gb|EKC32788.1|hypothetical protein CGI_10017178 [Crassostrea gigas]	EKC32788	2.45485e-48	88
contig_3475	777	c1q domain containing protein 1q15	gi|325504329|emb|CBX41664.1|putative C1q domain containing protein MgC1q15 [Mytilus galloprovincialis]	CBX41664	1.02916e-11	100
contig_5743	777	protein artemis	gi|405958776|gb|EKC24868.1|Protein artemis [Crassostrea gigas]	EKC24868	6.56734e-11	65
contig_6893	777	baculoviral iap repeat-containing protein 7-b	gi|405971608|gb|EKC36434.1|Apoptosis inhibitor IAP [Crassostrea gigas]	EKC36434	1.58402e-18	50
contig_1893	776	radial spoke head 1 homolog	gi|443697458|gb|ELT97934.1|hypothetical protein CAPTEDRAFT_173803 [Capitella teleta]	ELT97934	7.26422e-17	77
contig_969	774	unnamed protein product	gi|313244723|emb|CBY15442.1|unnamed protein product [Oikopleura dioica]	CBY15442	1.01295e-12	46
contig_4651	774	complement c1q-like protein 4	gi|343455237|gb|AEM36058.1|putative sialic acid binding lectin [Mytilus edulis]	AEM36058	8.88709e-09	60
contig_3407	772	hypothetical protein CAPTEDRAFT_218731	gi|443686980|gb|ELT90097.1|hypothetical protein CAPTEDRAFT_218731 [Capitella teleta]	ELT90097	1.05696	64
contig_7608	772	chitinase 1	gi|34526531|dbj|BAC85143.1|FLJ00314 protein [Homo sapiens]	BAC85143	0.000328057	80
contig_4385	770	s-formylglutathione hydrolase	gi|470459383|ref|XP_004341350.1|Sformylglutathione hydrolase [Acanthamoeba castellanii str. Neff] >gi|440798197|gb|ELR19265.1| Sformylglutathione hydrolase [Acanthamoeba castellanii str. Neff]	XP_004341350	1.23801e-17	98
contig_3131	768	hypothetical protein CGI_10009106	gi|405951331|gb|EKC19253.1|hypothetical protein CGI_10009106 [Crassostrea gigas]	EKC19253	3.20418e-25	59
contig_7315	767	upf0686 protein c11orf1 homolog	gi|405977198|gb|EKC41660.1|UPF0686 protein C11orf1-like protein [Crassostrea gigas]	EKC41660	3.3671e-21	82
contig_14275	767	death domain-associated protein 6	gi|405968752|gb|EKC33792.1|Death domain-associated protein 6 [Crassostrea gigas]	EKC33792	0.00650418	79
contig_3368	764	metaxin-2	gi|405978625|gb|EKC43002.1|Metaxin-2 [Crassostrea gigas]	EKC43002	7.7538e-36	78
contig_694	760	chitin synthase	gi|405957609|gb|EKC23809.1|Chitin synthase 1 [Crassostrea gigas]	EKC23809	3.56345e-17	84
contig_2092	760	protein slit-like	gi|524894548|ref|XP_005103771.1|PREDICTED: insulin-like growth factor-binding protein complex acid labile subunit-like [Aplysia californica]	XP_005103771	0.00534118	50
contig_1322	758	zygote arrest protein 1	gi|405963669|gb|EKC29225.1|Zygote arrest protein 1 [Crassostrea gigas]	EKC29225	1.52022e-15	78
contig_8938	758	dentin matrix acidic phosphoprotein 1-like	gi|524914195|ref|XP_005111916.1|PREDICTED: dentin matrix acidic phosphoprotein 1-like [Aplysia californica]	XP_005111916	0.076517	56
contig_2212	756	hypothetical protein BRAFLDRAFT_74506	gi|260808043|ref|XP_002598817.1|hypothetical protein BRAFLDRAFT_74506 [Branchiostoma floridae] >gi|229284092|gb|EEN54829.1| hypothetical protein BRAFLDRAFT_74506 [Branchiostoma floridae]	XP_002598817	6.78405e-18	61
contig_4897	755	microtubule-associated protein futsch-like	gi|524909361|ref|XP_005109728.1|PREDICTED: microtubule-associated protein futsch-like [Aplysia californica]	XP_005109728	1.72675e-06	60
contig_3655	754	creb-like transcription factor	gi|405977372|gb|EKC41829.1|Cyclic AMP-responsive element-binding protein 3-like protein 2 [Crassostrea gigas]	EKC41829	7.88996e-12	75
contig_7324	754	protein partial	gi|405963160|gb|EKC28758.1|hypothetical protein CGI_10005431 [Crassostrea gigas]	EKC28758	4.17706e-17	79
contig_1458	753	cytochrome c oxidase assembly protein mitochondrial-like isoform x2	gi|537138684|gb|ERE67260.1|cytochrome c oxidase assembly protein COX11 [Cricetulus griseus]	ERE67260	3.62073e-11	91
contig_4580	752	Uncharacterized protein C22orf9-like protein	gi|405978767|gb|EKC43130.1|Uncharacterized protein C22orf9-like protein [Crassostrea gigas]	EKC43130	0.172521	77
contig_6936	752	c1q domain containing protein 1q5	gi|325504309|emb|CBX41654.1|putative C1q domain containing protein MgC1q5 [Mytilus galloprovincialis]	CBX41654	1.87075e-80	96
contig_8986	752	hypothetical protein CGI_10011811	gi|405950586|gb|EKC18564.1|hypothetical protein CGI_10011811 [Crassostrea gigas]	EKC18564	5.37762e-07	82
contig_9603	752	tbc1 domain family member 22a	gi|4218033|gb|AAD12228.1|similar to Schizosaccharomyces pombe GTPase activating protein; similar to PID:3150248, PID:g3876566, PID:g2880048, and S66953 (PID:g2132046) [Homo sapiens]	AAD12228	2.75057e-10	89
contig_182	750	hypothetical protein Caci_4732	gi|256393870|ref|YP_003115434.1|hypothetical protein Caci_4732 [Catenulispora acidiphila DSM 44928] >gi|506273547|ref|WP_015793322.1| hypothetical protein [Catenulispora acidiphila] >gi|256360096|gb|ACU73593.1| protein of unknown function DUF182 [Catenulispora acidiphila DSM 44928]	YP_003115434	3.61255	50
contig_7397	750	apextrin-like protein	gi|339785142|gb|AEK10750.1|apextrin-like protein [Mytilus galloprovincialis]	AEK10750	2.98669e-11	79
contig_8330	749	dna polymerase delta subunit 2	gi|504139741|ref|XP_004582319.1|PREDICTED: DNA polymerase delta subunit 2 [Ochotona princeps]	XP_004582319	0.120674	68
contig_2893	748	c-binding protein	gi|405973533|gb|EKC38241.1|hypothetical protein CGI_10025740 [Crassostrea gigas]	EKC38241	0.00287739	59
contig_3494	747	acypi000079	gi|212374122|emb|CAQ63458.1|ribosomal protein [Mytilus galloprovincialis]	CAQ63458	4.98753e-08	70
contig_1891	746	tyrosyl-dna phosphodiesterase 2	gi|241913790|gb|ACS72243.1|TRAF and TNF receptor associated protein [Azumapecten farreri]	ACS72243	3.63662e-09	74
contig_11324	745	radial spoke head protein 9 homolog	gi|405959092|gb|EKC25160.1|Radial spoke head protein 9-like protein [Crassostrea gigas]	EKC25160	1.98814e-25	82
contig_13491	745	neurobeachin- partial	gi|443694890|gb|ELT95909.1|hypothetical protein CAPTEDRAFT_213205 [Capitella teleta]	ELT95909	1.63756e-12	100
contig_6644	745	cathepsin c	gi|82524663|ref|NP_001032336.1|cathepsin C precursor [Xenopus (Silurana) tropicalis] >gi|89273797|emb|CAJ82117.1| cathepsin C [Xenopus (Silurana) tropicalis]	NP_001032336	7.37478e-07	80
contig_6896	744	meteorin-like protein	gi|405952202|gb|EKC20042.1|Meteorin-like protein [Crassostrea gigas]	EKC20042	0.00116539	58
contig_5164	743	complement c1q-like protein 4	gi|325504491|emb|CBX41745.1|putative C1q domain containing protein MgC1q96 [Mytilus galloprovincialis]	CBX41745	4.67097e-62	81
contig_6	741	gag-like protein	gi|125901786|gb|ABN58713.1|gag-like protein [Biomphalaria glabrata]	ABN58713	1.59128e-15	60
contig_820	739	hypothetical protein CGI_10024338	gi|405971073|gb|EKC35929.1|hypothetical protein CGI_10024338 [Crassostrea gigas]	EKC35929	7.61154e-47	64
contig_5640	739	glutamyl-trna amidotransferase subunit mitochondrial-like	gi|524886064|ref|XP_005099631.1|PREDICTED: glutamyl-tRNA(Gln) amidotransferase subunit B, mitochondrial-like [Aplysia californica]	XP_005099631	1.43785e-07	79
contig_7937	737	coiled-coil domain-containing protein 47	gi|405966925|gb|EKC32152.1|Coiled-coil domain-containing protein 47 [Crassostrea gigas]	EKC32152	1.07372e-17	88
contig_3160	736	hypothetical protein CAPTEDRAFT_200258	gi|443721526|gb|ELU10817.1|hypothetical protein CAPTEDRAFT_200258 [Capitella teleta]	ELU10817	0.0169178	58
contig_389	736	ankyrin repeat domain-containing protein 54	gi|405959577|gb|EKC25597.1|Ankyrin repeat domain-containing protein 54 [Crassostrea gigas]	EKC25597	22.8454	57
contig_2475	735	transcription intermediary factor 1-beta	gi|260826253|ref|XP_002608080.1|hypothetical protein BRAFLDRAFT_91442 [Branchiostoma floridae] >gi|229293430|gb|EEN64090.1| hypothetical protein BRAFLDRAFT_91442 [Branchiostoma floridae]	XP_002608080	2.55529e-07	46
contig_5091	734	upf0686 protein c11orf1-like protein	gi|405977198|gb|EKC41660.1|UPF0686 protein C11orf1-like protein [Crassostrea gigas]	EKC41660	9.60554e-05	91
contig_7200	733	alsin	gi|405975788|gb|EKC40334.1|Alsin [Crassostrea gigas]	EKC40334	1.66343e-41	65
contig_5426	732	tyrosine aminotransferase	gi|380012139|ref|XP_003690145.1|PREDICTED: tyrosine aminotransferase-like [Apis florea]	XP_003690145	7.02149e-07	87
contig_1101	731	cytoplasmic actin	gi|1703112|sp|P53466.1|ACT2_LYTPIRecName: Full=Actin, cytoskeletal 2; AltName: Full=LPC2; Flags: Precursor >gi|520490|gb|AAA53364.1| cytoskeletal actin [Lytechinus pictus]	P53466	6.66609e-168	99
contig_13339	730	hypothetical protein CGI_10000046	gi|405948018|gb|EKC17918.1|hypothetical protein CGI_10000046 [Crassostrea gigas]	EKC17918	1.51939e-12	75
contig_8903	730	bro1 domain-containing protein brox	gi|524879418|ref|XP_005096385.1|PREDICTED: BRO1 domain-containing protein BROX-like [Aplysia californica]	XP_005096385	6.5442e-06	66
contig_5501	726	transcription activator	gi|390363969|ref|XP_003730490.1|PREDICTED: uncharacterized protein LOC100892956 [Strongylocentrotus purpuratus]	XP_003730490	0.00890241	61
contig_7	726	gag-like protein	gi|125901786|gb|ABN58713.1|gag-like protein [Biomphalaria glabrata]	ABN58713	8.1238e-09	53
contig_2351	725	interleukin-1 receptor-associated kinase 4	gi|405962053|gb|EKC27765.1|Interleukin-1 receptor-associated kinase 4 [Crassostrea gigas]	EKC27765	6.74471e-53	79
contig_2545	724	choline dehydrogenase	gi|405978092|gb|EKC42506.1|Choline dehydrogenase, mitochondrial [Crassostrea gigas]	EKC42506	2.03975e-06	85
contig_4695	719	haus augmin-like complex subunit 8	gi|405966413|gb|EKC31700.1|HAUS augmin-like complex subunit 8 [Crassostrea gigas]	EKC31700	9.8964	68
contig_3476	718	c1q domain containing protein 1q12	gi|325504323|emb|CBX41661.1|putative C1q domain containing protein MgC1q12 [Mytilus galloprovincialis]	CBX41661	5.92345e-12	87
contig_1848	717	atp-binding cassette sub-family b member mitochondrial	gi|527253274|ref|XP_005144930.1|PREDICTED: ATP-binding cassette sub-family B member 7, mitochondrial [Melopsittacus undulatus]	XP_005144930	6.70797e-09	81
contig_9085	716	vacuolar atpase assembly integral membrane protein partial	gi|443695064|gb|ELT96055.1|hypothetical protein CAPTEDRAFT_116613, partial [Capitella teleta]	ELT96055	7.39098e-05	85
contig_1201	714	vesicle-fusing atpase 1-like	gi|405951729|gb|EKC19617.1|Vesicle-fusing ATPase 1 [Crassostrea gigas]	EKC19617	1.91603e-10	88
contig_457	713	trypsin	gi|74275442|gb|ABA02192.1|elastase protein [Mytilus edulis]	ABA02192	1.63965e-16	69
contig_5922	713	flagellar associated protein	gi|455715029|gb|AGG36354.1|putative flagellar-associated protein, partial [Stylophora pistillata]	AGG36354	1.13317e-28	62
contig_11485	713	chromodomain-helicase-dna-binding protein 1-like	gi|537705559|dbj|BAN81885.1|chromodomain helicase DNA binding protein 1, partial [Anser cygnoides]	BAN81885	1.02194e-20	100
contig_5931	712	g patch domain-containing protein 3	gi|405963097|gb|EKC28701.1|G patch domain-containing protein 3 [Crassostrea gigas]	EKC28701	2.03912e-27	74
contig_5764	711	programmed cell death protein 4	gi|405965826|gb|EKC31180.1|Programmed cell death protein 4 [Crassostrea gigas]	EKC31180	1.6158e-08	86
contig_11695	708	brain-specific angiogenesis inhibitor 3 isoform x1	gi|524878827|ref|XP_005096095.1|PREDICTED: SCO-spondin-like [Aplysia californica]	XP_005096095	0.507257	61
contig_6157	708	anoctamin calcium activated chloride channel	gi|524896466|ref|XP_005104707.1|PREDICTED: anoctamin-4-like [Aplysia californica]	XP_005104707	1.01252e-10	87
contig_10718	704	gelsolin-like protein 2-like	gi|524887592|ref|XP_005100380.1|PREDICTED: gelsolin-like protein 2-like isoform X1 [Aplysia californica] >gi|524887594|ref|XP_005100381.1| PREDICTED: gelsolin-like protein 2-like isoform X2 [Aplysia californica] >gi|524887596|ref|XP_005100382.1| PREDICTED: gelsolin-like protein 2-like isoform X3 [Aplysia californica]	XP_005100380	0.0238771	89
contig_968	703	hypothetical protein CGI_10021533	gi|405976814|gb|EKC41298.1|hypothetical protein CGI_10021533 [Crassostrea gigas]	EKC41298	7.66795e-29	68
contig_10754	699	reverse transcriptase	gi|39652288|dbj|BAD04858.1|reverse transcriptase [Tetraodon nigroviridis]	BAD04858	0.769001	57
contig_1842	699	inversin	gi|405961122|gb|EKC26972.1|Inversin [Crassostrea gigas]	EKC26972	9.09645e-17	87
contig_3570	698	thap domain-containing protein 9	gi|405968106|gb|EKC33206.1|THAP domain-containing protein 9 [Crassostrea gigas]	EKC33206	0.00758855	54
contig_7348	696	stearoyl- desaturase 5	gi|405967090|gb|EKC32294.1|Acyl-CoA desaturase [Crassostrea gigas]	EKC32294	3.77302e-28	91
contig_8094	696	hypothetical protein CGI_10028666	gi|405976438|gb|EKC40944.1|hypothetical protein CGI_10028666 [Crassostrea gigas]	EKC40944	0.000441527	48
contig_3093	694	proteasome subunit beta type-6	gi|390338377|ref|XP_003724763.1|PREDICTED: proteasome subunit beta type-6-like [Strongylocentrotus purpuratus]	XP_003724763	0.0018148	83
contig_3919	693	bax inhibitor-1 protein	gi|485895571|gb|AGK88248.1|Bax inhibitor-1 protein [Mytilus galloprovincialis]	AGK88248	4.94885e-10	64
contig_6036	692	hypothetical protein EMIHUDRAFT_363053, partial	gi|485641125|gb|EOD35292.1|hypothetical protein EMIHUDRAFT_363053, partial [Emiliania huxleyi CCMP1516]	EOD35292	2.40454	64
contig_4829	691	complement c1q-like protein 4	gi|325504405|emb|CBX41702.1|putative C1q domain containing protein MgC1q53 [Mytilus galloprovincialis]	CBX41702	1.60998e-81	97
contig_287	690	nuclease harbi1-like	gi|291228639|ref|XP_002734285.1|PREDICTED: hypothetical protein [Saccoglossus kowalevskii]	XP_002734285	5.22542e-40	76
contig_9175	690	eukaryotic translation initiation factor 3 subunit a	gi|405970058|gb|EKC34993.1|Eukaryotic translation initiation factor 3 subunit A [Crassostrea gigas]	EKC34993	4.33184e-12	86
contig_3044	690	chromodomain-helicase-dna-binding protein mi-2-like protein	gi|405972247|gb|EKC37026.1|Chromodomain-helicase-DNA-binding protein Mi-2-like protein [Crassostrea gigas]	EKC37026	9.80036e-20	85
contig_819	689	short-chain collagen c4	gi|405971785|gb|EKC36598.1|hypothetical protein CGI_10018186 [Crassostrea gigas]	EKC36598	2.34857e-17	64
contig_3675	688	g patch domain-containing protein 3-like	gi|405963097|gb|EKC28701.1|G patch domain-containing protein 3 [Crassostrea gigas]	EKC28701	9.89792e-24	60
contig_2367	687	ribosome maturation protein sbds	gi|405976904|gb|EKC41382.1|Ribosome maturation protein SBDS [Crassostrea gigas]	EKC41382	2.53858e-09	84
contig_5218	686	fasciclin	gi|496321354|ref|WP_009030532.1|fasciclin [Bradyrhizobium sp. ORS 375] >gi|365287462|emb|CCD95622.1| conserved exported hypothetical protein [Bradyrhizobium sp. ORS 375]	WP_009030532	0.00918546	60
contig_2437	684	nucleoside diphosphate kinase	gi|225683570|gb|EEH21854.1|nucleoside diphosphate kinase [Paracoccidioides brasiliensis Pb03] >gi|226287191|gb|EEH42704.1| nucleoside diphosphate kinase [Paracoccidioides brasiliensis Pb18]	EEH21854	0.00614044	79
contig_13528	684	hypothetical protein CGI_10028582	gi|405965532|gb|EKC30901.1|hypothetical protein CGI_10028582 [Crassostrea gigas]	EKC30901	0.00680621	49
contig_2714	683	tyrosine aminotransferase	gi|524888986|ref|XP_005101056.1|PREDICTED: tyrosine aminotransferase-like [Aplysia californica]	XP_005101056	8.49437e-19	84
contig_1553	683	superoxide dismutase	gi|260802730|ref|XP_002596245.1|hypothetical protein BRAFLDRAFT_117980 [Branchiostoma floridae] >gi|229281499|gb|EEN52257.1| hypothetical protein BRAFLDRAFT_117980 [Branchiostoma floridae]	XP_002596245	1.7695e-25	80
contig_11433	683	protein fam49b-like isoform 2	gi|374675356|gb|AEZ56910.1|FAM49, partial [Branchiostoma belcheri]	AEZ56910	0.111693	82
contig_1376	682	multidrug resistance protein 1	gi|133711799|gb|ABO36618.1|multi-drug resistance protein [Mytilus galloprovincialis]	ABO36618	1.41067e-24	100
contig_3799	682	collagen alpha-1 chain	gi|405957975|gb|EKC24149.1|Vitrin [Crassostrea gigas]	EKC24149	2.29738e-05	42
contig_1764	678	short-chain collagen c4	gi|260790545|ref|XP_002590302.1|hypothetical protein BRAFLDRAFT_76555 [Branchiostoma floridae] >gi|229275494|gb|EEN46313.1| hypothetical protein BRAFLDRAFT_76555 [Branchiostoma floridae]	XP_002590302	1.15519e-38	60
contig_6822	678	hypothetical protein BRAFLDRAFT_117723	gi|260795645|ref|XP_002592815.1|hypothetical protein BRAFLDRAFT_117723 [Branchiostoma floridae] >gi|229278039|gb|EEN48826.1| hypothetical protein BRAFLDRAFT_117723 [Branchiostoma floridae]	XP_002592815	0.0845022	46
contig_313	678	cytochrome c oxidase assembly protein mitochondrial-like	gi|527255949|ref|XP_005146251.1|PREDICTED: cytochrome c oxidase assembly protein COX11, mitochondrial-like [Melopsittacus undulatus]	XP_005146251	3.08466e-08	60
contig_7030	675	rna-binding protein 24-b	gi|405963050|gb|EKC28659.1|RNA-binding protein 24-A [Crassostrea gigas]	EKC28659	4.69448e-26	95
contig_2094	675	carboxypeptidase n subunit 2-like	gi|405972797|gb|EKC37545.1|Platelet glycoprotein V [Crassostrea gigas]	EKC37545	6.59077e-16	49
contig_3268	675	beta tubulin	gi|505858406|ref|XP_004622597.1|PREDICTED: tubulin beta chain-like [Sorex araneus]	XP_004622597	5.23478e-134	94
contig_11381	673	coatomer subunit alpha	gi|325504355|emb|CBX41677.1|putative C1q domain containing protein MgC1q28 [Mytilus galloprovincialis]	CBX41677	8.8171e-20	72
contig_10958	673	PREDICTED: similar to peroxiredoxin	gi|91076594|ref|XP_968419.1|PREDICTED: similar to peroxiredoxin [Tribolium castaneum] >gi|270002912|gb|EEZ99359.1| hypothetical protein TcasGA2_TC004948 [Tribolium castaneum]	XP_968419	57.7951	72
contig_8748	672	ribosomal protein s3	gi|148684446|gb|EDL16393.1|ribosomal protein S3, isoform CRA_h [Mus musculus]	EDL16393	7.24454e-32	78
contig_3300	672	hypothetical protein CHLREDRAFT_181105	gi|159479782|ref|XP_001697967.1|hypothetical protein CHLREDRAFT_181105 [Chlamydomonas reinhardtii] >gi|158269900|gb|EDO96001.1| predicted protein [Chlamydomonas reinhardtii]	XP_001697967	0.00196392	46
contig_1137	672	ctxa_chiqu ame: full=toxin -a short=cqt-a short=toxin a flags: precursor	gi|20137750|sp|P58762.1|CTXA_CHIQURecName: Full=Toxin CqTX-A; Short=CQT-A; Short=Toxin A; Flags: Precursor >gi|18146993|dbj|BAB82520.1| CqTX-A [Chiropsalmus quadrigatus]	P58762	1.59933e-10	45
contig_3347	669	hypothetical protein CGI_10014257	gi|405957834|gb|EKC24014.1|hypothetical protein CGI_10014257 [Crassostrea gigas]	EKC24014	2.0301e-09	75
contig_7370	669	dna-directed rna polymerase iii subunit rpc6	gi|260831248|ref|XP_002610571.1|hypothetical protein BRAFLDRAFT_117854 [Branchiostoma floridae] >gi|229295938|gb|EEN66581.1| hypothetical protein BRAFLDRAFT_117854 [Branchiostoma floridae]	XP_002610571	5.40043e-16	90
contig_618	669	crumbs homolog 1	gi|470638363|ref|XP_004324382.1|PREDICTED: protein crumbs homolog 1-like [Tursiops truncatus]	XP_004324382	5.08386	79
contig_8969	664	nadh dehydrogenase	gi|21064487|gb|AAM29473.1|RE41779p [Drosophila melanogaster]	AAM29473	0.000651546	80
contig_215	664	hypothetical protein CGI_10014362	gi|405972268|gb|EKC37046.1|hypothetical protein CGI_10014362 [Crassostrea gigas]	EKC37046	0.3721	68
contig_5998	663	lipopolysaccharide-induced tumor necrosis factor-alpha factor-like protein	gi|114797044|gb|ABI79459.1|LPS-induced TNF-alpha factor [Azumapecten farreri]	ABI79459	1.17858e-07	92
contig_10669	663	actin-binding protein	gi|443701600|gb|ELT99976.1|hypothetical protein CAPTEDRAFT_112570 [Capitella teleta]	ELT99976	4.67899e-19	85
contig_8144	662	sco-spondin partial	gi|405973590|gb|EKC38295.1|SCO-spondin [Crassostrea gigas]	EKC38295	2.45038e-07	54
contig_7016	660	calmodulin	gi|20137483|sp|Q9HFY6.3|CALM_BLAEMRecName: Full=Calmodulin; Short=CaM >gi|11138677|gb|AAG31446.1|AF264065_1 calmodulin [Blastocladiella emersonii]	Q9HFY6	1.62778e-18	73
contig_5053	660	PREDICTED: cubilin	gi|530577108|ref|XP_005282510.1|PREDICTED: cubilin [Chrysemys picta bellii]	XP_005282510	8.9796	55
contig_1090	658	26s proteasome non-atpase regulatory subunit 7-like	gi|405962439|gb|EKC28114.1|26S proteasome non-ATPase regulatory subunit 7 [Crassostrea gigas]	EKC28114	4.37144e-11	93
contig_11846	657	endonuclease exonuclease phosphatase	gi|156335524|ref|XP_001619610.1|hypothetical protein NEMVEDRAFT_v1g150827 [Nematostella vectensis] >gi|156203139|gb|EDO27510.1| predicted protein [Nematostella vectensis]	XP_001619610	1.41567e-05	59
contig_11991	656	pao retrotransposon peptidase family	gi|291231345|ref|XP_002735625.1|PREDICTED: Pao retrotransposon peptidase family protein-like [Saccoglossus kowalevskii]	XP_002735625	4.72407e-11	55
contig_1374	655	vwfa and cache domain-containing protein 1	gi|302773029|ref|XP_002969932.1|hypothetical protein SELMODRAFT_410563 [Selaginella moellendorffii] >gi|300162443|gb|EFJ29056.1| hypothetical protein SELMODRAFT_410563 [Selaginella moellendorffii]	XP_002969932	0.517905	42
contig_4262	655	bifunctional protein ncoat	gi|405950037|gb|EKC18045.1|Bifunctional protein NCOAT [Crassostrea gigas]	EKC18045	0.0029585	62
contig_3389	654	calponin-like protein	gi|14422379|dbj|BAB60813.1|calponin-like protein [Mytilus galloprovincialis]	BAB60813	4.64941e-15	100
contig_8582	654	c1q domain containing protein 1q91	gi|325504481|emb|CBX41740.1|putative C1q domain containing protein MgC1q91 [Mytilus galloprovincialis]	CBX41740	3.03179e-37	89
contig_14718	654	PREDICTED: predicted protein-like	gi|291245182|ref|XP_002742470.1|PREDICTED: predicted protein-like [Saccoglossus kowalevskii]	XP_002742470	14.6462	53
contig_500	653	endonuclease domain-containing 1	gi|528467428|ref|XP_005170933.1|PREDICTED: endonuclease domain-containing 1 protein-like [Danio rerio]	XP_005170933	2.19325e-18	55
contig_704	652	f5 8 type c domain protein	gi|66812706|ref|XP_640532.1|hypothetical protein DDB_G0281609 [Dictyostelium discoideum AX4] >gi|60468563|gb|EAL66566.1| hypothetical protein DDB_G0281609 [Dictyostelium discoideum AX4]	XP_640532	8.32208e-16	57
contig_10285	651	mesenchyme-specific cell surface glycoprotein	gi|405953527|gb|EKC21174.1|Mesenchyme-specific cell surface glycoprotein [Crassostrea gigas]	EKC21174	6.8069e-09	66
contig_10397	651	hypothetical protein CGI_10010255	gi|405960179|gb|EKC26122.1|hypothetical protein CGI_10010255 [Crassostrea gigas]	EKC26122	1.11083e-05	66
contig_1113	651	allene oxide synthase-lipoxygenase	gi|260800484|ref|XP_002595160.1|hypothetical protein BRAFLDRAFT_118620 [Branchiostoma floridae] >gi|229280402|gb|EEN51171.1| hypothetical protein BRAFLDRAFT_118620 [Branchiostoma floridae]	XP_002595160	6.86262e-13	76
contig_7335	649	hypothetical protein CGI_10018324	gi|405969268|gb|EKC34249.1|hypothetical protein CGI_10018324 [Crassostrea gigas]	EKC34249	8.3228e-24	67
contig_10541	648	hypothetical protein CGI_10011072	gi|405976854|gb|EKC41334.1|hypothetical protein CGI_10011072 [Crassostrea gigas]	EKC41334	0.00012409	78
contig_3674	646	accessory gland protein	gi|405975933|gb|EKC40462.1|26S proteasome non-ATPase regulatory subunit 6 [Crassostrea gigas]	EKC40462	2.0096e-17	96
contig_3821	645	cytoplasmic actin	gi|26522944|dbj|BAC44869.1|actin [Favites chinensis]	BAC44869	1.61723e-150	99
contig_1323	644	zygote arrest protein 1-like	gi|405963669|gb|EKC29225.1|Zygote arrest protein 1 [Crassostrea gigas]	EKC29225	7.60611e-16	78
contig_1492	644	ribosomal protein l15	gi|188572520|gb|ACD65166.1|putative 60S ribosomal protein RPL15 [Phoronis muelleri]	ACD65166	5.17938e-24	96
contig_6444	644	organic cation transporter protein	gi|405954357|gb|EKC21821.1|Organic cation transporter protein [Crassostrea gigas]	EKC21821	7.34921e-14	81
contig_6459	644	hypothetical protein BRAFLDRAFT_92388	gi|260827154|ref|XP_002608530.1|hypothetical protein BRAFLDRAFT_92388 [Branchiostoma floridae] >gi|229293881|gb|EEN64540.1| hypothetical protein BRAFLDRAFT_92388 [Branchiostoma floridae]	XP_002608530	18.1718	45
contig_5413	643	proline racemase	gi|405958634|gb|EKC24743.1|Putative proline racemase [Crassostrea gigas]	EKC24743	30.0384	72
contig_12827	643	PREDICTED: uncharacterized protein LOC574673	gi|390355078|ref|XP_780134.3|PREDICTED: uncharacterized protein LOC574673 [Strongylocentrotus purpuratus]	XP_780134	8.20178	52
contig_620	643	Kinesin-2	gi|405976492|gb|EKC40997.1|Kinesin-2 [Crassostrea gigas]	EKC40997	0.0155937	81
contig_4054	642	s1a subfamily	gi|74275442|gb|ABA02192.1|elastase protein [Mytilus edulis]	ABA02192	2.30607e-23	76
contig_3733	642	atp-dependent rna helicase ddx39a-like	gi|33337643|gb|AAQ13472.1|BAT1 homolog [Crassostrea gigas]	AAQ13472	2.82235e-15	97
contig_1149	641	plasminogen precursor	gi|148670121|gb|EDL02068.1|plasminogen, isoform CRA_h [Mus musculus]	EDL02068	4.71815e-07	80
contig_2196	641	l-rhamnose-binding lectin csl3-like	gi|260800499|ref|XP_002595167.1|hypothetical protein BRAFLDRAFT_110271 [Branchiostoma floridae] >gi|229280410|gb|EEN51178.1| hypothetical protein BRAFLDRAFT_110271 [Branchiostoma floridae]	XP_002595167	0.00215483	74
contig_5105	640	endonuclease-reverse transcriptase	gi|357610863|gb|EHJ67180.1|endonuclease-reverse transcriptase [Danaus plexippus]	EHJ67180	0.247541	56
contig_3317	639	transcription regulator protein bach1	gi|405977767|gb|EKC42201.1|BEN domain-containing protein 3 [Crassostrea gigas]	EKC42201	6.67608e-07	82
contig_3820	638	anaphase-promoting complex subunit 11-like	gi|321463580|gb|EFX74595.1|hypothetical protein DAPPUDRAFT_307195 [Daphnia pulex]	EFX74595	9.11535e-11	100
contig_13454	635	lipopolysaccharide-induced tnf-alpha factor	gi|158198543|gb|ABW23426.1|LPS-induced TNF-alpha factor [Crassostrea ariakensis]	ABW23426	0.000135643	76
contig_6801	635	hypothetical protein BRAFLDRAFT_80549	gi|260805140|ref|XP_002597445.1|hypothetical protein BRAFLDRAFT_80549 [Branchiostoma floridae] >gi|229282710|gb|EEN53457.1| hypothetical protein BRAFLDRAFT_80549 [Branchiostoma floridae]	XP_002597445	4.15747e-16	68
contig_12196	634	nuclear cap-binding protein subunit 1-like	gi|405966159|gb|EKC31472.1|Nuclear cap-binding protein subunit 1 [Crassostrea gigas]	EKC31472	3.01609e-14	87
contig_2862	634	40s ribosomal protein s3a	gi|166406842|gb|ABY87384.1|40S ribosomal protein S3a [Haliotis diversicolor]	ABY87384	5.48124e-58	98
contig_1102	633	actin 5c	gi|120564812|gb|ABM30210.1|actin [Mytilus sp. KL-2006]	ABM30210	6.56281e-143	100
contig_4787	631	transmembrane protein 86a	gi|405967663|gb|EKC32799.1|Transmembrane protein 86A [Crassostrea gigas] >gi|405967664|gb|EKC32800.1| Transmembrane protein 86A [Crassostrea gigas]	EKC32799	2.86979e-20	60
contig_1426	631	transitional endoplasmic reticulum atpase	gi|443694341|gb|ELT95504.1|hypothetical protein CAPTEDRAFT_161400, partial [Capitella teleta]	ELT95504	1.13861e-11	85
contig_1494	629	cathepsin b	gi|170787211|gb|ACB38229.1|cathepsin B [Meretrix meretrix]	ACB38229	2.97783e-18	76
contig_1878	627	beta-4 tubulin	gi|134254730|gb|ABO65095.1|beta-4 tubulin [Homo sapiens]	ABO65095	1.32588e-23	100
contig_3242	626	dopamine beta hydroxylase	gi|310706686|gb|ADP08787.1|dopamine beta hydroxylase [Azumapecten farreri]	ADP08787	2.46028	56
contig_1982	626	ctx1_carra ame: full=toxin -a ame: full=crt-1 ame: full= -b ame: full=toxin 1 flags: precursor	gi|405961758|gb|EKC27509.1|hypothetical protein CGI_10013790 [Crassostrea gigas]	EKC27509	6.72345e-06	44
contig_12783	625	platelet-activating factor isoform alpha subunit	gi|358334847|dbj|GAA36977.2|1-alkyl-2-acetylglycerophosphocholine esterase [Clonorchis sinensis]	GAA36977	9.99014e-07	84
contig_3986	624	protein lap2	gi|156342167|ref|XP_001620897.1|hypothetical protein NEMVEDRAFT_v1g146703 [Nematostella vectensis] >gi|156206344|gb|EDO28797.1| predicted protein [Nematostella vectensis]	XP_001620897	0.0017626	76
contig_8923	624	protein	gi|156377195|ref|XP_001630742.1|predicted protein [Nematostella vectensis] >gi|156217769|gb|EDO38679.1| predicted protein [Nematostella vectensis]	XP_001630742	1.76769e-13	65
contig_157	623	serine threonine-protein kinase pats1	gi|405964135|gb|EKC29652.1|Putative serine/threonine-protein kinase pats1 [Crassostrea gigas]	EKC29652	0.00563513	46
contig_1601	623	collagen alpha-6 chain	gi|405951584|gb|EKC19484.1|hypothetical protein CGI_10008456 [Crassostrea gigas]	EKC19484	1.57315e-06	60
contig_9205	622	proteasome activator complex subunit 4	gi|405976422|gb|EKC40928.1|Proteasome activator complex subunit 4 [Crassostrea gigas]	EKC40928	1.53876e-10	77
contig_14234	622	collectin- partial	gi|348526258|ref|XP_003450637.1|PREDICTED: C-type lectin domain family 4 member M-like [Oreochromis niloticus]	XP_003450637	0.189501	56
contig_1525	622	cholecystokinin receptor	gi|405975570|gb|EKC40128.1|Cholecystokinin receptor type A [Crassostrea gigas]	EKC40128	2.60967e-24	66
contig_7081	621	collagen alpha-5 chain	gi|524892582|ref|XP_005102818.1|PREDICTED: uncharacterized protein LOC101848301 [Aplysia californica]	XP_005102818	0.000257474	78
contig_6418	618	ubiquinol-cytochrome c oxidoreductase subunit 9 and rieske iron sulfur protein	gi|321477681|gb|EFX88639.1|hypothetical protein DAPPUDRAFT_304712 [Daphnia pulex]	EFX88639	0.0150912	72
contig_3601	616	prostaglandin e receptor subtype partial	gi|405964748|gb|EKC30197.1|Prostaglandin E2 receptor EP4 subtype [Crassostrea gigas]	EKC30197	6.519e-39	71
contig_9920	616	l-xylulose reductase	gi|395533189|ref|XP_003768643.1|PREDICTED: carbonyl reductase [NADPH] 2-like [Sarcophilus harrisii]	XP_003768643	8.46814e-07	75
contig_173	616	gag-like protein	gi|125901786|gb|ABN58713.1|gag-like protein [Biomphalaria glabrata]	ABN58713	5.61794e-15	51
contig_2822	616	exosome complex component rrp43	gi|148703325|gb|EDL35272.1|exosome component 8, isoform CRA_a [Mus musculus]	EDL35272	0.000677529	84
contig_202	616	collagen alpha-1 chain	gi|405954160|gb|EKC21677.1|hypothetical protein CGI_10003549 [Crassostrea gigas]	EKC21677	30.0987	52
contig_99	616	beta- partial	gi|452888520|gb|AGG18260.1|beta-actin, partial [Microplitis mediator]	AGG18260	6.54041e-122	100
contig_4369	616	aplp_locmi ame: full=apolipophorins contains: ame: full=apolipophorin-2 ame: full=apolipophorin ii ame: full=apolp-2 contains: ame: full=apolipophorin-1 ame: full=apolipophorin i ame: full=apolp-1 flags: precursor	gi|405952565|gb|EKC20361.1|hypothetical protein CGI_10006236 [Crassostrea gigas]	EKC20361	1.13868e-07	56
contig_7866	615	hypothetical protein CGI_10007458	gi|405951985|gb|EKC19847.1|hypothetical protein CGI_10007458 [Crassostrea gigas]	EKC19847	0.0235747	87
contig_3134	613	hypothetical protein CGI_10009106	gi|405951331|gb|EKC19253.1|hypothetical protein CGI_10009106 [Crassostrea gigas]	EKC19253	8.18134e-13	68
contig_866	613	elongation factor-1 gamma	gi|505858513|ref|XP_004622650.1|PREDICTED: elongation factor 1-gamma-like, partial [Sorex araneus]	XP_004622650	1.45309e-55	79
contig_1278	612	translation initiation factor eif-2b subunit beta	gi|405978520|gb|EKC42900.1|Translation initiation factor eIF-2B subunit beta [Crassostrea gigas]	EKC42900	4.01187e-12	84
contig_6720	612	peroxiredoxin 6	gi|469664349|gb|AGH70129.1|glutathione peroxidase, partial [Placozoa sp. H4]	AGH70129	5.64858e-11	88
contig_1887	612	hypothetical protein CGI_10021533	gi|405976814|gb|EKC41298.1|hypothetical protein CGI_10021533 [Crassostrea gigas]	EKC41298	4.13855e-23	66
contig_402	612	ctx1_chifl ame: full=toxin -1 short=toxin 1 flags: precursor	gi|160380600|sp|A7L035.1|CTX1_CHIFLRecName: Full=Toxin CfTX-1; Short=Toxin 1; Flags: Precursor >gi|152211366|gb|ABS30940.1| toxin-1 [Chironex fleckeri]	A7L035	5.22024e-10	50
contig_13956	608	f-box lrr-repeat protein 2 isoform 2	gi|405960168|gb|EKC26111.1|F-box/LRR-repeat protein 20 [Crassostrea gigas]	EKC26111	2.1708e-10	88
contig_400	608	c1q domain containing protein 1q43	gi|325504385|emb|CBX41692.1|putative C1q domain containing protein MgC1q43 [Mytilus galloprovincialis]	CBX41692	1.30278e-30	89
contig_2388	606	caspase partial	gi|325516441|gb|ADZ24779.1|caspase 8 [Mytilus galloprovincialis]	ADZ24779	3.74963e-18	100
contig_1636	605	meiosis expressed gene 1 protein homolog	gi|443684955|gb|ELT88739.1|hypothetical protein CAPTEDRAFT_161113 [Capitella teleta]	ELT88739	1.74797e-13	100
contig_9617	605	histone-lysine n-methyltransferase prdm9	gi|260785161|ref|XP_002587631.1|hypothetical protein BRAFLDRAFT_96471 [Branchiostoma floridae] >gi|229272781|gb|EEN43642.1| hypothetical protein BRAFLDRAFT_96471 [Branchiostoma floridae]	XP_002587631	3.4814e-06	52
contig_3602	604	prostaglandin e receptor subtype partial	gi|405964748|gb|EKC30197.1|Prostaglandin E2 receptor EP4 subtype [Crassostrea gigas]	EKC30197	7.21033e-37	69
contig_28	604	cg9747 cg9747-pa	gi|270015959|gb|EFA12407.1|hypothetical protein TcasGA2_TC016409 [Tribolium castaneum]	EFA12407	38.6135	65
contig_14934	603	atp h+ mitochondrial f1 beta polypeptide	gi|56608659|gb|AAW02963.1|mitochondrial ATP synthase beta subunit [Mesenchytraeus solifugus]	AAW02963	7.50116e-10	93
contig_5829	602	protein o-linked-mannose beta- -n-acetylglucosaminyltransferase 1	gi|405959515|gb|EKC25544.1|Protein O-linked-mannose beta-1,2-N-acetylglucosaminyltransferase 1 [Crassostrea gigas]	EKC25544	1.83256	76
contig_4377	600	eukaryotic translation initiation factor 4e-binding protein 2	gi|405974066|gb|EKC38736.1|Eukaryotic translation initiation factor 4E-binding protein 1 [Crassostrea gigas]	EKC38736	7.93619e-10	84
contig_6851	599	predicted protein	gi|156391191|ref|XP_001635652.1|predicted protein [Nematostella vectensis] >gi|156222748|gb|EDO43589.1| predicted protein [Nematostella vectensis]	XP_001635652	1.05719	60
contig_8503	597	sporozoite surface protein	gi|524913897|ref|XP_005111771.1|PREDICTED: poly(ADP-ribose) polymerase pme-5-like [Aplysia californica]	XP_005111771	3.66822e-17	77
contig_425	596	surfeit locus protein 2	gi|524900124|ref|XP_005106486.1|PREDICTED: surfeit locus protein 2-like isoform X2 [Aplysia californica]	XP_005106486	0.348171	60
contig_6348	596	pancreatic lipase-related protein 1	gi|405969538|gb|EKC34504.1|Pancreatic lipase-related protein 1 [Crassostrea gigas]	EKC34504	2.73237e-09	67
contig_2156	596	hypothetical protein CGI_10014563	gi|405958529|gb|EKC24651.1|hypothetical protein CGI_10014563 [Crassostrea gigas]	EKC24651	3.30184	67
contig_10132	595	tripartite motif-containing protein 56	gi|405975137|gb|EKC39728.1|Tripartite motif-containing protein 45 [Crassostrea gigas]	EKC39728	0.000126923	53
contig_1769	595	hypothetical protein CAPTEDRAFT_223578	gi|443718498|gb|ELU09101.1|hypothetical protein CAPTEDRAFT_223578 [Capitella teleta]	ELU09101	0.0776679	61
contig_1765	593	protein	gi|405959649|gb|EKC25661.1|hypothetical protein CGI_10017594 [Crassostrea gigas]	EKC25661	5.76105e-35	60
contig_1074	593	f5 8 type c domain protein	gi|66812706|ref|XP_640532.1|hypothetical protein DDB_G0281609 [Dictyostelium discoideum AX4] >gi|60468563|gb|EAL66566.1| hypothetical protein DDB_G0281609 [Dictyostelium discoideum AX4]	XP_640532	2.36131e-29	56
contig_11495	593	af483008_1mucin-like protein 1	gi|524870921|ref|XP_005092240.1|PREDICTED: uncharacterized protein LOC101849435 [Aplysia californica]	XP_005092240	0.000180879	60
contig_9449	592	phosphatidylinositol n-acetylglucosaminyltransferase subunit c	gi|405964483|gb|EKC29963.1|Phosphatidylinositol N-acetylglucosaminyltransferase subunit C [Crassostrea gigas]	EKC29963	1.43718e-12	84
contig_3005	592	elongation factor 1-gamma	gi|47209335|emb|CAF94682.1|unnamed protein product [Tetraodon nigroviridis]	CAF94682	4.15457e-08	81
contig_920	590	sialate o-acetylesterase	gi|141796169|gb|AAI34863.1|Zgc:56454 [Danio rerio]	AAI34863	0.0697102	61
contig_8257	590	beta-tubulin	gi|205345215|dbj|BAG71387.1|beta tubulin [Ctenella chagius]	BAG71387	3.58856e-09	76
contig_158	589	serine threonine-protein kinase pats1	gi|405964135|gb|EKC29652.1|Putative serine/threonine-protein kinase pats1 [Crassostrea gigas]	EKC29652	0.0101412	50
contig_4272	589	bifunctional protein ncoat	gi|405950037|gb|EKC18045.1|Bifunctional protein NCOAT [Crassostrea gigas]	EKC18045	0.0665522	75
contig_5319	587	fibrinogen-related protein	gi|312270835|gb|ADQ55814.1|fibrinogen-related protein [Mytilus galloprovincialis]	ADQ55814	0.395768	67
contig_3014	586	tubulin alpha-1a chain- partial	gi|333449496|gb|AEF33433.1|tubulin alpha, partial [Crassostrea ariakensis]	AEF33433	2.1835e-140	100
contig_312	586	diazepam-binding protein	gi|297266917|ref|XP_002799453.1|PREDICTED: acyl-CoA-binding protein-like isoform 2 [Macaca mulatta]	XP_002799453	5.64333e-05	60
contig_4280	585	goose-type lysozyme 1	gi|402227923|gb|AFQ35949.1|goose-type lysozyme 1 [Mytilus galloprovincialis]	AFQ35949	1.53751e-28	98
contig_1607	585	e3 ubiquitin-protein ligase trim71	gi|524950285|ref|XP_005075158.1|PREDICTED: E3 ubiquitin-protein ligase TRIM71 [Mesocricetus auratus]	XP_005075158	7.90033e-07	41
contig_3618	585	complement c1q-like protein 3	gi|405959435|gb|EKC25476.1|Complement C1q tumor necrosis factor-related protein 4 [Crassostrea gigas]	EKC25476	3.60334e-08	69
contig_3050	585	cathepsin d	gi|218944225|gb|ACL13150.1|cathepsin D [Azumapecten farreri]	ACL13150	2.20503e-15	94
contig_1100	584	beta- partial	gi|167683058|gb|ABZ91671.1|actin [Plectreurys tristis]	ABZ91671	2.09619e-125	98
contig_3836	583	hypothetical protein CGI_10020106	gi|405971746|gb|EKC36561.1|hypothetical protein CGI_10020106 [Crassostrea gigas]	EKC36561	0.0118994	72
contig_818	582	elongation factor-1 gamma	gi|241630764|ref|XP_002410199.1|elongation factor 1 gamma, putative [Ixodes scapularis] >gi|215503343|gb|EEC12837.1| elongation factor 1 gamma, putative [Ixodes scapularis]	XP_002410199	6.03482e-41	84
contig_2370	582	collagen alpha-4 chain	gi|405975734|gb|EKC40282.1|Collagen alpha-4(VI) chain [Crassostrea gigas]	EKC40282	7.89364e-06	89
contig_2433	578	nuclear transcription factor y subunit alpha	gi|405972605|gb|EKC37366.1|Nuclear transcription factor Y subunit alpha [Crassostrea gigas]	EKC37366	1.94776e-10	100
contig_399	578	elongation of very long chain fatty acids protein 4-like	gi|405961015|gb|EKC26878.1|Elongation of very long chain fatty acids protein 4, partial [Crassostrea gigas]	EKC26878	2.40471e-16	89
contig_2778	576	actin beta subunit	gi|410922427|ref|XP_003974684.1|PREDICTED: actin, cytoplasmic 3-like [Takifugu rubripes]	XP_003974684	7.88233e-57	100
contig_12755	575	protein outspread	gi|405976131|gb|EKC40650.1|Protein outspread [Crassostrea gigas]	EKC40650	2.71976e-05	89
contig_5543	575	proteasome subunit beta type-3	gi|291225400|ref|XP_002732675.1|PREDICTED: proteasome beta 3 subunit-like [Saccoglossus kowalevskii]	XP_002732675	9.25996e-21	93
contig_8295	575	26s proteasome non-atpase regulatory subunit 8-like	gi|405967909|gb|EKC33025.1|26S proteasome non-ATPase regulatory subunit 8 [Crassostrea gigas]	EKC33025	2.63674e-07	100
contig_14952	574	purine nucleoside phosphorylase-like	gi|405976150|gb|EKC40668.1|Purine nucleoside phosphorylase [Crassostrea gigas]	EKC40668	1.44557e-16	74
contig_1767	572	short-chain collagen c4	gi|260788034|ref|XP_002589056.1|hypothetical protein BRAFLDRAFT_87529 [Branchiostoma floridae] >gi|229274229|gb|EEN45067.1| hypothetical protein BRAFLDRAFT_87529 [Branchiostoma floridae]	XP_002589056	8.05839e-40	63
contig_1606	572	e3 ubiquitin-protein ligase trim71	gi|524950285|ref|XP_005075158.1|PREDICTED: E3 ubiquitin-protein ligase TRIM71 [Mesocricetus auratus]	XP_005075158	1.13123e-08	44
contig_7834	571	protein kinase brain isozyme	gi|391348877|ref|XP_003748667.1|PREDICTED: protein kinase C, brain isozyme-like [Metaseiulus occidentalis]	XP_003748667	6.40772e-08	84
contig_6494	571	hypothetical protein BRAFLDRAFT_74507	gi|260808041|ref|XP_002598816.1|hypothetical protein BRAFLDRAFT_74507 [Branchiostoma floridae] >gi|229284091|gb|EEN54828.1| hypothetical protein BRAFLDRAFT_74507 [Branchiostoma floridae]	XP_002598816	8.03262e-30	69
contig_1535	571	beta- partial	gi|452888520|gb|AGG18260.1|beta-actin, partial [Microplitis mediator]	AGG18260	2.53553e-112	100
contig_204	570	tubulin beta chain variant 1	gi|426222882|ref|XP_004005609.1|PREDICTED: tubulin beta-4B chain [Ovis aries]	XP_004005609	6.0263e-53	100
contig_11290	570	c1q domain containing protein 1q7	gi|325504313|emb|CBX41656.1|putative C1q domain containing protein MgC1q7 [Mytilus galloprovincialis]	CBX41656	2.58497e-09	85
contig_6382	569	poly(adp-ribose) polymerase pme-5-like	gi|405952571|gb|EKC20366.1|hypothetical protein CGI_10006111 [Crassostrea gigas]	EKC20366	2.26584e-07	80
contig_5774	569	e3 ubiquitin-protein ligase mycbp2	gi|405977192|gb|EKC41654.1|Putative E3 ubiquitin-protein ligase MYCBP2 [Crassostrea gigas]	EKC41654	6.13075e-28	77
contig_9269	569	adenylate cyclase type 3-like	gi|24475508|dbj|BAC22720.1|unnamed protein product [Wolbachia endosymbiont of Callosobruchus chinensis]	BAC22720	1.35724e-08	63
contig_774	568	zgc:112263 protein	gi|260821398|ref|XP_002606020.1|hypothetical protein BRAFLDRAFT_129515 [Branchiostoma floridae] >gi|229291357|gb|EEN62030.1| hypothetical protein BRAFLDRAFT_129515 [Branchiostoma floridae]	XP_002606020	0.567817	69
contig_5216	566	gag-like protein	gi|125901786|gb|ABN58713.1|gag-like protein [Biomphalaria glabrata]	ABN58713	0.000199145	65
contig_4808	565	endonuclease domain-containing 1	gi|528467428|ref|XP_005170933.1|PREDICTED: endonuclease domain-containing 1 protein-like [Danio rerio]	XP_005170933	8.80042e-18	56
contig_12629	561	protein jagged-2	gi|405969398|gb|EKC34371.1|Protein jagged-2 [Crassostrea gigas]	EKC34371	0.00570104	64
contig_670	559	tubulin alpha-1a chain-like	gi|470643071|ref|XP_004326123.1|PREDICTED: tubulin alpha-1C chain-like [Tursiops truncatus]	XP_004326123	2.22397e-115	99
contig_2418	558	intraflagellar transport protein 46 homolog	gi|443714026|gb|ELU06595.1|hypothetical protein CAPTEDRAFT_181738 [Capitella teleta]	ELU06595	7.90286e-06	94
contig_13678	557	myosin- partial	gi|405953164|gb|EKC20877.1|Myosin-Vb, partial [Crassostrea gigas]	EKC20877	2.77835	73
contig_4823	557	cytochrome b-c1 complex subunit mitochondrial-like	gi|323650032|gb|ADX97102.1|mitochondrial cytochrome b-c1 complex subunit rieske [Perca flavescens]	ADX97102	7.50129e-34	79
contig_8777	556	tpa: zinc finger protein	gi|443691890|gb|ELT93632.1|hypothetical protein CAPTEDRAFT_191770 [Capitella teleta]	ELT93632	3.22553e-07	78
contig_13379	555	s-formylglutathione hydrolase	gi|260817264|ref|XP_002603507.1|hypothetical protein BRAFLDRAFT_79044 [Branchiostoma floridae] >gi|229288826|gb|EEN59518.1| hypothetical protein BRAFLDRAFT_79044 [Branchiostoma floridae]	XP_002603507	0.00033798	82
contig_6495	555	fad binding domain protein	gi|125901786|gb|ABN58713.1|gag-like protein [Biomphalaria glabrata]	ABN58713	6.91127e-05	58
contig_14093	554	n protein	gi|405965767|gb|EKC31121.1|hypothetical protein CGI_10028750 [Crassostrea gigas]	EKC31121	1.38799e-06	89
contig_10025	553	wd repeat-containing protein 90	gi|405964752|gb|EKC30201.1|WD repeat-containing protein 90 [Crassostrea gigas]	EKC30201	0.000432333	91
contig_9012	553	reverse transcriptase	gi|390351605|ref|XP_003727690.1|PREDICTED: RNA-directed DNA polymerase from mobile element jockey-like [Strongylocentrotus purpuratus]	XP_003727690	5.51456e-07	55
contig_2534	553	elongation factor-2 kinase	gi|405963369|gb|EKC28948.1|hypothetical protein CGI_10012792 [Crassostrea gigas]	EKC28948	1.84229e-64	73
contig_8704	553	amine oxidoreductase	gi|543758|sp|P35903.1|ACHC_ACHFURecName: Full=Achacin; Flags: Precursor >gi|5596|emb|CAA45871.1| achacin [Achatina fulica]	P35903	6.19422e-05	80
contig_9290	552	predicted protein	gi|195998710|ref|XP_002109223.1|predicted protein [Trichoplax adhaerens] >gi|190587347|gb|EDV27389.1| predicted protein [Trichoplax adhaerens]	XP_002109223	0.005245	50
contig_10083	551	rna-binding protein luc7-like 2-like isoform x3	gi|389615238|dbj|BAM20602.1|splicing factor pTSR1, partial [Papilio polytes]	BAM20602	1.21819e-26	96
contig_7446	551	ribosyldihydronicotinamide dehydrogenase	gi|432098511|gb|ELK28226.1|Ribosyldihydronicotinamide dehydrogenase [quinone] [Myotis davidii]	ELK28226	2.16437e-08	76
contig_3885	550	eukaryotic translation initiation factor 3 subunit h	gi|524886666|ref|XP_005099926.1|PREDICTED: eukaryotic translation initiation factor 3 subunit H-like [Aplysia californica]	XP_005099926	1.09679e-09	84
contig_11103	549	wd40 repeat-containing protein smu1	gi|524882394|ref|XP_005097841.1|PREDICTED: WD40 repeat-containing protein SMU1-like [Aplysia californica]	XP_005097841	2.17685e-06	97
contig_3442	549	camp-dependent protein kinase type i-alpha regulatory subunit	gi|325297146|ref|NP_001191582.1|cAMP-dependent protein kinase regulatory subunit [Aplysia californica] >gi|400119|sp|P31319.2|KAPR_APLCA RecName: Full=cAMP-dependent protein kinase regulatory subunit; AltName: Full=N4 subunit of protein kinase A >gi|5588|emb|CAA44246.1| type N4 regulatory subunit of protein kinase A [Aplysia californica]	NP_001191582	4.72247e-09	86
contig_2622	549	26s proteasome non-atpase regulatory subunit 7	gi|405962439|gb|EKC28114.1|26S proteasome non-ATPase regulatory subunit 7 [Crassostrea gigas]	EKC28114	1.20811e-60	98
contig_4090	548	protein transport protein sec61 subunit alpha isoform 2-like	gi|389608743|dbj|BAM17983.1|sec61alpha [Papilio xuthus]	BAM17983	2.38661e-09	100
contig_3379	547	mib1 protein	gi|405964136|gb|EKC29653.1|E3 ubiquitin-protein ligase MIB1 [Crassostrea gigas]	EKC29653	0.00229602	91
contig_9509	546	ribosome production factor 2 homolog	gi|524893148|ref|XP_005103094.1|PREDICTED: ribosome production factor 2 homolog [Aplysia californica]	XP_005103094	0.126087	85
contig_6178	546	paramyosin	gi|42559342|sp|O96064.1|MYSP_MYTGARecName: Full=Paramyosin >gi|4115774|dbj|BAA36517.1| paramyosin [Mytilus galloprovincialis]	O96064	4.11981e-39	100
contig_1889	545	three prime repair exonuclease 1	gi|405967194|gb|EKC32388.1|hypothetical protein CGI_10022265 [Crassostrea gigas]	EKC32388	1.05969e-16	66
contig_11244	545	spectrin alpha- partial	gi|405973516|gb|EKC38224.1|Spectrin alpha chain [Crassostrea gigas]	EKC38224	5.22538e-15	73
contig_10407	544	lysine histidine transporter 1	gi|405973084|gb|EKC37816.1|Lysine histidine transporter 1 [Crassostrea gigas]	EKC37816	4.30919e-09	78
contig_422	543	elongation factor-2	gi|291233609|ref|XP_002736742.1|PREDICTED: conserved hypothetical protein-like [Saccoglossus kowalevskii]	XP_002736742	3.35722e-17	95
contig_938	542	lipopolysaccharide-induced tnf-alpha factor	gi|403397991|gb|AFR43657.1|lipopolysaccharide-induced TNF-alpha factor 2 [Crassostrea gigas]	AFR43657	0.000289933	81
contig_4769	542	complement c1q tumor necrosis factor-related protein 3	gi|325504317|emb|CBX41658.1|putative C1q domain containing protein MgC1q9 [Mytilus galloprovincialis]	CBX41658	4.1356e-27	100
contig_5245	541	transcription regulator protein bach1	gi|405964111|gb|EKC29633.1|Kelch-like protein 28 [Crassostrea gigas]	EKC29633	7.31124e-24	65
contig_8350	540	PREDICTED: hypothetical protein	gi|291241565|ref|XP_002740681.1|PREDICTED: hypothetical protein [Saccoglossus kowalevskii]	XP_002740681	11.2108	55
contig_12953	539	tyrosine-protein phosphatase non-receptor type 4	gi|405976887|gb|EKC41365.1|Tyrosine-protein phosphatase non-receptor type 4 [Crassostrea gigas]	EKC41365	0.00444057	87
contig_8754	539	mam and ldl-receptor class a domain-containing protein c10orf112-like	gi|347972713|ref|XP_320557.4|AGAP011974-PA [Anopheles gambiae str. PEST] >gi|333469692|gb|EAA00313.4| AGAP011974-PA [Anopheles gambiae str. PEST]	XP_320557	0.00749888	73
contig_2386	539	ctx1_carra ame: full=toxin -a ame: full=crt-1 ame: full= -b ame: full=toxin 1 flags: precursor	gi|20137965|sp|Q9GV72.1|CTX1_CARRARecName: Full=Toxin CrTX-A; AltName: Full=CRT-1; AltName: Full=CrTX-B; AltName: Full=Toxin 1; Flags: Precursor >gi|9988402|dbj|BAB12728.1| toxin-1 [Carybdea rastonii]	Q9GV72	0.000177605	52
contig_5440	538	tripartite motif-containing protein 45	gi|405974825|gb|EKC39438.1|E3 ubiquitin-protein ligase TRIM33 [Crassostrea gigas]	EKC39438	2.19284e-09	60
contig_3853	538	mysp_mytga ame: full=paramyosin	gi|42559342|sp|O96064.1|MYSP_MYTGARecName: Full=Paramyosin >gi|4115774|dbj|BAA36517.1| paramyosin [Mytilus galloprovincialis]	O96064	1.76443e-09	100
contig_4099	538	hypothetical protein CGI_10010255	gi|405960179|gb|EKC26122.1|hypothetical protein CGI_10010255 [Crassostrea gigas]	EKC26122	0.703059	66
contig_8180	538	hypothetical protein CGI_10002904	gi|405954651|gb|EKC22033.1|hypothetical protein CGI_10002904 [Crassostrea gigas]	EKC22033	41.3266	66
contig_812	538	angiopoietin-related protein 6	gi|405961543|gb|EKC27332.1|Angiopoietin-related protein 6 [Crassostrea gigas]	EKC27332	1.89594e-16	73
contig_9070	536	hypothetical protein CGI_10007361	gi|405967327|gb|EKC32502.1|hypothetical protein CGI_10007361 [Crassostrea gigas]	EKC32502	0.00110418	73
contig_5002	534	unconventional myosin-ixa-like	gi|405971677|gb|EKC36500.1|Myosin-IXa [Crassostrea gigas]	EKC36500	4.36272e-07	92
contig_6213	534	acetyl- hydrolase transferase	gi|405966123|gb|EKC31441.1|4-hydroxybutyrate coenzyme A transferase [Crassostrea gigas]	EKC31441	1.17135e-07	90
contig_8258	533	kinesin-like protein klp6-like	gi|524901404|ref|XP_005107109.1|PREDICTED: kinesin-like protein KLP6-like [Aplysia californica]	XP_005107109	4.08618e-17	75
contig_1527	533	hypothetical protein CGI_10024338	gi|405971073|gb|EKC35929.1|hypothetical protein CGI_10024338 [Crassostrea gigas]	EKC35929	2.67501e-12	64
contig_9910	533	hypothetical protein BRAFLDRAFT_74754	gi|260835948|ref|XP_002612969.1|hypothetical protein BRAFLDRAFT_74754 [Branchiostoma floridae] >gi|229298351|gb|EEN68978.1| hypothetical protein BRAFLDRAFT_74754 [Branchiostoma floridae]	XP_002612969	0.00789556	50
contig_4706	532	transport protein sec61 alpha subunit	gi|389608743|dbj|BAM17983.1|sec61alpha [Papilio xuthus]	BAM17983	1.12574e-08	100
contig_11883	531	moxd1 homolog 2-like	gi|260814213|ref|XP_002601810.1|hypothetical protein BRAFLDRAFT_215350 [Branchiostoma floridae] >gi|229287112|gb|EEN57822.1| hypothetical protein BRAFLDRAFT_215350 [Branchiostoma floridae]	XP_002601810	0.454795	81
contig_7353	531	guanine nucleotide-binding protein subunit beta-2-like 1	gi|210076889|gb|ACJ06767.1|receptor for activated C-kinase [Pinctada fucata] >gi|321375246|gb|ADW82123.1| activated C kinase 1 receptor [Pinctada martensi]	ACJ06767	5.89516e-23	98
contig_804	531	carboxypeptidase a2	gi|524982038|ref|XP_005039037.1|PREDICTED: carboxypeptidase A1-like [Ficedula albicollis]	XP_005039037	0.089886	57
contig_12999	530	enoyl coenzyme a hydratase peroxisomal	gi|465958345|gb|EMP27835.1|Heterogeneous nuclear ribonucleoprotein L [Chelonia mydas]	EMP27835	8.58909e-12	94
contig_12837	529	heavy metal-binding protein hip	gi|325504399|emb|CBX41699.1|putative C1q domain containing protein MgC1q50 [Mytilus galloprovincialis]	CBX41699	4.19977e-11	67
contig_11564	528	leukocyte receptor cluster member 9	gi|405969136|gb|EKC34134.1|Ceruloplasmin [Crassostrea gigas]	EKC34134	3.42933e-16	77
contig_7354	528	39s ribosomal protein mitochondrial	gi|507681610|ref|XP_004639591.1|PREDICTED: 39S ribosomal protein L18, mitochondrial [Octodon degus]	XP_004639591	18.0173	60
contig_672	527	tubulin alpha-3 chain-like	gi|395530085|ref|XP_003767129.1|PREDICTED: tubulin alpha-3 chain-like, partial [Sarcophilus harrisii]	XP_003767129	1.49207e-119	99
contig_10323	527	non-muscle actin i	gi|3046400|gb|AAC38981.1|actin 1 [Schmidtea polychroa]	AAC38981	1.48546e-14	97
contig_1115	527	c1q domain containing protein 1q45	gi|325504389|emb|CBX41694.1|putative C1q domain containing protein MgC1q45 [Mytilus galloprovincialis]	CBX41694	2.30128e-50	95
contig_1114	526	c1q domain containing protein 1q45	gi|325504389|emb|CBX41694.1|putative C1q domain containing protein MgC1q45 [Mytilus galloprovincialis]	CBX41694	4.87492e-51	96
contig_8039	524	voltage-dependent anion-selective channel protein 2	gi|524917241|ref|XP_005113381.1|PREDICTED: voltage-dependent anion-selective channel protein 2-like isoform X2 [Aplysia californica]	XP_005113381	0.000815046	82
contig_10777	524	hypothetical protein NEMVEDRAFT_v1g155059	gi|156322090|ref|XP_001618287.1|hypothetical protein NEMVEDRAFT_v1g155059 [Nematostella vectensis] >gi|156198317|gb|EDO26187.1| predicted protein [Nematostella vectensis]	XP_001618287	7.557e-10	81
contig_9227	523	c1q domain containing protein 1q51	gi|325504401|emb|CBX41700.1|putative C1q domain containing protein MgC1q51 [Mytilus galloprovincialis]	CBX41700	1.50931e-14	73
contig_9901	522	replication factor c subunit 3	gi|524896087|ref|XP_005104521.1|PREDICTED: replication factor C subunit 3-like [Aplysia californica]	XP_005104521	1.89593e-25	100
contig_6309	521	transcobalamin i-like	gi|307186165|gb|EFN71881.1|Uncharacterized protein CG3556 [Camponotus floridanus]	EFN71881	0.186916	49
contig_3688	521	selenium-dependent glutathione peroxidase	gi|324330438|gb|ADY38576.1|selenium-dependent glutathione peroxidase [Mytilus galloprovincialis]	ADY38576	7.90412e-20	98
contig_9262	521	fibro-slime family protein	gi|405950265|gb|EKC18263.1|Thrombospondin-4 [Crassostrea gigas]	EKC18263	9.33587e-14	85
contig_403	521	ctxa_chiqu ame: full=toxin -a short=cqt-a short=toxin a flags: precursor	gi|20137750|sp|P58762.1|CTXA_CHIQURecName: Full=Toxin CqTX-A; Short=CQT-A; Short=Toxin A; Flags: Precursor >gi|18146993|dbj|BAB82520.1| CqTX-A [Chiropsalmus quadrigatus]	P58762	0.00170008	55
contig_3694	520	pancreatic lipase-related protein 1	gi|405966881|gb|EKC32113.1|Pancreatic lipase-related protein 1 [Crassostrea gigas]	EKC32113	4.68447e-14	68
contig_2061	519	dbh-like monooxygenase protein 1 homolog	gi|459174963|ref|XP_002121457.2|PREDICTED: DBH-like monooxygenase protein 1-like [Ciona intestinalis]	XP_002121457	2.11939e-06	75
contig_912	517	nucleoside diphosphate-linked moiety x motif 22	gi|443684910|gb|ELT88699.1|hypothetical protein CAPTEDRAFT_118678 [Capitella teleta]	ELT88699	8.55362e-12	75
contig_2419	517	dual specificity protein phosphatase 7	gi|405973059|gb|EKC37794.1|Dual specificity protein phosphatase 7 [Crassostrea gigas]	EKC37794	1.35401e-35	81
contig_95	517	beta- partial	gi|167682034|gb|ABZ91659.1|actin [Euagrus chisoseus]	ABZ91659	4.45654e-107	100
contig_527	516	n-acetylmuramoyl-l-alanine amidase	gi|405960259|gb|EKC26200.1|Peptidoglycan-recognition protein SC2 [Crassostrea gigas]	EKC26200	2.69773e-37	82
contig_11472	515	plasma membrane calcium-transporting atpase 3	gi|405961070|gb|EKC26926.1|Plasma membrane calcium-transporting ATPase 3 [Crassostrea gigas]	EKC26926	2.21886e-12	89
contig_327	515	loc780759 protein	gi|156338537|ref|XP_001619962.1|hypothetical protein NEMVEDRAFT_v1g41088 [Nematostella vectensis] >gi|156204118|gb|EDO27862.1| predicted protein [Nematostella vectensis]	XP_001619962	2.27232e-24	93
contig_7784	515	dynein heavy chain axonemal	gi|405957466|gb|EKC23674.1|Dynein heavy chain 5, axonemal [Crassostrea gigas]	EKC23674	1.72616e-38	84
contig_2360	514	c1q domain containing protein 1q3	gi|325504305|emb|CBX41652.1|putative C1q domain containing protein MgC1q3 [Mytilus galloprovincialis]	CBX41652	1.13535e-22	100
contig_10934	513	nucleosome assembly protein 1-like 4	gi|405972660|gb|EKC37417.1|Nucleosome assembly protein 1-like 4 [Crassostrea gigas]	EKC37417	2.54542e-12	77
contig_3343	513	glutathione peroxidase 1	gi|324330438|gb|ADY38576.1|selenium-dependent glutathione peroxidase [Mytilus galloprovincialis]	ADY38576	5.5684e-76	100
contig_2096	511	eftud2 protein	gi|125901786|gb|ABN58713.1|gag-like protein [Biomphalaria glabrata]	ABN58713	4.7875e-25	55
contig_850	510	tripartite motif-containing protein 3	gi|405972335|gb|EKC37108.1|Tripartite motif-containing protein 3 [Crassostrea gigas]	EKC37108	9.13672	48
contig_723	510	cyclic amp-dependent transcription factor atf-2	gi|405951466|gb|EKC19376.1|Cyclic AMP-dependent transcription factor ATF-2 [Crassostrea gigas]	EKC19376	1.21567	79
contig_7142	508	wd repeat and socs box-containing protein 1	gi|291405524|ref|XP_002718830.1|PREDICTED: WD repeat and SOCS box-containing 1 [Oryctolagus cuniculus]	XP_002718830	1.51464e-08	68
contig_5854	508	tripartite motif-containing protein 56	gi|405968523|gb|EKC33587.1|Putative transcription factor PML [Crassostrea gigas]	EKC33587	2.25746e-07	54
contig_2420	508	dual specificity protein phosphatase 7	gi|405973059|gb|EKC37794.1|Dual specificity protein phosphatase 7 [Crassostrea gigas]	EKC37794	1.14696e-35	81
contig_4035	508	dolichyl-diphosphooligosaccharide--protein glycosyltransferase subunit 2	gi|405965244|gb|EKC30639.1|Dolichyl-diphosphooligosaccharide--protein glycosyltransferase subunit 2 [Crassostrea gigas]	EKC30639	3.30568e-09	86
contig_1099	507	partial	gi|78499635|gb|ABB45830.1|actin, partial [Lymnaea stagnalis]	ABB45830	4.48248e-105	98
contig_10398	507	hypothetical protein CGI_10010255	gi|405960179|gb|EKC26122.1|hypothetical protein CGI_10010255 [Crassostrea gigas]	EKC26122	3.22264e-06	66
contig_13222	505	three prime repair exonuclease 1	gi|405961524|gb|EKC27314.1|hypothetical protein CGI_10011860 [Crassostrea gigas]	EKC27314	1.33185e-18	94
contig_7555	505	proteasome subunit beta type-6-like	gi|524868842|ref|XP_005091219.1|PREDICTED: proteasome subunit beta type-6-like [Aplysia californica]	XP_005091219	2.00106e-05	87
contig_3338	505	dopamine beta hydroxylase	gi|310706686|gb|ADP08787.1|dopamine beta hydroxylase [Azumapecten farreri]	ADP08787	0.000195876	72
contig_1173	504	transaldolase isoform x2	gi|405959540|gb|EKC25566.1|Transaldolase [Crassostrea gigas]	EKC25566	9.88327e-13	97
contig_8848	503	hypothetical protein UY3_04472	gi|465990102|gb|EMP38263.1|hypothetical protein UY3_04472 [Chelonia mydas]	EMP38263	7.58729e-11	62
contig_1523	503	cholecystokinin receptor	gi|405958927|gb|EKC25009.1|Cholecystokinin receptor [Crassostrea gigas]	EKC25009	1.47764e-21	60
contig_5419	502	synaptosomal-associated protein 25	gi|405958806|gb|EKC24898.1|hypothetical protein CGI_10021497 [Crassostrea gigas]	EKC24898	0.299749	64
