# Supplementary figures and images for: Target Capture and Massive Sequencing of Genes Transcribed inMytilus galloprovincialis
Source: Hindawi journal article supplement (doi:10.1155/2014/538549), 2014-01-01

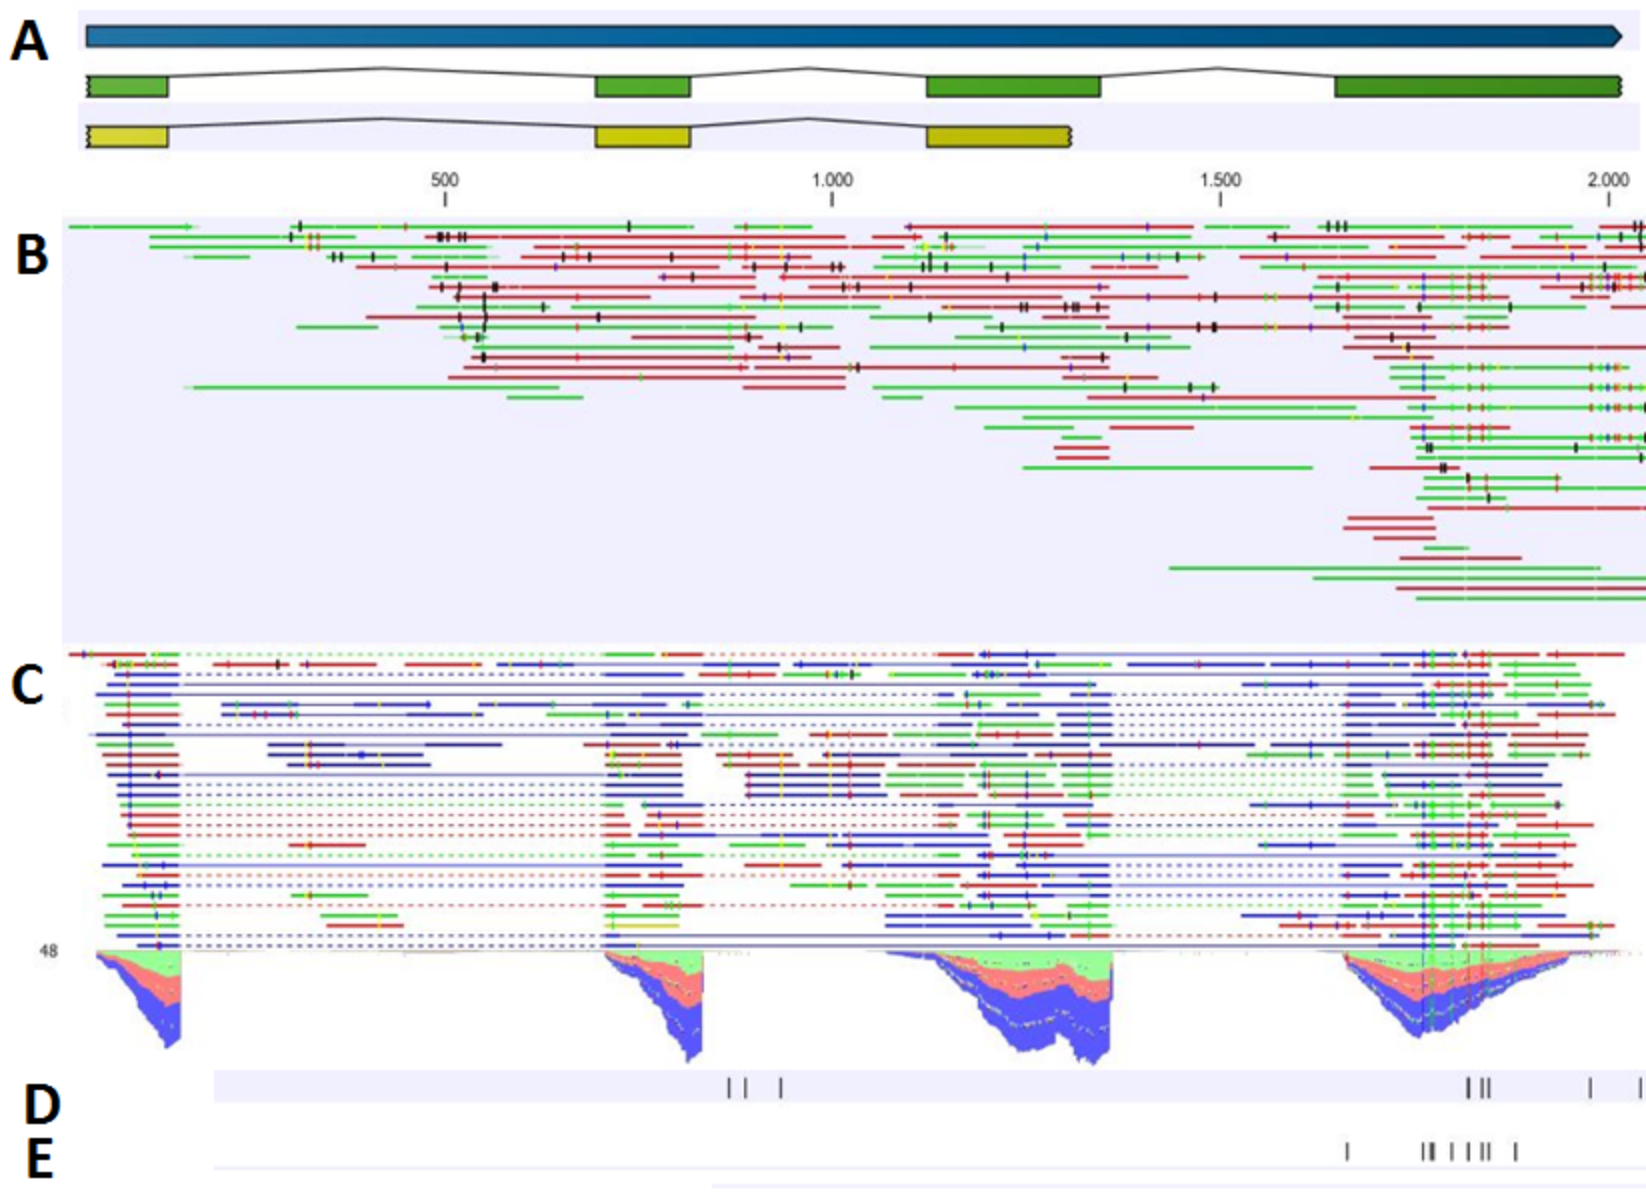

Supplement: f1 [file 538549.f1.zip]
